# Supplementary material
Source: PubMed Central journal article supplement (PMC5567838)
Supplement: NIHMS897357-supplement-Supp_Info_and_Figs.pdf [file NIHMS897357-supplement-Supp_Info_and_Figs.pdf]

**Supplementary Information:**

**GRIL-Seq, a method for identifying direct targets of bacterial small regulatory RNA by *in vivo* proximity ligation**

Kook Han<sup>1</sup>, Brian Tjaden<sup>2</sup>, and Stephen Lory<sup>1,\*</sup>

<sup>1</sup> Department of Microbiology and Immunobiology, Harvard Medical School, Boston, MA, USA.

<sup>2</sup> Computer Science Department, Wellesley College, Wellesley, MA, USA.

\* To whom correspondence should be addressed: [stephen\\_lory@hms.harvard.edu](mailto:stephen_lory@hms.harvard.edu)

## Supplementary Note 1.

### Identification of positively regulated genes by *in vivo* RNA ligation

A subgroup of sRNAs activates translation by base pairing with certain mRNAs and changing the translational inhibitory structures at their 5' UTRs<sup>1,2</sup>. The consequence of this interaction is stabilization of the sRNA-mRNA complex and release of the sequestered ribosome-binding site. Unlike the mRNAs negatively regulated by a repressor sRNA, the 3' ends of these mRNAs seem to be more stable to the endonucleolytic cleavage, presenting ligatable 3' OH groups at the naturally-terminated 3' ends, raising the question whether the GRIL-Seq method can be used to detect sRNA targets of positively-regulated genes. Therefore, we investigated whether we could detect chimeric ligation products formed between an activating sRNA and its target mRNA.

We tested the sRNA-mRNA ligation method in *E. coli* where the sRNA RyhB controls iron homeostasis in an analogous way to PrrF1 and PrrF2 in *P. aeruginosa*<sup>3-7</sup>. In addition to controlling the repression of several iron-regulated genes, RyhB has also been shown to activate the expression from the self-inhibited *shiA* transcript, encoding shikimate permease, through a base-pairing mechanism<sup>6</sup>. This allowed us to evaluate the ability of expressed T4 RNA ligase to catalyze formation of chimeric RNA molecules between sRNAs and positively regulated mRNAs.

We constructed a strain of *E. coli* carrying plasmid pKH13-*t4rnll* (encoding the T4 RNA ligase) and pKH6-RyhB expressing the RyhB sRNA. Based on previously published work defining the regulatory range of this sRNA<sup>3</sup>, we first tested the *in vivo* ligation reaction in a T4 RNA ligase-expressing *E. coli* by detecting the chimeric RNAs consisting of RyhB and two of its known targets (*sodB* and *sdhD*). Following induction of expression of the T4 RNA ligase and RyhB, we analyzed the chimeric products using specific primers for the target and two non-target transcripts (*efp* and *rspT*). Notably, the ligated products were only detected with primers specific for *sodB* and *sdhD* (**Supplementary Fig. 4a**). We next examined whether RyhB could be linked to the positively regulated target *shiA* mRNA (**Supplementary Fig. 4b**). Using RyhB-binding forward primer and *shiA* binding reverse primer, the ligated products were detected. Amplicons corresponding to the chimeras were excised, cloned, and sequenced to identify the RyhB-mRNA junctions (**Supplementary Fig. 3b and 3c**). As depicted schematically in **Supplementary Fig. 4c**, ligation products between the 5' end of RyhB and three closely linked 3'-OH sites in *sodB* and *sdhD* were detected. Three different ligation products were identified as

chimeras between *shiA* and RyhB. Interestingly, they are the result of internal cleavages in both of RyhB and *shiA*: a cleavage at 60 nt of RyhB created a substrate for ligation to *shiA* in the 5' UTR (at -65) while the cleavage at position 61 of RyhB allowed for ligations at -64 and -65 relative to the start of transcription of *shiA*. From these experiments we conclude that the GRIL-Seq method is suitable for the identification of sRNA targets in different microorganisms, involving base-pairing interactions between sRNAs and positively as well as negatively regulated mRNAs.

## **Supplementary Note 2.**

### **Regulatory consequences of mutations in the region of PrrF1 predicted to base-pair with *sodB* and *gloA1*.**

In order to confirm the predicted base-pairing between sRNA and its targets, we created mutations in PrrF1 and compensatory mutations in the base-pairing region of *sodB* and *gloA1*. We then assessed the regulatory effect on target gene expression when sRNA was mutated in the predicted base-pairing region. We created six mutations in PrrF1 (**Supplementary Fig. 10a and b**) and determined their effect on the *sodB-lacZ* and *gloA1-lacZ* reporter constructs as well as on the expression of the SodB-6His and GloA1-6His. We detected variable loss of regulation of target gene expression when sRNA was mutated in the predicted base-pairing region. For *sodB*, substitutions M2, M2.5, M3 and to a lesser extent M1 and M1.5 resulted in an increase in the expression of the *lacZ* reporter construct and the His-tagged protein providing support for the assignment of the *sodB*-PrrF1 core base-pairing region within the RNA duplex based on the hybridization model. Mutation M4 probably does not base pair with its target, since it did not cause an alteration in the expression of *sodB* (**Supplementary Fig. 10c**). For GloA1, mutations M1, M1.5 located in the base-pairing region of the two RNA molecules abolished the regulatory effect of PrrF1, as did the mutation M2.5, which is not predicted to base pair (**Supplementary Fig. 10d**). All other mutations are located outside the base-pairing region and these did not lead to alterations in the levels of *gloA1* expression. We confirmed the base-pairing for M2 and *sodB* and M1.5 and *gloA1* by engineering compensatory mutations, M2' and M1.5', respectively (**Supplementary Fig. 10e and f**). When base-pairing was restored the expression of both targets was once again subject to regulation by the corresponding PrrF1 mutant. Therefore, predictions

of base-pairing near the ligation junctions identified by GRIL-Seq can predict likely sites of regulatory interactions between sRNA and its target.

### **Supplementary Note 3.**

#### **Interaction of PrrF1 with a fragment the 3' end of *katA* mRNA**

GRIL-Seq analysis of the PrrF1 chimeras revealed that the *katA* transcript, encoding the catalase protein, was ligated to PrrF1 near the 3' end of the mRNA with minor ligation products detected near its 5' end (**Supplementary Fig. 11a**). Interestingly, the chimera at the 3' end of *katA* mRNA is formed by the ligation of the PrrF1 fragmented at position +80 (**Supplementary Fig. 11c**). The location of the junctions within the chimera and  $\rho$ -independent terminator of *katA* mRNA shows that the *katA* derived portion is ~140 nt (**Supplementary Figs. 11b**) which is similar in size to a form of *katA* detected in *P. aeruginosa* when cultures approach stationary phase of growth (**Supplementary Fig. 11d**); we refer to this short form of the transcript as *skatA*. Previous mapping of transcription start sites<sup>8</sup> identified only a single promoter for the *katA* gene and no internal starts; we therefore conclude that *skatA* is a stable fragment derived from the *katA* mRNA by an endonucleolytic cleavage event. Growth of *P. aeruginosa* in media of limited iron availability (accomplished by treating the iron chelator 2,2'-dipyridyl; DIP+) leads to a strong induction of PrrF1 and PrrF2, and these conditions show minimal effects on *skatA* levels (**Supplementary Fig. 11e**). Moreover, since *skatA* can be detected even in the absence of PrrF1-F2, albeit at somewhat reduced levels, these results also indicate that *skatA* is derived from the full-length *katA* mRNA by a likely nucleolytic process not involving interaction with the sRNA. Relatively stable predicted base pairing between *skatA* and PrrF1 ( $\Delta G = -25.6$  kcal/mol, IntaRNA) suggests that they interact directly with each other in an RNA duplex (**Supplementary Fig. 11f**).

To further investigate the consequences of this atypical interaction at the 3' end of the *katA* transcript we constructed a plasmid expressing an inducible form of *skatA* (corresponding to the 147 nucleotides of the wild-type *katA* sequence) and one with a mutation in the region of base pairing, referred to as *skatA*(M), (**Supplementary Fig. 11f**). These plasmids, together with the empty vector, were introduced into *P. aeruginosa* and the effect of *skatA*, on PrrF1 regulation of *katA* was assessed following depletion of iron by addition of the chelator 2,2'-dipyridyl (DIP) (**Supplementary Fig. 11g, top panel**). Induction of PrrF1 through iron limitation for as little as

20 minutes led to significant reduction in *katA* transcript levels (**Supplementary Fig. 11g**, Vec lanes). Expression of *skatA* had a modest effect on the overall levels of *katA* mRNA, however it was more stable and showed less than 50% decay after 20 minutes (**Supplementary Fig. 11g**, *skatA* lanes). In contrast, expression of *katA*(M) with the mutation in the predicted PrrF1 (and PrrF2) base-pairing region failed to stabilize the *katA* mRNA (**Supplementary Fig. 11g**, *skatA* (M) lanes); it decayed at a rapid rate comparable to the one seen with the empty vector. These results suggest that the base-pairing interaction between PrrF1 (and very likely, PrrF2) and *skatA* influences the stability of the full-length *katA* mRNA. We have previously shown that a translational *lacZ* fusion, containing only the first 20 codons of *katA* was subject to negative regulation by PrrF1 (**Supplementary Fig. 9b**). Therefore, sequestration of PrrF1-PrrF2 by *skatA* leads to an interference with their negative regulatory function at the 5' binding site of *katA*.

Base pairing between PrrF1-PrrF2 and *skatA* should also reduce the overall availability of these sRNAs to regulate their other targets. Indeed, similar effects of the wild type *skatA* and the mutant form were observed when probing for the *sodB* transcript (**Supplemental Fig. 11g**, second panel). As was seen with *katA*, the *sodB* mRNA was stabilized by overexpression of *skatA* and this effect depended on intact base-pairing sequence on *skatA*.

Results presented here provide another example of regulatory functions associated with mRNA-derived fragments. This mechanism resembles the activity of the SroC sRNA sponge, derived by processing of the *gltI* mRNA and controlling the translation/stability of amino acid biosynthesis and transporter mRNAs by sequestering the GcvB sRNA<sup>9</sup>. Another mRNA-derived endonucleolytic product is CpxQ, an sRNA corresponding to the 3' fragment of *cpxP* mRNA; it was shown to repress expression of a number of membrane proteins following envelope stress<sup>10</sup>. Although we cannot exclude the possibility that the 140 nt *skatA* also functions as a base-pairing regulatory sRNA with as yet uncharacterized mRNA targets, our data suggest that it is a sponge modulating PrrF1 (and likely, PrrF2) availability.

#### **Supplementary Note 4.**

##### **Ligation of PrrF1 to tRNA precursors**

RNA-seq analysis also showed that the levels of two aspartic acid tRNAs (tRNA-asp) were reduced in response to PrrF1 overexpression (**Table. 1** and **Supplementary Table 1**). In *P. aeruginosa*, four genes encode tRNAs with Asp anti-codon sequences: PA1804.1, PA3094.1,

PA3094.2, PA3262.1 and these will be referred to as tRNA-asp<sup>1</sup>, tRNA-asp<sup>2</sup>, tRNA-asp<sup>3</sup>, tRNA-asp<sup>4</sup>, respectively. Three tRNAs are valine specific: PA2775.1 (tRNA-val<sup>1</sup>), PA3094.3 (tRNA-val<sup>2</sup>), PA3262.2 (tRNA-val<sup>3</sup>). In a polycistronic arrangement, tRNA-val<sup>2</sup>, tRNA-asp<sup>3</sup> and tRNA-asp<sup>2</sup> are transcribed as a single transcript<sup>11</sup>, while the tRNA-val<sup>3</sup> is linked to tRNA-asp<sup>4</sup> (**Supplementary Fig. 12a**). Interestingly, our GRIL-Seq results showed extensive ligation of PrrF1 to sites at the 3' ends of tRNA-asp<sup>3</sup> and tRNA-asp<sup>4</sup>; they were observed only when the tRNA-val and tRNA-asp were in the same precursor transcript. A much smaller number of broadly distributed chimeras between PrrF1 and tRNA-val<sup>2</sup> and tRNA-val<sup>3</sup> was detected, and only in the polycistronic transcripts with tRNA-asp. Although sequences of these tRNA-asps are nearly identical (97%), the nucleotide differences adjacent to the 3' end of each tRNA-asp are unique and this allowed correct assignment of the sequencing reads to a specific tRNA-asp (**Supplementary Fig. 13a and b**). The ligation of PrrF1 to a few nucleotides beyond the 3' end of each tRNA indicated that the sRNA binds to the unprocessed precursor transcript. Interestingly, we found that the most stable base pairing of PrrF1 was predicted to occur to tRNA-val<sup>2</sup> and tRNA-val<sup>3</sup>, but not the unlinked tRNA-val<sup>1</sup> (**Supplementary Fig. 12c**). This sequence (shown in **Supplementary Fig. 12d**) occurs only in tRNA-val<sup>2</sup>, in the un-processed precursor tRNA-asp<sup>2</sup> and tRNA-asp<sup>3</sup>, and in tRNA-val<sup>3</sup>, transcribed as a polycistronic transcript with tRNA-asp<sup>4</sup>. Therefore, base pairing with either tRNA-val<sup>2</sup> or -val<sup>3</sup>, in the precursor transcript leads to processing at the adjacent tRNA-asp<sup>2</sup>, tRNA-asp<sup>3</sup> and tRNA-asp<sup>4</sup>. The hypothesis that the processing at the 3' end of the tRNA-asps requires a linked sequence containing the base-pairing region (tRNA-val<sup>2</sup> and -val<sup>3</sup>) for PrrF1 is supported by the observation that no chimeras were detected containing tRNA-asp<sup>1</sup> whose gene is not linked to any tRNA-val, in spite of its 97% identity with tRNA-asp<sup>2</sup>, -asp<sup>3</sup>, and -asp<sup>4</sup>. Moreover, tRNA-val<sup>1</sup>, transcribed as a monocistronic transcript, was unlikely to ligate to PrrF1 and lacks the predicted PrrF1 base-pairing region (**Supplementary Fig. 12d**). These results suggest that PrrF1 appears to specifically bind to two valine tRNA (val<sup>2</sup> and val<sup>3</sup>) following transcription of the polycistronic RNA. Moreover, the most frequent ligation sites (~95%) on tRNA-asps in chimeric reads were not at the 3' end of the mature CCA sites of the tRNAs (**Supplementary Fig. 13b**). Instead, they occurred at one to four nucleotides downstream of the end of the CCA sites, implying that the precursor tRNA forms are likely favorable for this ligation before exonucleases trim these sequences. Consequently, they

cannot function as amino acid acceptors and this may explain their enhanced sRNA-facilitated turnover.

The discovery of a regulatory role for tRNA fragments in interactions with sRNAs has been previously reported<sup>12</sup>, where a 3' external spacer portion of the glyW-cysT-leuZ polycistronic tRNA precursor is targeted by the RyhB and RybB sRNAs. The sequestration of the sRNAs results in up-regulation of the expression from their mRNA targets. Although we detected a direct effect of PrrF1-tRNA-val interaction on the levels of the two tRNA-asps in RNA-seq analysis, we cannot exclude the possibility that this interaction also affected the availability of PrrF1 to regulate its natural mRNA targets.

## **Supplementary Note 5.**

### **GRIL-Seq Protocol**

#### **A. Library Preparation for Illumina Sequencing**

##### **Reagents:**

- Direct-zol™ RNA MiniPrep w/ TRI-Reagent® kit (Zymo Research, cat. no. R2053)
- Nuclease-free water (Thermo Fisher Scientific, cat. no. AM9930)
- Agilent RNA 6000 Pico Kit (Agilent Technologies, cat. no. 5067-1513)
- Agilent DNA 1000 Kit (Agilent Technologies, cat. no. 5067-1504)
- KAPA SYBR® FAST Universal One-Step qRT-PCR Kit (KAPA BIOSYSTEMS, cat no. KK4651)
- SuperScript® III First-Strand Synthesis System for RT-PCR (Thermo Fisher Scientific, cat. no. 18080051)
- 2 X GoTaq® Green Master Mix (Promega, cat. no. M7123)
- CloneJET PCR Cloning Kit (Thermo Fisher Scientific, cat. no. K1231)
- MicroExpress kit (Ambion/Applied Biosystems, cat. no. AM1901)
- Washing Solution for Oligo MagBeads: See the procedure 6-3-3) and 6-3-4) for detailed use  
0.5 M GuSCN, 0.04 M Tris-Cl pH7.5, 0.008 M EDTA, 0.5% Fraction V bovine serum albumin, 0.5% Sodium Lauroryl sacosine, 0.05% Bronopol.
  - GuSCN (Sigma-Aldrich, cat. no. 50983)
  - Tris-Cl pH7.5 (Ambion/Thermo Fisher Scientific, cat. no. 15567-027)
  - EDTA (Ambion/Thermo Fisher Scientific, cat. no. AM9260G)

- Fraction V bovine serum albumin (EMD Millipore, cat. no. 2930 -100GM)
- N-Lauroylsarcosine sodium salt solution (Sigma-Aldrich, cat. no. L7414)
- 2-Bromo-2-nitro-1,3-propanediol (Bronopol) (Sigma-Aldrich, cat. no. 134708)

- TURBO DNase (Ambion/Thermo Fisher Scientific, cat. no. AM2239)
- DMSO (Sigma-Aldrich, cat. no. D8418)
- Actinomycin D (Sigma-Aldrich, cat. no. A1410)
- NEBNext® Ultra™ Directional RNA Library Prep Kit for Illumina (New England Biolab, cat. no. E7420S)
- NEBNext® Multiplex Oligos for Illumina® (Index Primers Set 1) (New England Biolab, cat. no. E7335S)
- Solid Phase Reversible Immobilization (SPRI) Beads: PCRCLEAN DX (Aline Biosciences, cat. no. C-1003-5) as an alternative as Agencourt® AMPure® XP Beads (Beckman Coulter, Inc. #A63881)
- UltraPure™ 1M Tris-HCl, pH 7.5 (Thermo Fisher Scientific, cat. no. 15567027)

**Oligos:**

- Primer set for qRT-PCR. See the procedure 4-1)  
The primers pairs targeting T4 RNA ligase (*t4rnl1*) mRNA, sRNA (i.e., PrrF1) and a housekeeping mRNA (i.e., *rpsL*). See the detailed sequences of each primer in **Supplementary Table 5**.
- P1: sRNA binding complementary sequences for the reverse transcription (RT). This anneals to the specific sRNA. See the procedure 5-1).
- P2: nested primer upstream of P1 binding site for the PCR after RT. See the procedure 5-2).
- P3: nested primer downstream of P1 binding site for the amplification after RT. See the procedure 5-2).
- Poly dA-tailed sRNA Capture Oligonucleotide: See the procedure 6-1) to 6-3) for detailed design and use. 5' - AAAAAAAAAAAAAAAAAA-(sRNA binding complementary sequences) -3'

**Bacterial strains:**

Bacterial strain contains two compatible plasmids which are able to separately express T4 RNA ligase and sRNA. They are inducible by addition of IPTG (for T4 RNA ligase) and L-arabinose (for sRNA).



## Procedure:

### 1. Cell culture

- 1) Inoculate the bacterial strain containing the two plasmids (i.e., pKH13-*t4rnII* and pKH6-PrrF1) grown on LB agar plate with two antibiotics (carbenicillin (150 µg/mL) and gentamicin (75 µg/mL)) into 2 mL LB broth containing the same concentration of antibiotics. Cells were grown overnight (~16 h) at 37 °C with shaking at 300 rpm.
- 2) Dilute the overnight culture to OD<sub>600</sub> = 0.01 in 30 mL LB broth containing the two antibiotics (carbenicillin (75 µg/mL) and gentamicin (37.5 µg/mL)). Continue growth of the culture. Pre-warm two flasks (50 mL) and pipettes (10 mL) at 37 °C.
- 3) When the OD<sub>600</sub> reaches 0.5-0.6, split the culture into two pre-warmed flasks (10 mL into each). Induce the T4 RNA ligase expression for the Test culture by addition of IPTG to 1 mM. (No induction of the Control culture). Incubate each culture for an additional 1 h.
- 4) Induce the expression of the sRNA (i.e., PrrF1) in the Test culture by addition of L-arabinose to 0.2%, with no induction of the Control culture. Incubate for 20 min.
- 5) Harvest cells from 1.6 mL of each culture by centrifugation in a microcentrifuge at 13,000g for 1 min.
- 6) Discard the supernatant and immediately freeze the pellets in liquid nitrogen.
- 7) Proceed to RNA isolation or save pellets at -80 °C for next step.

### 2. RNA isolation using Direct-zol™ RNA MiniPrep kit

- 1) Add 700 µL of TRI Reagent® to each microcentrifuge tube (containing Test or Control sample) and immediately lyse the cells by applying vigorous vortex.
- 2) Remove particular matter by spinning at 13,000g for 1 min.
- 3) Add 650 µL of cell lysate into 1.5 mL microcentrifuge tubes containing 650 µL of 100% ethanol and mix thoroughly.
- 4) Transfer the mixture into Zymo-Spin™ IIC Column, in a Collection Tube, and centrifuge at 13,000g for 1 min. Discard the flow-through and the collection tube, and then transfer the column into a new collection tube.
- 5) Add 400 µL of RNA Direct-zol™ RNA PreWash to the column and centrifuge 13,000g for 1 min. Discard the flow-through.
- 6) For in-column DNase I treatment, prepare DNase I master mixture consisting of 8 µL DNase I (2 U/µL), 8 µL 10X Reaction Buffer and 64 µL RNA Wash Buffer, multiplied by the number of samples.

- 7) Add 80  $\mu\text{L}$  of DNase I mixture into the column and incubate for 30 min at 37  $^{\circ}\text{C}$ .
- 8) Centrifuge the column at 13,000g for 1 min. Discard the flow-through.
- 9) Add 400  $\mu\text{L}$  of Direct-zol™ RNA PreWash to the column and centrifuge. Discard the flow-through and repeat this step.
- 10) Add 700  $\mu\text{L}$  of RNA Wash Buffer to the column and centrifuge for 2 minutes to ensure complete removal of the Wash Buffer. Transfer the column carefully into an RNase-free 1.5 mL microcentrifuge tube.
- 11) Add 40  $\mu\text{L}$  of nuclease-free water and incubate for 3 minutes at room temperature. Centrifuge at 13,000g for 3 min and collect the total RNAs in 1.5 mL nuclease-free tube. Keep RNA samples on ice for immediate use, otherwise, storage them at -80  $^{\circ}\text{C}$ .
- 10) Check the concentration of RNA using Nanodrop 1000.

**3. Quality check 1:** To determine the RNA Integrity Number (RIN) number.

- 1) Prepare the samples for Bioanalyzer (Agilent RNA 6000 Pico kit). 2 ng of total RNA was used.
- 2) Check the RIN number. If the total RNA is showing a RIN number greater than 7, proceed to the next step.

**4. Quality check 2:** To test whether T4 RNA ligase and sRNA are induced in the bacteria

- One-step qRT-PCR is carried out for the Test and Control sample using KAPA SYBR FAST One-Step qRT-PCR Kits
  - In addition to T4 RNA ligase and sRNA, a house-keeping gene (i.e., the ribosomal *rpsL* gene) is also tested as a control.
- 1) Prepare qPCR master mix: ensure all reaction components are properly thawed and mixed.
    - Keep the KAPA RT Mix on ice during use, and assembled reactions on ice to avoid premature cDNA synthesis.
    - Calculate the required volume of each component based on the following table:

| One-step qRT-PCR mix                            | $\mu\text{L}$ | Final conc. |
|-------------------------------------------------|---------------|-------------|
| RNA template (total RNA, 10 ng/ $\mu\text{L}$ ) | 2             | 20ng        |
| 2X KAPA SYBR FAST qPCR Master Mix               | 7.5           | 1x          |
| Forward Primer (2 pmol/ $\mu\text{L}$ )         | 1.5           | 200 nM      |
| Reverse Primer (2 pmol/ $\mu\text{L}$ )         | 1.5           | 200 nM      |
| 50X KAPA RT Mix                                 | 0.3           | 1x          |

|                     |     |     |
|---------------------|-----|-----|
| Nuclease-free water | 2.2 | N/A |
| Final volume        | 15  |     |

2) Program the following cycling protocol:

| PCR cycles                           | Temp (°C)                          | Duration | Cycles |
|--------------------------------------|------------------------------------|----------|--------|
| Reverse Transcription                | 42                                 | 5 min    | Hold   |
| Enzyme inactivation                  | 95                                 | 3 min    | Hold   |
| Denaturation                         | 95                                 | 3 sec    | 40     |
| Annealing/extension/data acquisition | 60                                 | 30 sec   |        |
| Dissociation (melting curve)         | According to instrument guidelines |          |        |

3) Check the  $C_t$  value of each gene. Proceed to the next step if each  $C_t$  difference in the expression of T4 RNA ligase and sRNA between the Test and Control sample is more than 4.

**5. Quality check 3:** To test the efficiency of the *in vivo* ligation reaction.

- Under efficient ligation, some of the ligated sRNAs can be generated as double (5'-sRNA-sRNA-3') or concatameric (5'-sRNA-sRNA-...-sRNA-3') or sandwich (5'-sRNA-other RNAs-sRNA-3') ligated forms. Therefore, when RT-PCR was performed with divergent primers corresponding to near 5' and near 3' of sRNA, the ligation can be verified in Test sample by observing much brighter and higher sizes of PCR bands with some smearing compared with the Control sample (no induction of T4 RNA ligase).

- 1) Design of the sRNA specific binding oligomer (P1) for the reverse transcription; 19~23 nucleotides in length to give a melting temperature 50~55 °C. The sequence should be complementary to sRNA and bound to downstream of P2 oligo-binding site (i.e. for PrrF1, the P1 primer is listed in **Supplementary Table 5: P1\_R\_PrrF1+45**)
- 2) Design of the two primers (P2 and P3) for the PCR. P2 primer binds to upstream of P1 binding site with complementary sequence. The binding upstream is required for specific amplification. P3 primer binds to the downstream region of P1 oligo-binding site with sense sequences (i.e. for PrrF1, the P2 and P3 primer are listed in **Supplementary Table 5: P2\_R\_PrrF1+26 and P3\_F\_PrrF1+62**).
- 3) cDNA synthesis using SuperScript® III First-Strand Synthesis System: 1 µg of each total RNA isolated from Test and Control sample was used for each RT reaction.

|                           |    |
|---------------------------|----|
| Reverse transcription mix | µL |
|---------------------------|----|

|                                     |    |
|-------------------------------------|----|
| Total RNA (1 µg)                    | 8  |
| sRNA binding Primer (P1, 2 pmol/µL) | 1  |
| 10 mM dNTP mix                      | 1  |
| Final volume                        | 10 |

- Incubate the tubes at 65 °C for 5 min, then place on ice for at least 1 min.
- Prepare the following cDNA Synthesis Mix, adding each component in the indicated order:

|                                |    |
|--------------------------------|----|
| Reverse transcription mix      | µL |
| 10X RT buffer                  | 2  |
| 25 mM MgCl <sub>2</sub>        | 4  |
| 0.1 M DTT                      | 2  |
| RNaseOUT™ (40 U/µL)            | 1  |
| SuperScript® III RT (200 U/µL) | 1  |
| Final volume                   | 20 |

- Add 10 µL of cDNA Synthesis Mix to each RNA/primer mixture, Mix gently, and collect by brief centrifugation. Incubate for 50 min at 50 °C
- Terminate the reactions by incubating tubes at 85 °C for 5 min. Chill on ice.

#### 4) PCR

|                                       |    |
|---------------------------------------|----|
| PCR mix                               | µL |
| cDNA mixture (10% of reaction volume) | 2  |
| 2 X GoTaq® Green Master Mix           | 10 |
| F_primer (P3, 10 pmol/ µL)            | 1  |
| R_primer (P2, 10 pmol/ µL)            | 1  |
| Nuclease-free water                   | 6  |
| Final volume                          | 20 |

- PCR Cycling Conditions

| PCR cycles           | Temp (°C) | Duration | cycles |
|----------------------|-----------|----------|--------|
| Initial Denaturation | 95        | 3 min    | 1      |
| Denaturation         | 95        | 25 sec   | 30     |
| Annealing            | 55        | 25 sec   |        |

|                 |    |          |   |
|-----------------|----|----------|---|
| Extension       | 72 | 1 min    |   |
| Final Extension | 72 | 5 min    | 1 |
| Hold            | 4  | $\infty$ | 1 |

- Run samples on a 2% agarose gel in 1X TAE buffer.
  - Excise and elute the area of the gel containing the desired chimeric DNA fragment (The amplicons from the Test sample typically show as much bright and higher size of PCR bands with some smearing compared to the Control sample).
- 5) TA-cloning and analysis of the PCR product
- The eluted amplicons from the Test sample are cloned into CloneJET PCR Cloning Kit (ThermoFisher Scientific) as recommended by manufacturer's instructions and colony PCR is carried out with pJET1.2 Forward and Reverse primer sets. The inserts are sequenced using the pJET1.2 Reverse primer.
- 6) Analyze the sequencing results. Proceed next step if the ligated products of sRNA are detected.

## 6. sRNA enrichment using a modification of the MicroExpress kit (Ambion)

- 1) Design the poly dA-tailed sRNA Capture Oligonucleotide:
  - 1-1) Generate a secondary RNA structure of the sRNA using the mfold algorithm (<http://mfold.rna.albany.edu/?q=mfold/RNA-Folding-Form>) and choose an unstructured 23 nucleotide DNA sequence (complementary to the sRNA), to give a melting temperature between 55 and 61 °C and a GC content of 48 to 65% using the oligo calculator (<http://mcb.berkeley.edu/labs/krantz/tools/oligocalc.html>).
  - 1-2) Add an additional sequence of 18 dAs to the 5' end of the designed sRNA-binding DNA sequence (make sure that the sequences are complementary to the sRNA). For example, 5'-AAAAAAAAAAAAAAAAAAAA-(sRNA binding complementary sequences)-3'.
- 2) Dilute the primer stock (100 pmol/ $\mu$ L) to 20 pmol/ $\mu$ L with 10  $\mu$ L of nuclease-free water.
- 3) Follow the manufacturer's instructions in the MicroExpress kit with the following modifications:
 

For the stringent washing of MagBeads, the Wash Solution is freshly made according to the previous report<sup>13</sup> and 300  $\mu$ L is used for each wash (for a total of 3 washes).
- 3-1) RNA denaturation and hybridization of chimeric sRNA with the capturing oligo:
  - Mix total RNAs (10  $\mu$ g, 14  $\mu$ L) from the Test sample and 1  $\mu$ L of sRNA capture oligo (20 pmol/ $\mu$ L).
  - Add 200  $\mu$ L of Binding Buffer and vortex gently.

- Incubate the mixture at 70 °C for 15 minutes to unfold any secondary structures in the RNA and oligonucleotides. Move the mixture to a 37 °C water bath and incubate for 60 min. This will be referred to as the RNA/Capture Oligo Mix.

### 3-2) Preparation of oligo-dT attached Magnetic Beads (referred to as Oligo MagBeads).

- For each RNA sample, pipette 50 µL of Oligo MagBeads per sample, into a 1.5 mL microcentrifuge tube. For example, withdraw 200 µL for 4 samples (50 µL x 4 samples)
- Capture the Oligo MagBeads by placing the tube on a magnetic stand. Leave the tube on the stand until all of the Oligo MagBeads are arranged inside the tube near the magnet. This will take ~3 min.
- Carefully remove the supernatant by aspiration, leaving the beads in the tube, and discard the supernatant.
- Add nuclease-free water to the captured Oligo MagBeads; use a volume of nuclease-free water equal to the original volume of the Oligo MagBeads.
- Remove the tube from the magnetic stand, and resuspend the beads by brief, gentle vortexing.
- Recapture the Oligo MagBeads with a magnetic stand, and carefully aspirate and discard the nuclease-free water leaving the beads in the tube.
- Add Binding Buffer to the captured Oligo MagBeads; use a volume of Binding Buffer equal to the original volume of the Oligo MagBeads.
- Remove the tube from the magnetic stand, and resuspend the beads by brief, gentle vortexing.
- Recapture the Oligo MagBeads with a magnetic stand, and carefully aspirate and discard the Binding Buffer leaving the beads in the tube.
- Add fresh Binding Buffer to the captured Oligo MagBeads; use a volume of Binding Buffer equal to the original volume of Oligo MagBeads.
- Remove the tube from the magnetic stand, and resuspend the beads by gently tapping the tube or very gentle vortexing.
- Place the Oligo MagBead slurry in a 37 °C incubator, and allow the temperature to equilibrate to 37 °C before proceeding.

### 3-3) Capture of the chimeric sRNAs

- Gently vortex the tube of washed and equilibrated Oligo MagBeads to resuspend them, and add 50 µL of Oligo MagBeads to the RNA/Capture Oligo Mix.
- Very gently vortex or tap the tube to mix and microfuge very briefly to get the mixture to the bottom of the tube.
- Incubate 15 min at 37 °C.

- Aliquot the Wash Solution into 2 mL tube considering the required volume for each washing step (for each sample, 900  $\mu$ L (300  $\mu$ L x 3 time) is required) and preheat them at 37  $^{\circ}$ C, which will be used in washing step.

#### 3-4) Wash the Oligo MagBeads with the Wash Solution

- Capture the Oligo MagBeads by placing the tube on the Magnetic Stand.
- Aspirate the supernatant and discard it. Do NOT discard the Oligo MagBeads.
- Wash the beads by adding 300  $\mu$ L pre-warmed (37  $^{\circ}$ C) Wash Solution and gently pipetting beads (Do NOT vortex it).
- Place the beads on the Magnetic Stand and wait for 3 min until the solution is clear.
- Discard the supernatant, being careful not to dislodge the Oligo MagBeads.
- Repeat the wash two more times (total three times).
- Completely remove the washing solution and elute from beads using DNase.

#### 3-5) Elution of Chimeric sRNA from MagBeads with DNase

- To elute the captured RNA, prepare a DNase mixture: prepare the following master mixture considering the number of samples and aliquot to 50  $\mu$ L master mixture into each bead.

| DNase Mix                  | $\mu$ L   |
|----------------------------|-----------|
| 10X TURBO DNase Buffer     | 5         |
| TURBO DNase (2 U/ $\mu$ L) | 1.5       |
| Nuclease-free water        | 43.5      |
| <b>Final volume</b>        | <b>50</b> |

- Mix gently by pipetting beads (do NOT vortex) and transfer to 0.5 mL tube. Incubate at 37  $^{\circ}$ C for 25 min.
- Add 5  $\mu$ L of the DNase Inactivation Reagent and incubate at room temperature for 5 min, mixing occasionally.
- Centrifuge them at 10,000g for 2 min and transfer 47  $\mu$ L of captured RNAs into 1.5 mL collection tube (MicrobExpress kit). Add 153  $\mu$ L of nuclease-free water to 200  $\mu$ L.
- Precipitate by adding 4  $\mu$ L of glycogen (5 mg/mL), 20  $\mu$ L (1/10 volume) of 3 M sodium acetate and 500  $\mu$ L of 100% ethanol. Keep it at -80  $^{\circ}$ C for more than 3 h or overnight.

## 7. Library preparation for Illumina sequencing with enriched chimeric RNAs

### 1) Recovery of enriched chimeric RNAs

- Centrifuge the precipitated samples at 21,000g (4 °C) for 10 min.
  - Discard the supernatant and add 500 µL of 75% ethanol to wash the pellets. Centrifuge again at 4 °C for 5 min.
  - Completely remove the supernatant and dry the pellet with speed vacuum.
  - Add 15 µL of nuclease-free water and check the concentration with Nanodrop.
- 2) Quality Check: To test whether the sRNA is enriched or not
- One-step qRT-PCR is carried out for the enriched sRNA (5~20 ng is used) as shown in the procedure 4-1).
- 3) Follow the protocol for use with Purified mRNA or Ribosome Depleted RNA (Chapter 3) in NEB Next® Ultra™ Directional RNA Library Prep Kit (cat. no. E7420S) with following modifications:
- As a SPRI bead, PCRCLEAN DX beads was used instead of AMPure XP beads
  - In PCR Library Enrichment step, 16 cycles were carried out.
- 3-1) RNA Fragmentation, Priming and First Strand cDNA Synthesis
- Color dots indicate the cap color of the reagent to be added to a reaction.

| RNA Fragmentation mix                                 | µL |
|-------------------------------------------------------|----|
| enriched chimeric RNAs (100 ng)                       | 5  |
| ● NEBNext First Strand Synthesis Reaction Buffer (5X) | 4  |
| ● Random Primers                                      | 1  |
| Final volume                                          | 10 |

- Color dots indicate the cap color of the reagent to be added to a reaction.
  - Incubate the sample at 94 °C for 15 min. Place it on ice.
- 3-2) First Strand cDNA Synthesis
- Prepare a concentrated stock solution of Actinomycin D (5 µg/µL) in DMSO
  - Dilute the Actinomycin D stock solution to 0.1 µg/µL with nuclease-free water.
  - Mix the following components

| cDNA synthesis mix                     | µL  |
|----------------------------------------|-----|
| ● Murine RNase Inhibitor               | 0.5 |
| Actinomycin D (0.1 µg/µL)              | 5   |
| Nuclease-free water                    | 3.5 |
| ● ProtoScript II Reverse Transcriptase | 1   |



|              |    |
|--------------|----|
| Final volume | 20 |
|--------------|----|

- Incubate the samples in a preheated thermal cycler (with the heated lid set at 105 °C) using the following protocol:  
10 minutes at 25 °C  
15 minutes at 42 °C  
15 minutes at 70 °C  
Hold at 4 °C

### 3-3) Second Strand cDNA Synthesis

- Add the following components (total 60 µL) to the First Strand Synthesis reaction (20 µL) and mix thoroughly by gentle pipetting.

|                                                 |    |
|-------------------------------------------------|----|
| Second Strand cDNA Synthesis mix                | µL |
| Nuclease-free water                             | 48 |
| ● Second Strand Synthesis Reaction Buffer (10X) | 8  |
| ● Second Strand Synthesis Enzyme Mix            | 4  |
| Final volume                                    | 80 |

- Incubate in a thermal cycler for 1 hour at 16 °C, with heated lid set at ≤ 40 °C

### 3-4) Purify the Double-stranded cDNA using SPRI Beads (PCRCLEAN DX)

- Vortex PCRCLEAN DX Beads to resuspend.
- In a 1.5 mL microcentrifuge tube, combine 144 µL (1.8X) of resuspended PCRCLEAN DX Beads and the second strand synthesis reaction (~80 µL). Mix well using a vortex mixer or by pipetting up and down at least 10 times.
- Incubate for 5 minutes at room temperature.
- Quickly spin the tube in a microcentrifuge to collect any sample on the sides of the tube. Place the tube on an appropriate magnetic rack to separate beads from supernatant. After the solution is clear (about 5 minutes), carefully remove and discard the supernatant without disturbing the beads that contain DNA targets.
- Add 200 µL of freshly prepared 80% ethanol to the tube while on the magnetic rack. Incubate at room temperature for 30 seconds, and then carefully remove and discard the supernatant.
- Repeat once more for a total of 2 washing steps.
- Air dry the beads for 5 minutes while the tube is on the magnetic rack with lid open. Caution: Do not over dry the beads. This may result in lower recovery of DNA.

- Remove the tube from the magnet. Elute the DNA from the beads into 60  $\mu\text{L}$  10 mM Tris-HCl. Mix well by pipetting up and down. Quickly spin the tube and incubate for 2 minutes at room temperature. Place the tube in the magnetic rack until the solution is clear.
- Remove 55.5  $\mu\text{L}$  of the supernatant and transfer to a clean nuclease-free PCR tube.

### 3-5) End Prep of cDNA Library

- Mix the following components.

|                                            |               |
|--------------------------------------------|---------------|
| Second Strand cDNA Synthesis mix           | $\mu\text{L}$ |
| Purified double-stranded cDNA              | 55.5          |
| ● NEBNext End Repair Reaction Buffer (10X) | 6.5           |
| ● NEBNext End Prep Enzyme Mix              | 3             |
| Final volume                               | 65            |

- Incubate the sample in a thermal cycler (with the heated lid set at 75 °C) as follows:  
30 minutes at 20 °C  
30 minutes at 65 °C  
Hold at 4 °C

### 3-6) Adaptor Ligation

- Dilute the ● (red) NEBNext Adaptor for Illumina (15  $\mu\text{M}$ , cat. no. E7335) to 1.5  $\mu\text{M}$  with a 10-fold dilution (1:9) with 10 mM Tris-HCl.

|                              |               |
|------------------------------|---------------|
| Adaptor Ligation             | $\mu\text{L}$ |
| End Prep Reaction            | 65            |
| ● Blunt/TA Ligase Master Mix | 15            |
| Diluted NEBNext Adaptor      | 1             |
| Nuclease-free water          | 2.5           |
| Final volume                 | 83.5          |

- Do not pre-mix the components to prevent formation of adaptor dimers.
- Mix by pipetting followed by a quick spin to collect all the liquid from the sides of the tube.
- Incubate for 15 minutes at 20 °C in a thermal cycler

### 3-7) Purify the Double-stranded cDNA using SPRI Beads (PCRCLEAN DX)

- Add nuclease-free water (16.5  $\mu\text{L}$ ) to the ligation reaction to bring the reaction volume to 100  $\mu\text{L}$ . It is important to ensure the final volume is 100  $\mu\text{L}$  prior to adding PCRCLEAN DX Beads.
- Vortex PCRCLEAN DX Beads to resuspend.

- Add 100  $\mu\text{L}$  (1.0X) of the resuspended PCRCLEAN DX Beads to the ligation reaction (100  $\mu\text{L}$ ). Mix well on a vortex mixer or by pipetting up and down at least 10 times.
- Incubate for 5 minutes at room temperature.
- Quickly spin the tube in a microcentrifuge to collect any sample on the sides of the tube. Place the tube on an appropriate magnetic rack to separate beads from supernatant. After the solution is clear (about 5 minutes), carefully remove and discard the supernatant. Be careful not to disturb the beads that contain DNA targets.
- Add 200  $\mu\text{L}$  of freshly prepared 80% ethanol to the tube while in the magnetic rack. Incubate at room temperature for 30 seconds, and then carefully remove and discard the supernatant.
- Repeat once more for a total of 2 washing steps.
- Air dry the beads for 5 minutes while the tube is on the magnetic rack with lid open. Caution: Do not over dry the beads. This may result in lower recovery of DNA target.
- Remove the tube from the magnet. Elute the DNA target from the beads with 52  $\mu\text{L}$  of 10 mM Tris-HCl. Mix well on a vortex mixer or by pipetting up and down. Quickly spin the tube and incubate for 2 minutes at room temperature. Place the tube in the magnetic rack until the solution is clear.
- Transfer the 50  $\mu\text{L}$  supernatant to a clean PCR tube. Discard beads.
- To the 50  $\mu\text{L}$  supernatant, add 50  $\mu\text{L}$  (1.0X) of the resuspended PCRCLEAN DX Beads and mix well on a vortex mixer or by pipetting up and down at least 10 times
- Incubate for 5 minutes at room temperature.
- Quickly spin the tube in a microcentrifuge and place the tube on an appropriate magnetic rack to separate beads from the supernatant.
- After the solution is clear (about 5 minutes), discard the supernatant that contains unwanted fragments (Caution: do not discard the beads).
- Add 200  $\mu\text{L}$  of freshly prepared 80% ethanol to the tube while in the magnetic rack. Incubate at room temperature for 30 seconds, and then carefully remove and discard the supernatant.
- Repeat once more for a total of 2 washing steps.
- Briefly spin the tube, and put the tube back in the magnetic rack.
- Completely remove the residual ethanol, and air-dry beads for 5 minutes while the tube is on the magnetic rack with the lid open.
- Remove the tube from the magnet. Elute DNA target from the beads with 19  $\mu\text{L}$  10 mM Tris-HCl. Mix well on a vortex mixer or by pipetting up and down; incubate for 2 minutes at room temperature. Put the tube in the magnetic rack until the solution is clear.

- Without disturbing the bead pellet, transfer 17  $\mu\text{L}$  of the supernatant to a clean PCR tube and proceed to PCR enrichment.

### 3-8) PCR Enrichment of Adaptor Ligated DNA

- To the cDNA (17  $\mu\text{L}$ ), add the following components and mix by gentle pipetting:

| PCR Enrichment reaction mix                                  | $\mu\text{L}$ |
|--------------------------------------------------------------|---------------|
| ● NEBNext USER Enzyme                                        | 3             |
| ● NEBNext Q5 Hot Start HiFi PCR Master Mix                   | 25            |
| ● Index (X) Primer/i7 Primer (10 $\mu\text{M}$ ), NEB #E7335 | 2.5           |
| ● Universal PCR Primer/i5 Primer, NEB #E7335                 | 2.5           |
| Final volume                                                 | 50            |

- PCR Cycling Conditions

| PCR cycles           | Temp ( $^{\circ}\text{C}$ ) | Time     | cycles |
|----------------------|-----------------------------|----------|--------|
| USER Digestion       | 37                          | 15 min   | 1      |
| Initial Denaturation | 98                          | 30 sec   | 1      |
| Denaturation         | 98                          | 10 sec   | 16     |
| Annealing/ Extension | 65                          | 30 sec   |        |
| Final Extension      | 72                          | 5 min    | 1      |
| Hold                 | 4                           | $\infty$ | 1      |

### 3-9) Purify the double-stranded cDNA using SPRI Beads (PCRCLEAN DX)

- Vortex PCRCLEAN DX Beads to resuspend.
- Add 45  $\mu\text{L}$  (0.9X) of resuspended PCRCLEAN DX Beads to the ligation reaction (50  $\mu\text{L}$ ). Mix well on a vortex mixer or by pipetting up and down at least 10 times.
- Incubate for 5 minutes at room temperature.
- Quickly spin the tube in a microcentrifuge to collect any sample on the sides of the tube. Place the tube on an appropriate magnetic rack to separate beads from supernatant. After the solution is clear (about 5 minutes), carefully remove and discard the supernatant. Be careful not to disturb the beads that contain the double-stranded cDNA.

- Add 200  $\mu$ L of freshly prepared 80% ethanol to the tube while in the magnetic rack. Incubate at room temperature for 30 seconds, and then carefully remove and discard the supernatant.
- Repeat once more for a total of 2 washing steps.
- Air dry the beads for 5 minutes while the tube is on the magnetic rack with lid open. Caution: Do not over dry the beads. This may result in lower recovery of DNA.
- Remove the tube from the magnet. Elute the DNA from the beads into 23  $\mu$ L 10 mM Tris-HCl. Mix well by pipetting up and down. Quickly spin the tube and incubate for 2 minutes at room temperature. Place the tube in the magnetic rack until the solution is clear.
- Transfer 20  $\mu$ L of the supernatant to a clean PCR tube, and store at  $-20^{\circ}\text{C}$ .

### 3-10) Assess library quality on a Bioanalyzer (Agilent High **Sensitivity Chip**).

- Dilute 2–3  $\mu$ L of the library (1:4) in 10 mM Tris-HCl.
- Run 1  $\mu$ L in a DNA High Sensitivity chip.
- Check that the electropherogram shows a narrow distribution with a peak size approximately 300 bp.
- If a peak at  $\sim 80$  bp (primers) or 128 bp (adaptor-dimer) is shown in the Bioanalyzer traces; Bring up the sample volume to 50  $\mu$ l exactly with nuclease-free water and repeat the SPRI bead purification. 3).

## 8. Illumina RNA-Sequencing

PE150 (150bp Paired end) and Rapid HiSeq 2500 were performed.

## **B. Data Analysis of GRIL-Seq using CLC work bench ver.6.0**

### 1. Import fastq.gz file

- 1) Select “Import”  $\rightarrow$  “Illumina”.
- 2) Select two fastq.gz files (P5 and P7 reads).
- 3) Select “Paired reads” and save them in a new folder.

### 2. Trim the adaptor sequences

- 1) Create the trim adaptor list: “New”  $\rightarrow$  “Trim Adaptor List”  $\rightarrow$  “Add Row”
- 2) Select the sequences saved in **Step 1-3**: “Toolbox”  $\rightarrow$  “NGS Core Tools”  $\rightarrow$  “Trim Sequences”.
- 2) Select the adaptor sequences (P5 and P7 plus index).
- 3) Create a new folder (i.e. Trimmed) and save them.

### 3. Map entire GRIL-Seq reads to sRNA genes to identify the reads containing chimeras

In this step, both chimeric and non-chimeric sRNA (intact sRNA) from the entire reads will be selected.

- 1) Create a reference genome composed of sRNA gene and save it as a sRNA reference genome.  
- For example, open the PAO1 reference genome → find PrrF1-2 sRNA sequences → Select and save it as PrrF1-2 sRNA reference genome (Ref1\_PrrF12).
- 2) Select the reads trimmed and saved in Step 2 and click the right button; “Toolbox” → “NGS Core Tools” → “Map reads to Reference”.
- 3) Add the sRNA reference genome (i.e., file name: Ref1\_PrrF12)
- 4) In Mapping options, Set up “Length fraction as 0.2” and “Similarity fraction as 0.9”.
- 5) In Result handling, check “Create stand-alone read mapping”.
- 6) Save them.

#### **4. Extract the mapping reads**

- 1) Open the mapping results.
- 2) Click the right button and choose “Extract Sequences”.
- 3) Save them as in a new folder (i.e. Extracted).

#### **5. Map the extracted sequences to sRNA-deleted reference genome**

In this step, the extracted reads containing chimeric sRNA will be mapping to the sRNA deleted bacterial reference genome.

- 1) Create the sRNA-deleted reference genome: remove sRNA gene from PAO1 reference genome and save this modified genome as a new reference genome (i.e., file name: Ref2\_PAO1\_DPrrF1-2). Additional removals of genes are applicable and analyzed it again if an unsuspected mapping is detected after the final mapping of the extracted chimeric reads (Step 4) to sRNA-deleted reference genome. For example, in case of PrrF1, two short sequences (184,326-184,346 and 3,395,294-3,395,320 in PA1061 and downstream of PA3031.1, respectively) were additionally deleted from PAO1 $\Delta$ PrrF1-2 due to the observation of the sequence similarity of PrrF1-2 with these genes.
- 2) Generate the gene track with this reference genome: click the right button “Toolbox” → “Track tools” → “Convert to Track” → ”Select the genome” → “Select ‘Gene’ in Annotation type” → Save them.
- 3) Map the extract reads generated in Step 4 to the sRNA-deleted reference genome as shown in Step 3-2).
- 4) Save them in a new folder (i.e. Mapping to Del\_sRNA PAO1).

#### **6. Create statistics for target regions**

- 1) Select the mapped reads generated in Step 5 and click the right button: “Toolbox” → “Resequencing Analysis” → “Create Statistics for target region” → ”Select the gene track as Track of Target Regions” → Save.

- 2) Open the coverage generated Step 6-1) and click “Create Track List”.
- 3) Click the right button on the track and select “Open this track”.
- 4) The target region coverage track will be shown in table view.
- 5) Analyze the target genes with coverage of mapping.

## Supplementary Methods

### *Construction of LacZ translational fusion*

To control the expression of mRNA, the modified IPTG inducible *tac* promoter with two *lac* operator (*lacO*) sites at both the upstream -35 element and between the -35 and -10 elements<sup>7</sup> was amplified with *lacIq* from the plasmid pKH4 using oligonucleotides (F\_KpnI\_Ptac\_inf/R\_Fus\_Ptac\_inf). The plasmid pKH4 was constructed from the plasmid pMMB67EH by introducing two *lac* operators using two primer pairs (F\_MluI\_lacIq/ R\_Dn\_lacIq and F\_Up\_Ptac/ R\_Dn\_Ptac) and SOEing PCR after linearizing the pMMB67EH with two restriction enzymes MluI and HindIII. The amplified PCR fragments containing *lacIq*, two *lacOs* and *tac* promoter sites was fused with the *lacZ* PCR fragment amplified from mini-CTX-lacZ<sup>8</sup> using primer pairs (F\_Fus\_lacZ\_inf/ R\_AatII\_lacZ\_inf). The plasmid mini-CTX-lacZ was linearized with the restriction enzymes KpnI and ActII and the fused PCR fragment was cloned into the linearized mini-CTX-lacZ to generate the plasmid pPtac-miniCTX::*lacZTL*. Each specific primer pairs shown in Table 1 were used for amplification of 5' UTR and 20 amino acids of each gene. The TSS (transcription start site) of mRNA identified by the previous experiment<sup>1</sup> was used for amplification with *P. aeruginosa* PAO1 genomic DNA as template. Each 5' UTR was cloned into EcoRI and HindIII sites of the integration vector pPtac-miniCTX::*lacZTL*. These constructs and the vector control were integrated into the chromosome of *P. aeruginosa* as described previously<sup>14</sup>.

### *Construction of 3' 6×His Tagged translational fusion*

For construction of the plasmid pPtac-miniCTX-6His, a PCR fragment 1 containing *lacIq* and the modified IPTG inducible *tac* promoter was amplified from plasmid pPtac-miniCTX::*lacZTL* by using oligonucleotides (F\_KpnI\_lacIq/R\_pKHctx3G6His-P). To introduce multi-cloning sites and six His epitope-tags followed by stop codon, a PCR fragment 2 was amplified from plasmid pminiCTX by using oligonucleotides (F\_pKHctx3G6His-P/R\_speI\_lacZTL\_ctx\_inf). The two PCR fragments 1 and 2 were ligated with Quick Ligation™ Kit (NEB) and amplified with oligonucleotides (F\_KpnI\_lacIq/ R\_speI\_lacZTL\_ctx\_inf), yielding the 1.7kb 'lacIq-Ptac-6His' KpnI/SpeI fragment. The plasmid pminiCTX was digested with KpnI and SpeI, and ligated with this 1.7 kb 'lacIq-Ptac-6His' fragment, resulting in the chromosomal integration vector pPtac-miniCTX::*6His*. Each sequence of 5' UTR and ORF (open reading frame) without a stop codon



was inserted into pPtac-miniCTX-6His by EcoRI/HindIII cloning. These construct were integrated into *P. aeruginosa* chromosome as described above.

#### *β-Galactosidase Assays*

An overnight culture of *P.aeruginosa* (pPtac-miniCTX::lacZTL derivatives) was grown and contained either the empty vector (pKH6) or pKH6-PrrF1. The cells were grown in LB with 37.5 μg /mL tetracycline and 37.5 μg /mL gentamicin, and the overnight culture was diluted to an OD<sub>600</sub> ~0.02 in 1 mL LB containing the same concentration of antibiotics and then grown to OD<sub>600</sub> ~1.0. To express the sRNA and mRNA, L-arabinose and IPTG were added to the final concentrations of 0.2% and 100 μM, respectively. β-galactosidase activities were measured with 50 μL of cells after 1.5 h or 3.5 h induction with L-arabninose and IPTG. Miller Units were calculated as described previously<sup>15</sup>.

#### *Quantitative Western Blot analysis*

For the protein samples for Western Blot analysis, each overnight culture was diluted to an OD<sub>600</sub> of 0.1 in LB containing gentamicin (37.5 μg/mL) and tetracycline (37.5 μg/mL). The cells were grown to OD<sub>600</sub> of 0.4-0.6 and then 0.2% arabinose, with 100 μM IPTG, was added to each culture. After 4 hr, 200μL of each cell was collected by centrifugation (15000 r.c.f.; for 1 min) and optical density of each strain was measured at OD<sub>600</sub> with the remaining culture. The pellets were suspended in ice-cold 1 x PBS to a final concentration of 0.002 OD/μL. Total proteins from equal number of cells (0.04 OD) were loaded and resolved by SDS-PAGE. The proteins were transferred to PVDF membranes and the 6His tag was detected using the monoclonal anti-His antibody (THETM Anti-His mAb, GenScript). The loading control RpoA was detected with the monoclonal anti-*E. coli* α-subunit RNA polymerase antibody (BioLegend). The signal was visualized using the Odyssey® CLx Imaging System (LI-COR) according to the manufacturer's instructions.

#### *Northern Blot analysis for *kata* and *skata**

Northern blot was carried out as shown in the main text (**Methods**). The DNA oligonucleotide probes used to detect *kata* mRNA and *skata* are listed in **Supplementary Table 5**.

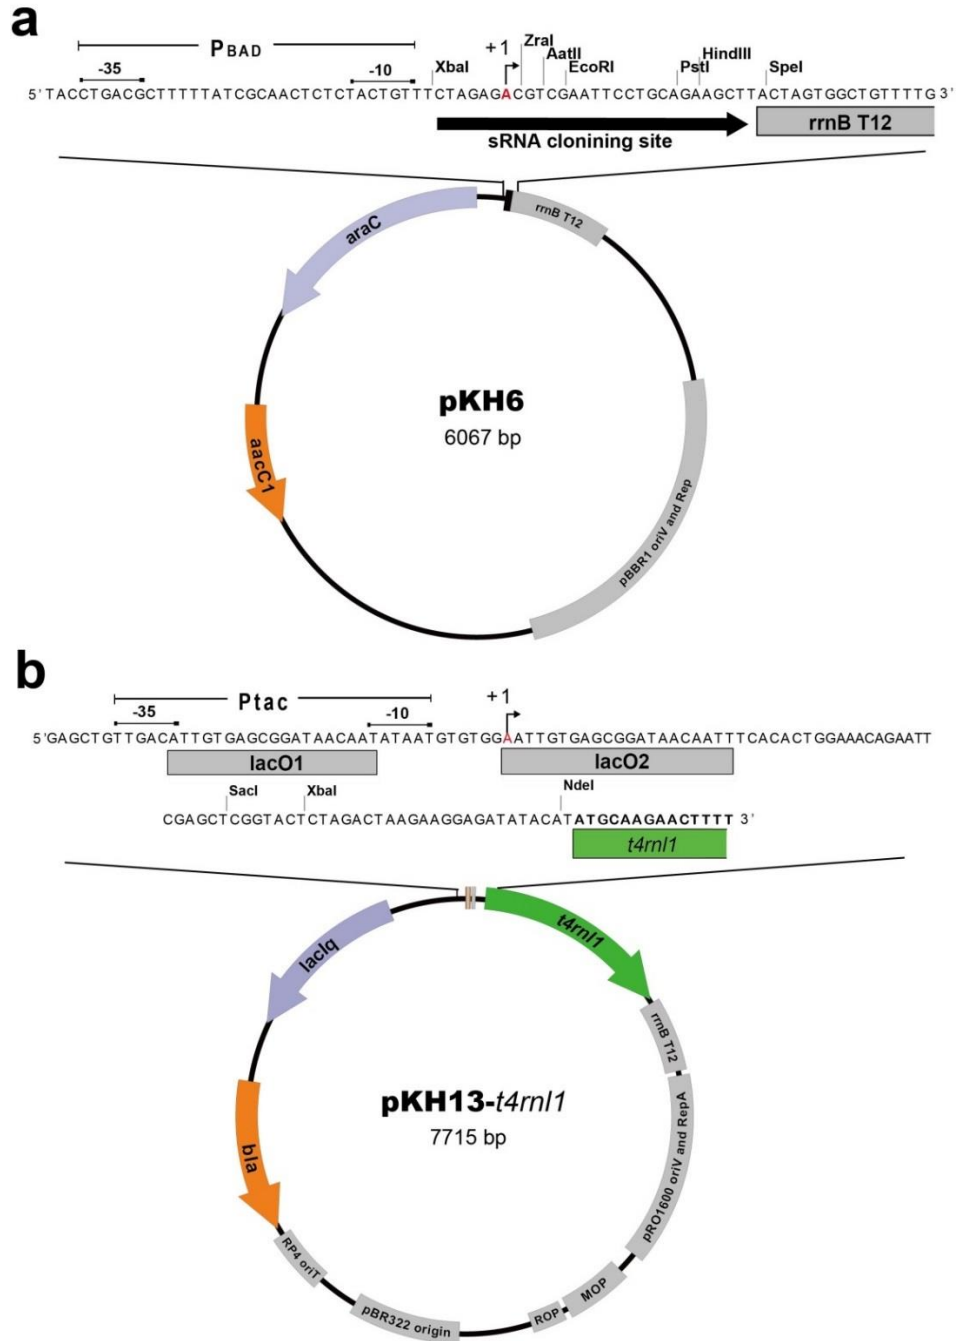

**Supplementary Figure 1. Plasmid maps of pKH6 and pKH13-*t4rnI*.** (a) pKH6 (plasmid used for sRNA cloning); arabinose inducible. (b) pKH13-*t4rnI* (plasmid used for T4 RNA ligase); IPTG inducible.

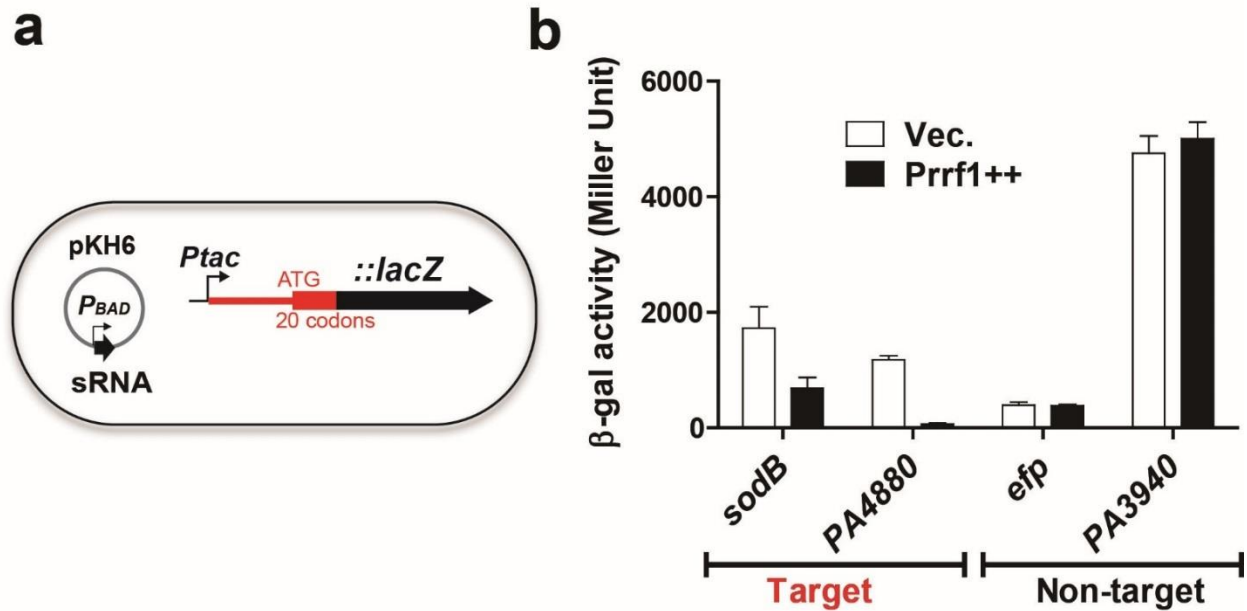

**Supplementary Figure 2. PrrF1 regulation of expression of candidate targets (*sodB* and *PA4880*) and lack of control of non-target genes (*efp* and *PA3940*).** (a) Schematic of reporters used for assessing the PrrF1 dependence of gene expression. In-frame fusions between 5' UTR, the first 20 codons (60 nt) and of each gene and *lacZ* were constructed and integrated into the *P. aeruginosa* chromosome. Plasmid pKH6-PrrF1 expressing wild type PrrF1 sRNA and a control vector (pKH6-Vec) were introduced into the *P. aeruginosa* strains carrying the various fusion constructs. (b)  $\beta$ -galactosidase activity in cells expressing PrrF1 and the *lacZ* fusions. The *lacZ* reporter constructs were induced with 100  $\mu$ M IPTG and PrrF1 with 0.2% L-arabinose at the mid logarithmic growth phase ( $OD_{600} \sim 1.0$ ). After 1.5 hours, the levels of the  $\beta$ -galactosidase activity were determined. Three independent experiments were carried out and error bars indicate standard deviation of each average value.

**a**

| Targets       | #<br>/total | 5' → 3'                                    |                                   |
|---------------|-------------|--------------------------------------------|-----------------------------------|
|               |             | Targets                                    | sRNA (PrrF1)                      |
| <i>sodB</i>   | 1/3         | +1<br>AUG...GCCGCCGCGUGCCUACGAAAAG         | +1<br>AACUGGUCGCGAGAUACAGC...     |
|               | 1/3         | +1<br>AUG...GCCGCCGCGUGCCUACGAAAAGA        | +1<br>AACUGGUCGCGAGAUACAGC...     |
|               | 1/3         | +1<br>AUG...GCCGCCGCGUGCCUACGAAAAGA        | +1<br>AUA AACUGGUCGCGAGAUACAGC... |
| <i>PA4880</i> | 1/3         | +1<br>AUG...GGAAGGCGCGGUCACCGAAGCUAA       | +1<br>AACUGGUCGCGAGAUACAGC...     |
|               | 1/3         | +1<br>AUG...GGAAGGCGCGGUCACCGAAGGCUAUU     | +1<br>AACUGGUCGCGAGAUACAGC...     |
|               | 1/3         | +1<br>AUG...AAGGCUAUUCGCGCGAUCGCCAGACCGUCA | +1<br>AACUGGUCGCGAGAUACAGC...     |

**b**

| Targets     | #<br>/total | 5' → 3'                                   |                                    |
|-------------|-------------|-------------------------------------------|------------------------------------|
|             |             | Targets                                   | sRNA (Ec_RyhB)                     |
| <i>sodB</i> | 1/5         | -18<br>...UAAUAAAGGAGAGUAGCA AUGUCAUUCG   | +1<br>AUA GCGAUCAGGAAGACCCUCGC ... |
|             | 3/5         | -18<br>...UAAUAAAGGAGAGUAGCA AUGUCAUUCGA  | +1<br>AUA GCGAUCAGGAAGACCCUCGC ... |
|             | 1/5         | -18<br>...UAAUAAAGGAGAGUAGCA AUGUCAUUCGAA | +1<br>AUA GCGAUCAGGAAGACCCUCGC ... |
| <i>sdhD</i> | 1/5         | +1<br>AUG...CGCUAUCGUCCUGACGCUCUACA       | +1<br>AUA GCGAUCAGGAAGACCCUCGC ... |
|             | 1/5         | +1<br>AUG...CGCUAUCGUCCUGACGCUCUACA       | +1<br>AUA GCGAUCAGGAAGACCCUCGC ... |
|             | 3/5         | +1<br>AUG...CGCUAUCGUCCUGACGCUCUACA       | +1<br>AUA GCGAUCAGGAAGACCCUCGC ... |

**c**

| Targets     | #<br>/total | 5' → 3'                                      |                                      |
|-------------|-------------|----------------------------------------------|--------------------------------------|
|             |             | sRNA (Ec_RyhB)                               | Target                               |
| <i>shiA</i> | 1/3         | +32<br>...AAGCACGACAUUGCUCACAUUGCUCUCCAG     | -65<br>AUCGACGGCAAUGUGAGUUACCUUUU... |
|             | 1/3         | +32<br>...AAGCACGACAUUGCUCACAUUGCUCUCCAGU    | -64<br>UCGACGGCAAUGUGAGUUACCUUUU...  |
|             | 1/3         | +32<br>...AAGCACGACAUUGCUCACAUUGCUCUCCAGUAAA | -65<br>AUCGACGGCAAUGUGAGUUACCUUUU... |

**Supplementary Figure 3. Sequence analysis of the RT-PCR products created by ligation of sRNAs to their targets.** For each sequence, the RT-PCR products were inserted into plasmid pJET1.2 using the CloneJET PCR Cloning kit (Thermo Fisher Scientific). Colonies were randomly selected and sequenced after amplification by colony PCR. (a) Sequencing results showing the junction sites between 5' ends of PrrF1 and 3' ends of two known targets (*sodB* and *PA4880*). Poly A (Blue) or AUA (Green) additions were observed at the junctions. (b) Sequencing results showing the junctions between 5' ends of *E. coli* RyhB sRNA and 3' ends of two down-regulated targets (*sodB* and *sdhD*). (c) Sequence junctions between 5' ends of *E. coli* RyhB and 3' ends of an up-regulated target (*shiA*).

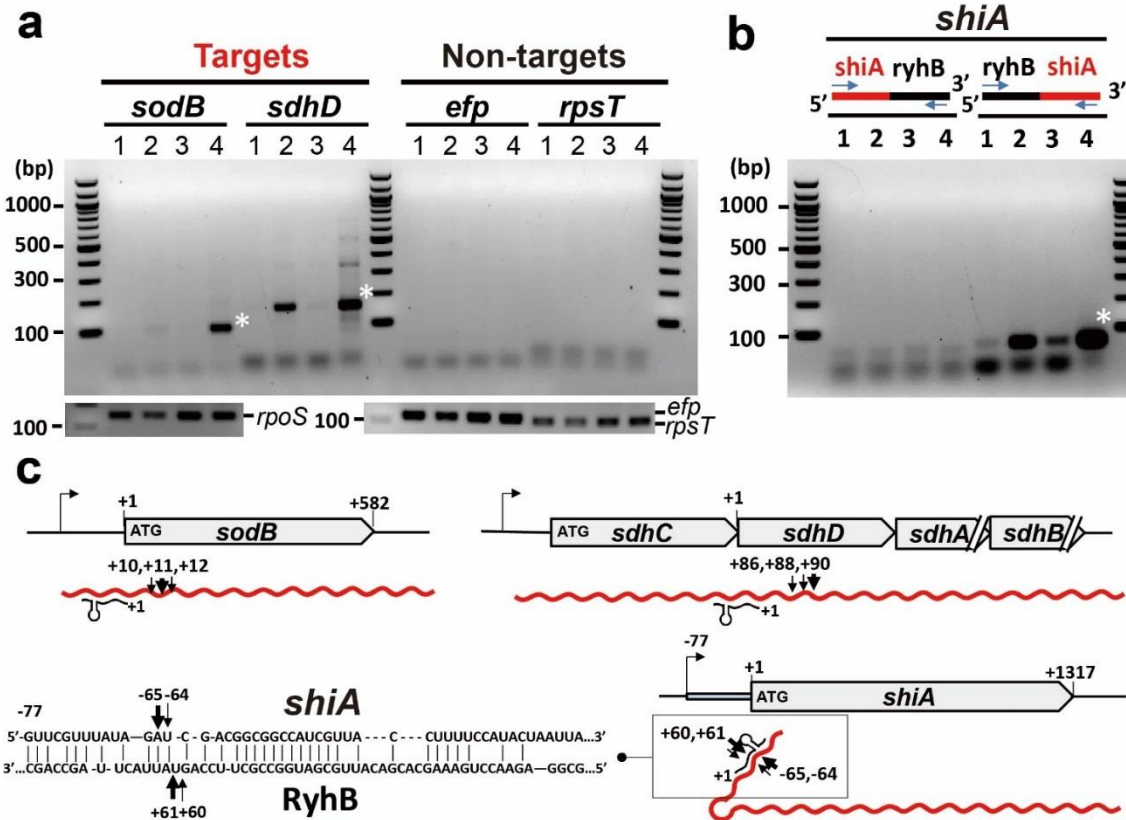

**Supplementary Figure 4. Detection of RyhB targets in chimeric RNAs following T4 RNA ligase expression in *E. coli*.** (a) Detection of specific amplicons by RT-PCR (white stars) indicating ligation between RyhB and its two repressed targets (*sodB* and *sdhD*) following expression of RyhB and T4 RNA ligase. The number indicates a different combination of RyhB and T4RNA ligase expression conditions in *E. coli*. 1: no IPTG, no L-arabinose, 2: no IPTG, with L-arabinose, 3: with IPTG and no L-arabinose, 4: with both IPTG and L-arabinose. PCR amplification of cDNA for *rpoS* and two non-targets (*efp* and *PA3940*) was carried out to ensure the presence of equal amount of target cDNA and cDNA of two non-target genes in all samples, respectively. Results are representative of duplicate experiments. (b) Detection of specific amplicons (white stars) of the ligated RyhB and its up-regulated target using the RyhB binding forward primer and *shiA* binding reverse primer. Results are representative of duplicate experiments. (c) Mapping the junction sites between RyhB and targets, based on the Sanger sequencing results of RT-PCR products. Bent arrows indicate transcription start sites. Arrows indicate the nucleotide positions of the sites in RyhB and target transcripts, joined by T4 RNA ligase.

**a**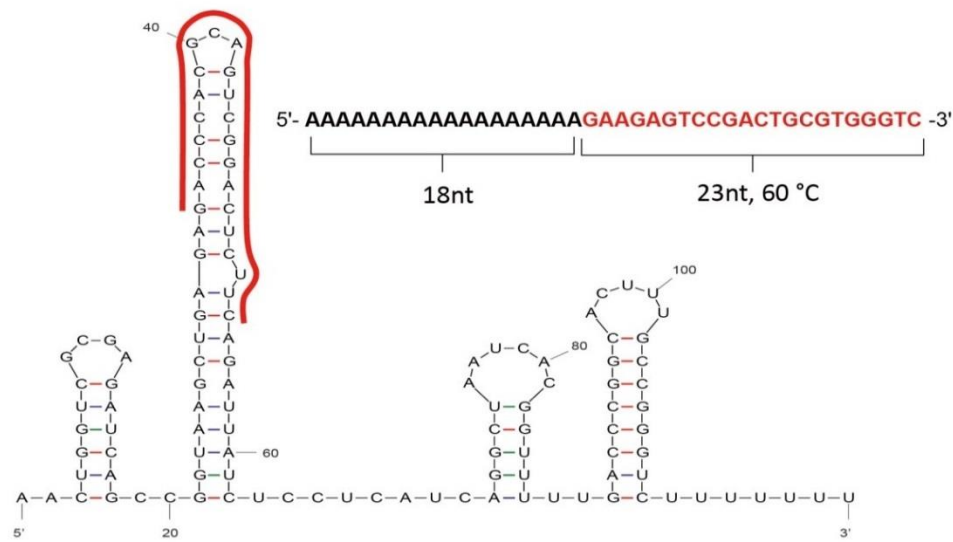**b**

| Lib. | Total Reads | % mapping to rRNAs | # corresponding to PrrF chimeras | % corresponding to PrrF chimeras |
|------|-------------|--------------------|----------------------------------|----------------------------------|
| L1   | 47,247,379  | 53%                | 6,811,939                        | 14%                              |
| L2   | 36,319,510  | 48%                | 6,473,670                        | 18%                              |

**c**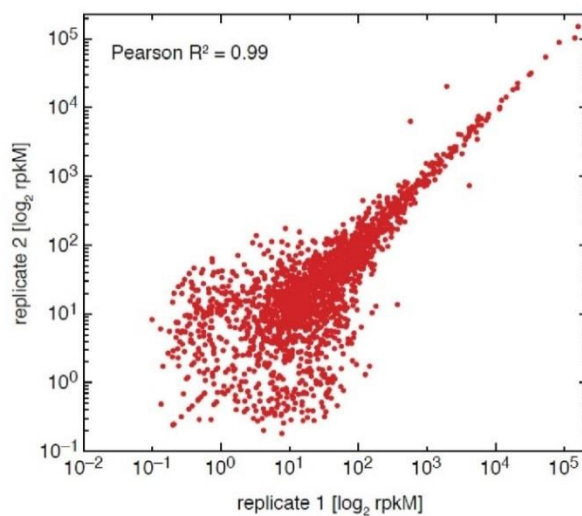

**Supplementary Figure 5. Design of the capture oligonucleotide used for the enrichment of PrrF1 containing chimeras for GRIL-Seq and comparison of the duplicates in the GRIL-Seq experiment.** (a) The PrrF1-chimeras capturing oligo. A DNA oligonucleotide containing 23 base complementary to PrrF1 (shown in red) an 18 poly(A) oligonucleotide sequence. (b) Results of GRIL-Seq. Two libraries from biological replicates were constructed and sequenced using Illumina Rapid HiSeq 2500 (150 PE). (c) The RPKM of the two biological replicates were plotted against each other displaying a high level correlation between the datasets with a Pearson correlation value of 0.99.

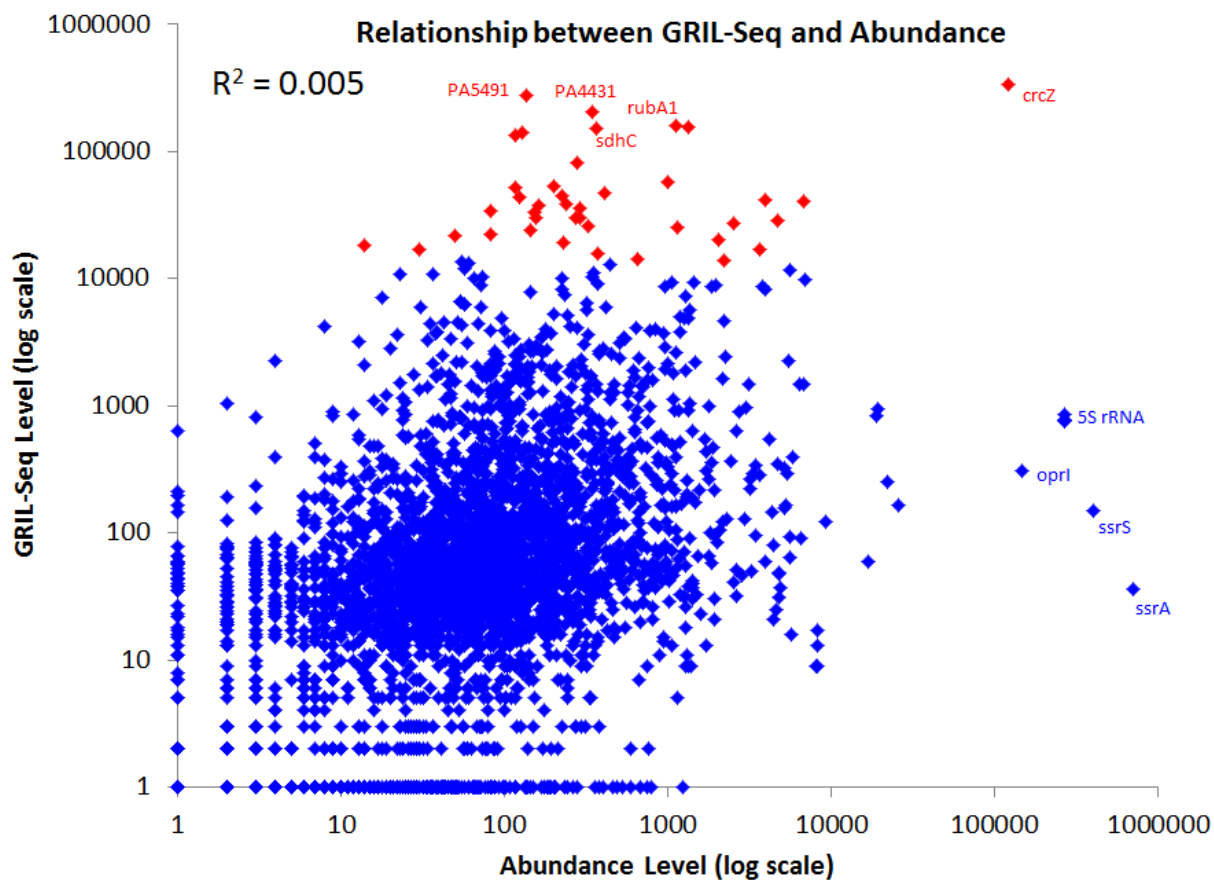

**Supplementary Figure 6. Relationship between GRIL-Seq and transcript abundance.** The scatter plot illustrates the relationship between abundance levels and GRIL-Seq levels for each gene. Abundance levels are determined by RNA-seq as detailed in Supplementary Table 1. GRIL-Seq levels are provided in Supplementary Table 2. Points corresponding to genes among the top 40 GRIL-Seq levels are shown in red. A few points with high GRIL-Seq levels or high abundance levels are labelled with their gene names to provide context. The  $R^2$  value of the points is 0.005, indicating little to no significant correspondence between GRIL-Seq levels and abundance levels.

**Supplementary Figure 7. Detailed analysis of the top 40 targets of PrrF1 identified by GRIL-Seq.**

For each target shown are: (a) the locus in the *P. aeruginosa* PAO1 genome is indicated from [www.pseudomonas.com](http://www.pseudomonas.com) (b) the location of the transcription start site of the target determined by PA14 transcriptome mapping<sup>8</sup> (c) The genomic position of enriched PrrF1-target chimeric RNA (red peak) in PAO1 determined by GRIL-Seq. The number on the right side indicates the value for the maximum coverage (height of the peak) (d) The sequences of target region most likely involved in base-pairing with PrrF1. The sequences that were used in *in silico* hybridization prediction are shown in red. The predicted PrrF1 base-pairing region in the target transcript is in blue. Translation start and stop codon are shown in a box and bold italics, respectively. Where included, the inverted repeat sequence of the translational terminator is also indicated by opposing arrows (e) *In silico* base-pairing predictions using IntaRNA<sup>16</sup>.



## Supplementary Figure 7 - #1

### #1 CrcZ, PA4726.11 : ncRNA

**a** PAO1

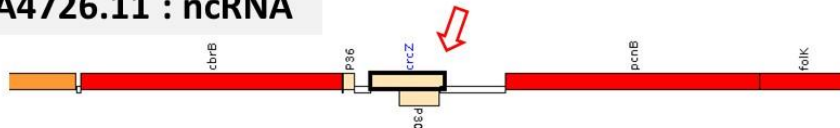

**b** PA14  
(RNA-seq)

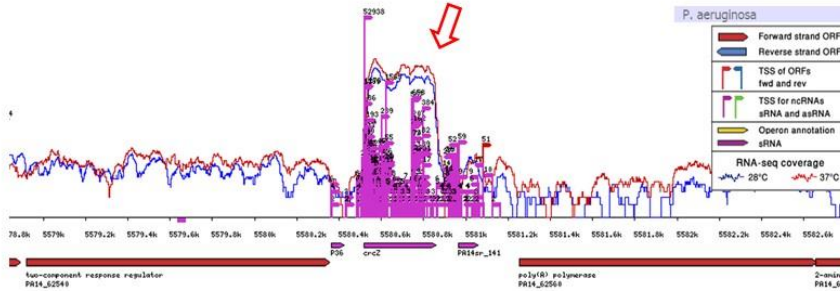

**c** PAO1  
(GRIL-seq)

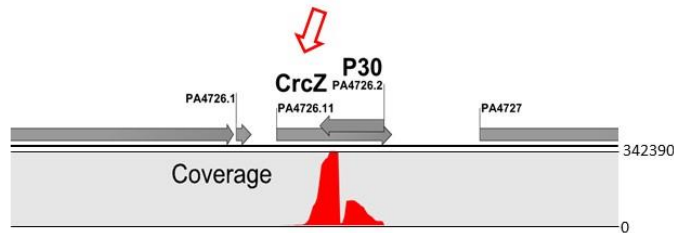

**d**

```

GGAACCCGGTTTTTTTGTGCCCTCCGCCGACCCACCGAAAACCTCAACCCCTTGATTTTACTGGGTTTCGAAAAAAGTGG
CACGCGATCTGCTTATGTATTG+1CACAACAACAATAACAGCAACGACGAAGACAATAAAAAACAACAGCTAACGACTCC
AGCACAACAAAAACAAATCGCGGAGGCGCAGCTAACTGATTCTTTTGAGAGGAGTTGCTGTCGGGACCCGTCCCG
CAGCCAGTCGGAAGAAGAATAAAATGCCTCGAGGCAGCGCACAGACTGGTTGGATCGCTCGACGATCATGGCAGCA
+217 +221 +227 +242 +249 +280
TCAGCGACCAAGCAATCCGTTTGCTATTGAACTCCAGCCTGGGAGATATCCCTGAAGCGACTGGCTCAAGGGACG
GGTCGACAAACAAAAACAAGCCCGAAATCATAATAAAAACAAAGCACGCACCTACTTGGGGGGGAGCTTCGGCT
+406
CCCCAGTAGCTTCACCCCTCCCTCCGTTTTCCCGTTTTI
    
```

**e**

\* Input = +1 to +227

| Target | Position  | Query | Position | Energy   |
|--------|-----------|-------|----------|----------|
| ocrZ   | 215 - 221 | prf1  | 4 - 10   | -8.08618 |

Details of Selected Interaction

```

          214   222
Target  5'-GCA...CAUCA  AAGCA...CCC-3'
          |             |
Query   GCGACCA
          |             |
          CCGCGGU
Query   3'-UUU...UAGAG  CAA-5'
          |             |
          11           3
    
```

Energy: -8.08618 kcal/mol  
 Hybridization Energy: -14.0  
 Unfolding Energy - Target: 2.04327  
 Unfolding Energy - Query: 5.87055

Position - Target RNA: 215 - 221  
 Position - Query RNA: 4 - 10  
 Position Seed - Target RNA: 217 - 221  
 Position Seed - Query RNA: 4 - 8

\* Input = +1 to +406

| Target | Position  | Query | Position | Energy   |
|--------|-----------|-------|----------|----------|
| ocrZ   | 249 - 280 | prf1  | 40 - 75  | -9.94090 |

Details of Selected Interaction

```

          249           281
Target  5'-GCA...CUCUC  UCC  C  A  AAGGG...UUU-3'
          |             |             |             |
Query   AGCCUG  GCGAGTA  CCGAG  G  CCGCCU  C
          |             |             |             |
          UCGAC  CCUCUAG  GACCU  C  GCGUGA  G
Query   3'-UUU...ACTAA  UACU  UA  U  A  C  CACC...CAA-5'
          |             |             |             |
          76           39
    
```

Energy: -9.94090 kcal/mol  
 Hybridization Energy: -34.5  
 Unfolding Energy - Target: 12.57700  
 Unfolding Energy - Query: 11.98210

Position - Target RNA: 249 - 280  
 Position - Query RNA: 40 - 75  
 Position Seed - Target RNA: 255 - 261  
 Position Seed - Query RNA: 58 - 65

## Supplementary Figure 7 - #2

### #2 PA5491 : cytochrome

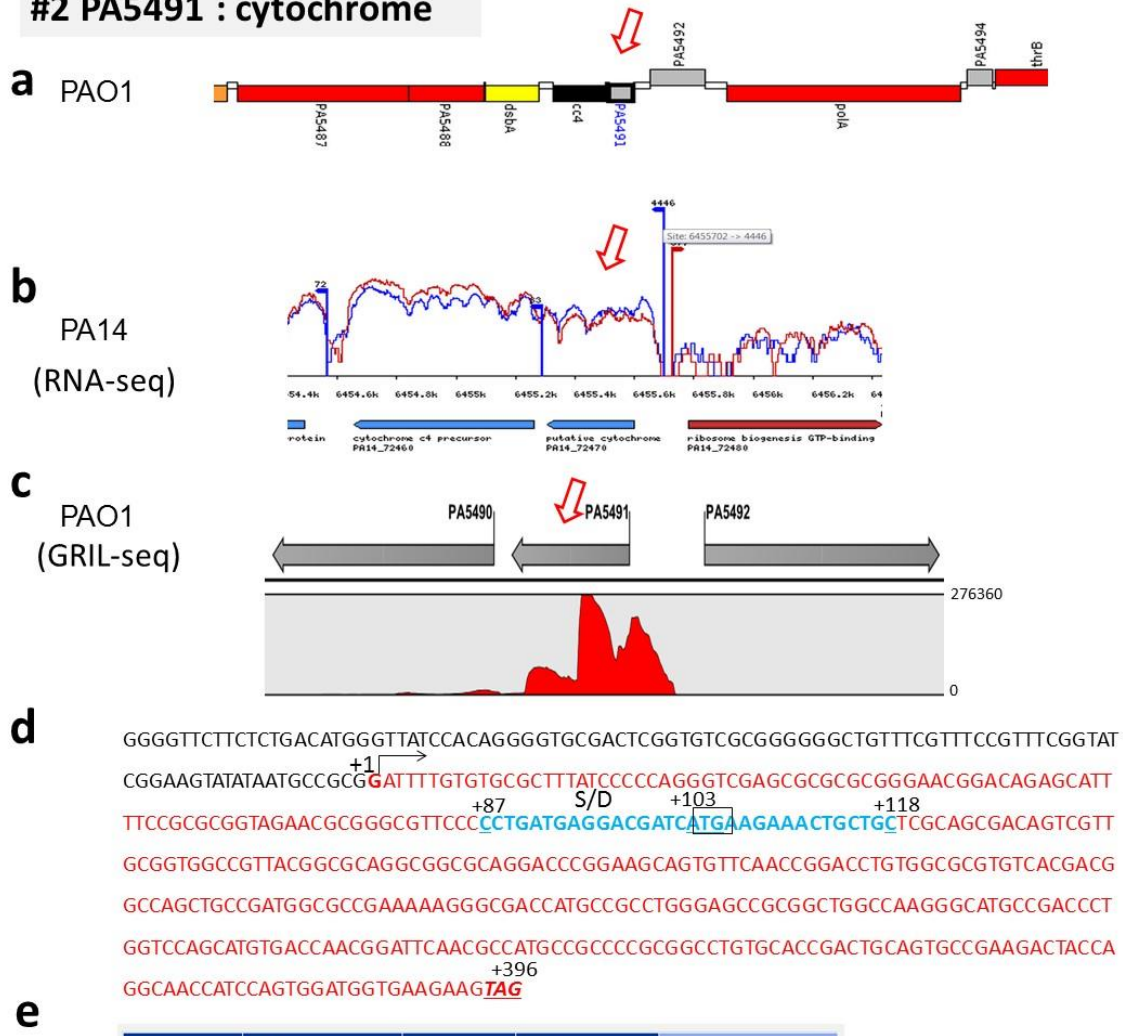

**e**

| Target | Position | Query | Position | Energy    |
|--------|----------|-------|----------|-----------|
| 5491   | 87-118   | P1    | 40-73    | -18.24560 |

Details of Selected Interaction [Download Interaction Details](#)

```

      86      S/D      119
Target 5'-GAU...UUCCC      C      AA      UGCA...UAG-3'
      |      |      |      |      |      |      |      |
      CCUGAUGAGGA      GAGC      UGAGA      CUG      CUGC
      |||||      |||      |||||      |||      |||
Query 3'-UUU...UUAUC      CUA      CA      U      CACCC...CAA-5'
      |      |      |      |      |
      74      74      39
    
```

|                           |                    |                            |          |
|---------------------------|--------------------|----------------------------|----------|
| Energy                    | -18.24560 kcal/mol | Position - Target RNA      | 87 - 118 |
| Hybridization Energy      | -38.7              | Position - Query RNA       | 40 - 73  |
| Unfolding Energy - Target | 8.47483            | Position Seed - Target RNA | 91 - 97  |
| Unfolding Energy - Query  | 11.97960           | Position Seed - Query RNA  | 63 - 69  |

### Supplementary Figure 7 - #3

#### #3 PA4431 : iron-sulfur protein

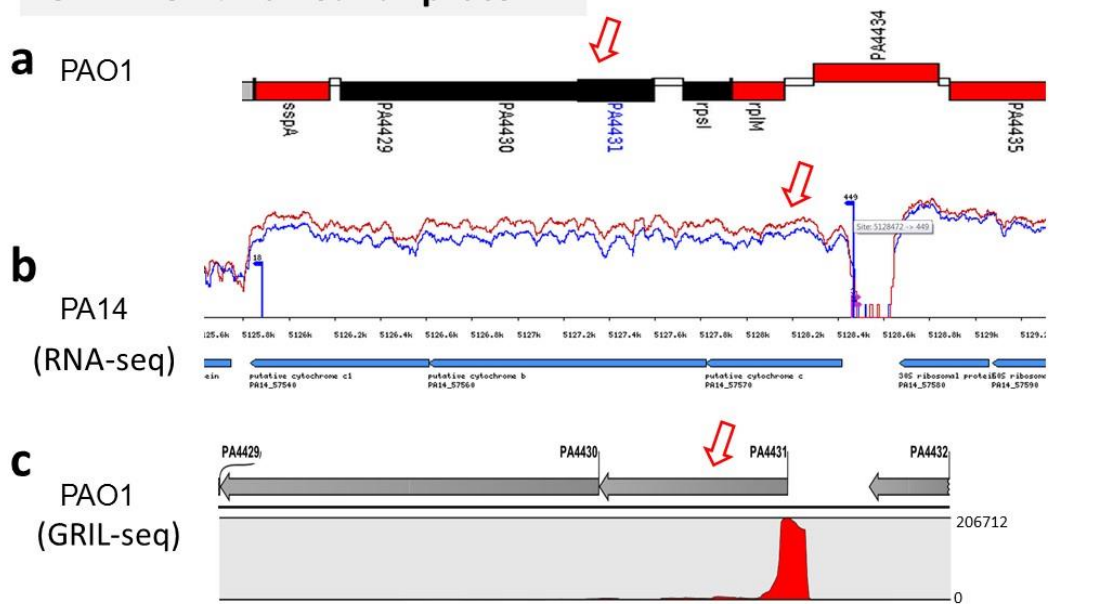

**d**

```

AAAGGGGTTTTCTTACCATTGGCGAATTTTTGCGCGCTCGAA+1TTTTTACTTAAAGGCCTGATTAGAACAGGTC
                S/D                +63      +73
TGAAGCTGATGGAGACGACTGAATGAGTAATGACGGCGTG+155AATGCAGGCCGGCGTCGCTTCTCGTCGCGCCAC
CTCTGTGGTTGGCGCGCGGGAGCGGTGGGTGCTGCGGTC+455CCGTTCTAGGGTCATGGTCCCCAGTGCCAAAGCCA
AGGCTGCTGGCGCGCCGGTGACAGGTGAACGTGGGCAAGATCGATCCAGGTCAGCAGATCATCGTGAATGCCGCGGC
AAGCCTGTATTATCGTGCACCGCACGAAGGAGATGCTGGACGCCCTGCCGAGCCTCGAAGGACAACCTGGCCGACCC
GGACTCCAAGGCCTCGGAGCAGCCGGAGTACGTGATCCCAAGCTTCGCTCGATCAAGCCGGAACCTGGCGGTGATCG
TCGGCATGTCACCCACCTGGGCTGCTGCCGACCTTCC....
    
```

**e**

| Target | Position | Query | Position | Energy    |
|--------|----------|-------|----------|-----------|
| pa4431 | 11-73    | P1    | 37-88    | -15.65190 |

Details of Selected Interaction [Download Interaction Details](#)

```

          10                               74
          |                               |
          |                               |
Target    UACUU      AAAGGCC  UGAUUG      CUGAUG  GGAGA  A  CUGA  G  U  UGAC  GCGUG      AAUGC...UC
          |||:|:|  |||:|:|  |||:|:|  |||:|:|  |||:|:|  |||:|:|  |||:|:|  |||:|:|  |||:|:|  |||:|:|
Query    OCCAG      C      G      U      AU  A      G      A      CCAGA...CA
          |          |          |          |          |          |          |          |
          39                               56
    
```

|                           |                    |                            |         |
|---------------------------|--------------------|----------------------------|---------|
| Energy                    | -15.65190 kcal/mol | Position - Target RNA      | 11 - 73 |
| Hybridization Energy      | -52.0              | Position - Query RNA       | 37 - 88 |
| Unfolding Energy - Target | 22.13570           | Position Seed - Target RNA | 18 - 24 |
| Unfolding Energy - Query  | 14.25240           | Position Seed - Query RNA  | 74 - 80 |

## Supplementary Figure 7 - #4

### #4 rubA1, PA5351 : rubredoxin

**a** PAO1

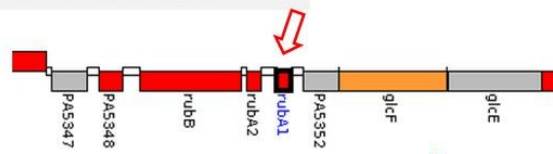

**b** PA14  
(RNA-seq)

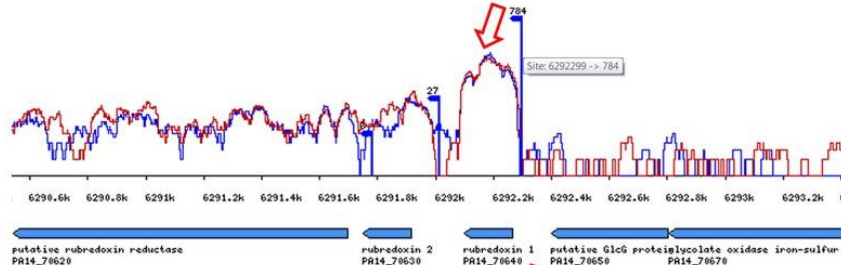

**c** PAO1  
(GRIL-seq)

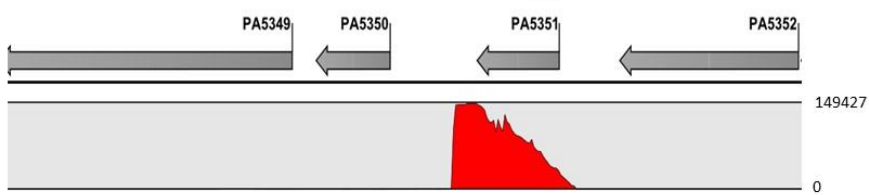

**d**

$+1$   $+4$  S/D  $+33$   
 GCGGACAGGGTGGATTGTTATAGTTGCCGGCGCTGAACCGTGGTAACCCGCCGAGGTAACAATGAAGAAGTG  
 $+54$   
GCAATGCGTGGTGTGTGGACTGATCTATGACGAGGCCAAAGGCTGCCGGAAGAAGGCATCGAGGCGGGAACGCGC  
 TGGGAAGACGTGCCTGAAGACTGGCTGTGCCCGACTGCGGCGTCGCGCAAGCTGGACTTCGAGATGATCGAAATCGG  
 $+243$   
CTGAGCCCCGCTGCCGGCGAAGAAGCGGCCCTGGCCGCTTTTTTCATGCCTGGCCAGCG.....

**e**

| Target | Position | Query | Position | Energy    |
|--------|----------|-------|----------|-----------|
| rubA1  | 4 -- 54  | prf1  | 36 -- 86 | -13.22020 |

Details of Selected Interaction Download Interaction Details

```

      3                               55
      |                               |
5'-GCU |                               | UGUGU...UUU-3'
      |   AAC  GCCC  UAAACNA  AG  AA
Target  GAACCGUGGU  CC  GAGG  UGAAGA  UGGC  UGCGUGG
      |   |||   ||   |||   |||   |||
Query  3'-UUU...CAGUU  AUC  ACUA  UCUAUUAG  CAG  CAG  ACGCACC
      |                               |
      87                               35
  
```

|                           |                           |                            |          |
|---------------------------|---------------------------|----------------------------|----------|
| <b>Energy</b>             | <b>-13.22020 kcal/mol</b> | Position - Target RNA      | 4 -- 54  |
| Hybridization Energy      | -42.1                     | Position - Query RNA       | 36 -- 86 |
| Unfolding Energy - Target | 13.89170                  | Position Seed - Target RNA | 48 -- 54 |
| Unfolding Energy - Query  | 14.94810                  | Position Seed - Query RNA  | 36 -- 42 |

## Supplementary Figure 7 - #5

### #5 *cycB*, PA5300 : cytochrome C5

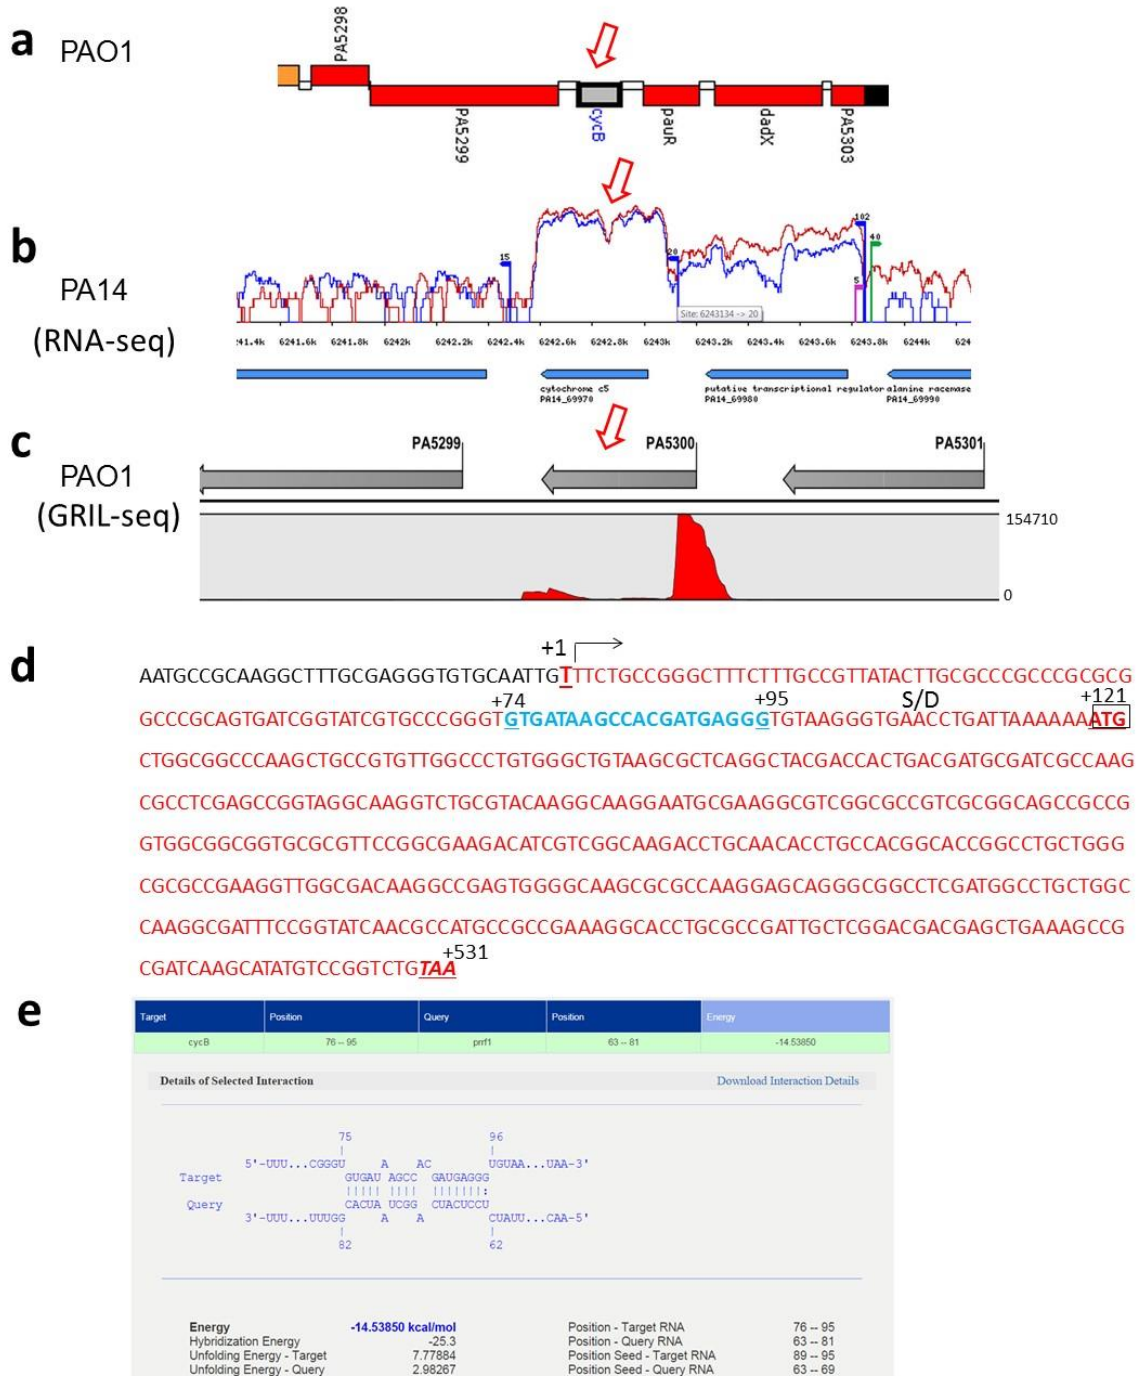

### Supplementary Figure 7 - #6

#### #6 PA1581 : succinate dehydrogenase subunit C

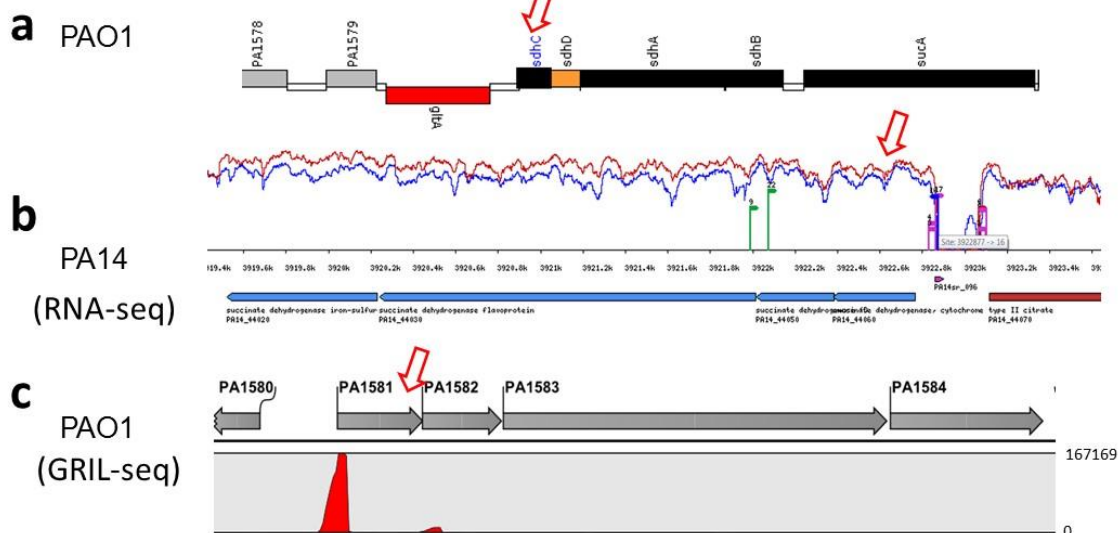

**d**

TTTCGTTGTCATTAGTAGCCTAACTGTCTATACTGGCGTCC<sup>+1</sup>GACC<sup>+118</sup>GCAAGGGGATTCTCGGCCGCTTTCATAGACGG<sup>+133</sup>GTGA  
 TCGCCACTCCCTGGTATGGGTACCTGACAAGTGAAGTCCCGACAACCTAGCCCTGTTCTAGGGCTCTCAGTGTGA  
 AAAAGCGTGAATAGCAAACGACCTGTAAACCTAGACCTAAGGACCATCAAATCCCTGTCACCGCTTACACGTCCATT  
 CTCCACCGTATCTCTGCGTCACTCCTGTTCTCGGTATGCGGTGCTGCTGTTGCGCTCGACAAGTCGCTGAGTTCGGA  
 AGAAGGCTTCGAGCAGGTGAAGGCGTGCTGACCACTCCCTGGCCAAGCTGGTATCTGGGCTGCTGTCTGCGC  
 TGCTGTACCACCTGGTGCCGGTGTTCGCCACCTGGTCAATGACGCTGGCGGAG<sup>+413</sup>ACGCTGGAAGGCGGTAAG  
 CGTGGCTCCAAAATCGTATCGCCATCGCGTGGTGTGATGTTCTGGCGGGGATGGGTATGGTAACTAAACGTAC  
 AAACTTCTCGCGTCCGGCCTACGACTGGATGCCAGCGCTTTCGCGGTCGT<sup>+567</sup>TCTCGCGCT<sup>+576</sup>TATGTCAT<sup>+587</sup>TTCC  
 TGCTGGGCTA...

**e**

| Target | Position  | Query | Position | Energy    | Target | Position  | Query | Position | Energy   |
|--------|-----------|-------|----------|-----------|--------|-----------|-------|----------|----------|
| sdhC   | 118 - 133 | P1    | 73 - 88  | -14.21170 | sdhD   | 155 - 164 | P1    | 5 - 14   | -3.73939 |

**\* Input = +1 to +212**

Details of Selected Interaction

```

          117       134
          |         |
Target  5'-GAC...GAG...A...AAACG...CGG-3'
          |||||
Query   3'-UUU...CCCAG...A...GACGA...CAA-5'
          |         |
          89       72
        
```

Energy: -14.21170 kcal/mol  
 Hybridization Energy: -20.7  
 Unfolding Energy - Target: 3.57066  
 Unfolding Energy - Query: 2.91763

Position - Target RNA: 118 - 1  
 Position - Query RNA: 73 - 1  
 Position Seed - Target RNA: 122 - 1  
 Position Seed - Query RNA: 78 - 1

**\* Input = +413 to +587**

Details of Selected Interaction

```

          154       165
          |         |
Target  5'-ACS...GUGUG...UAUGU...CUA-3'
          |||||
Query   3'-UUU...CGACU...UCAA-5'
          |         |
          15       4
        
```

Energy: -3.73939 kcal/mol  
 Hybridization Energy: -17.0  
 Unfolding Energy - Target: 5.85863  
 Unfolding Energy - Query: 7.49198

Position - Target RNA: 155 - 164  
 Position - Query RNA: 5 - 14  
 Position Seed - Target RNA: 158 - 164  
 Position Seed - Query RNA: 5 - 11

## Supplementary Figure 7 - #7

### #7 iscS, PA3814 : cysteine desulfurase

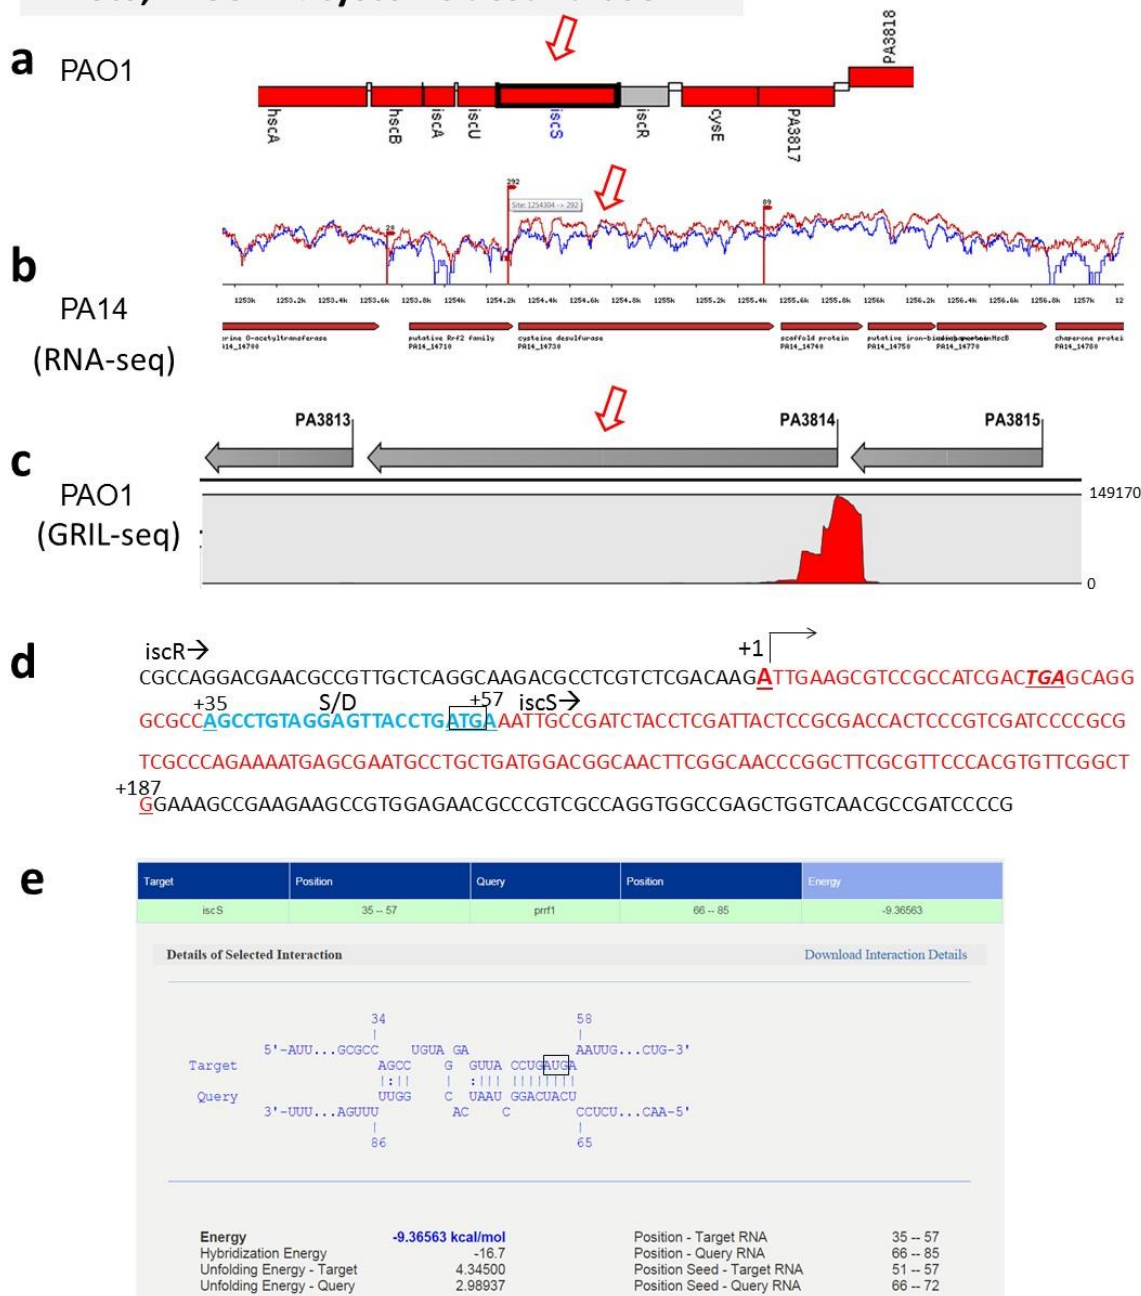

## Supplementary Figure 7 - #8

### #8 cysI, PA1838 : sulfite reductase

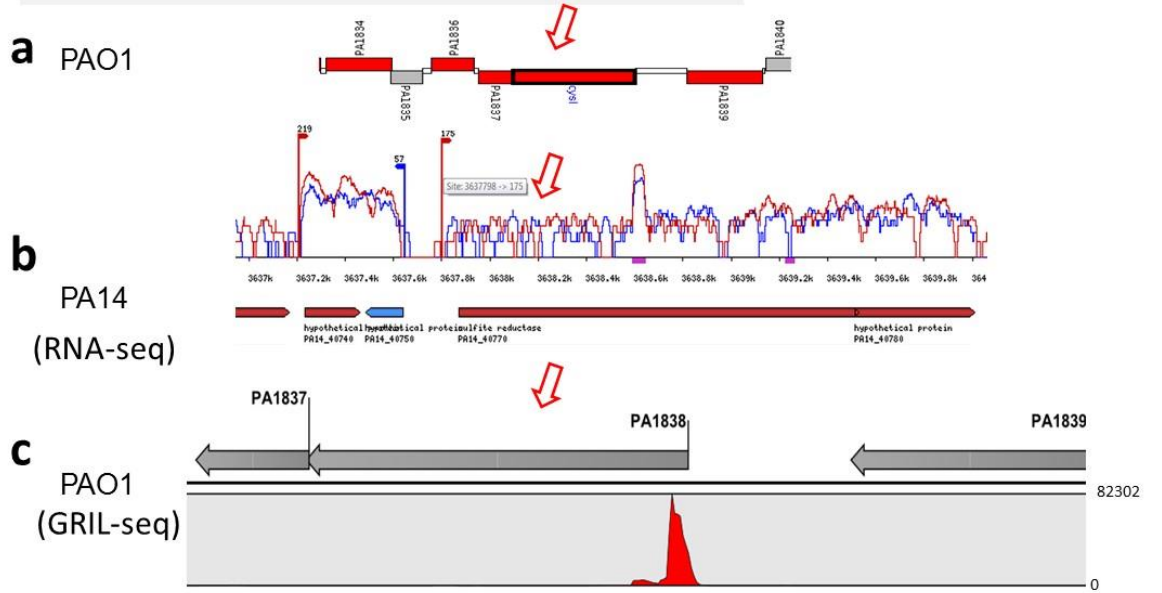

**d**

+1 →

TATACTCAAACATCACTTTTACGCATAAATATGAACTGGTATCGTGCGCCCACTCCGCGTGAGCGCGTAGCCGTGCGCG  
 CTGTTAACGCAGT**AAGCCGCATAGCTGA**CAGCAGGAATATTC**ATG**TACGTATACGACGAGTACGACCAACGGATCGT  
 CGAGGACCGCGTCAAGCAGTTCGCGACCCAGACCCGCCGTTACCTGGCGGGTGAATTGACCCGGTGAGGAGTCCGCC  
 CGCTGCGCCTGCAGAACGGTCTCTATATCCAGCGCTATGCCCGATGCTGCGCATGCGCGTTCCTATGGCTGCTCTCCT  
 CGCGCCAAGTGCAGAACTGGCGCAGATCGCCCGACTACGACAAGGGCTACGCCCACATCAGACCCGGCAGAAC  
 GTGCAGTTCAACTGGCCGAGCTGGAAGACGTGCCGAAATCCTGCCGAGCTGGCCACCGTGCAGATGCACG....

**e**

| Target | Position | Query | Position | Energy    |
|--------|----------|-------|----------|-----------|
| pa1838 | 44 – 59  | P1    | 69 – 86  | -11.12980 |

Details of Selected Interaction [Download Interaction Details](#)

```

      43           60
      |           |
Target 5'--ACU...GCAGU CA UAGCCUGA CAGCA...GUG-3'
      |           |
      ARGCCG    UAGCCUGA
      |||||    |||||
Query  3'--UUU...CAGUU ACUA ACUCC...CAA-5'
      |           |
      87           68
    
```

|                           |                    |                            |         |
|---------------------------|--------------------|----------------------------|---------|
| Energy                    | -11.12980 kcal/mol | Position - Target RNA      | 44 – 59 |
| Hybridization Energy      | -18.7              | Position - Query RNA       | 69 – 86 |
| Unfolding Energy - Target | 4.57904            | Position Seed - Target RNA | 53 – 59 |
| Unfolding Energy - Query  | 2.99112            | Position Seed - Query RNA  | 69 – 75 |



## Supplementary Figure 7 - #9

### #9 fdxA, PA4236 : ferredoxin I

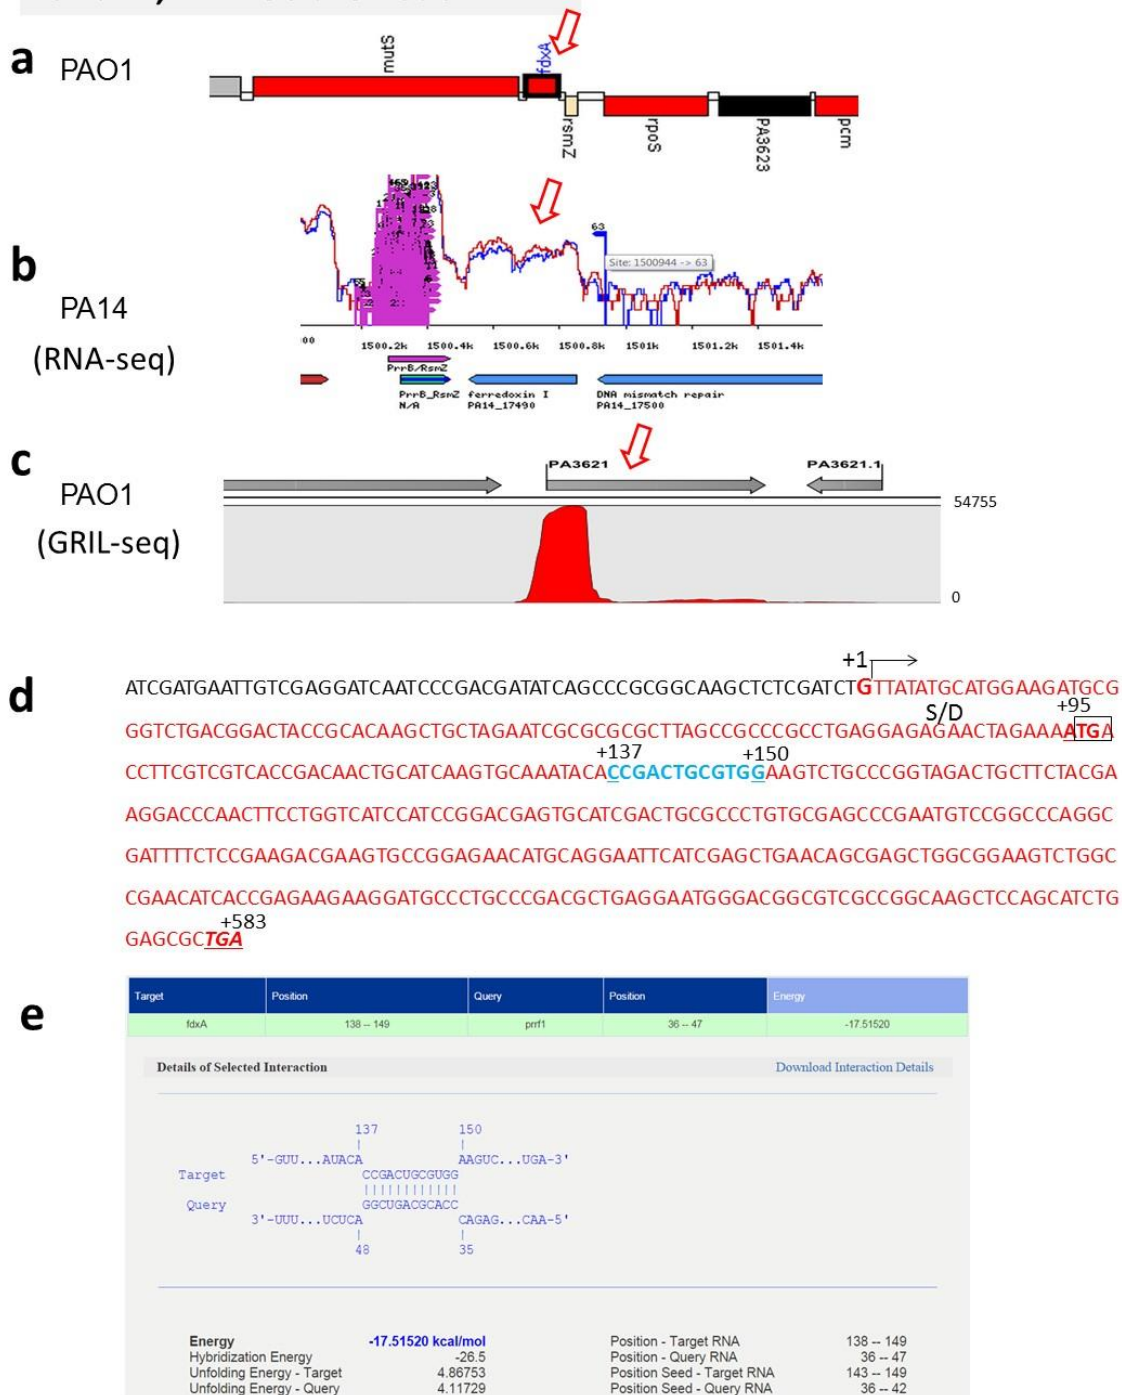

## Supplementary Figure 7 - #10

### #10 fadD1, PA3299 : long-chain-fatty-acid--CoA ligase

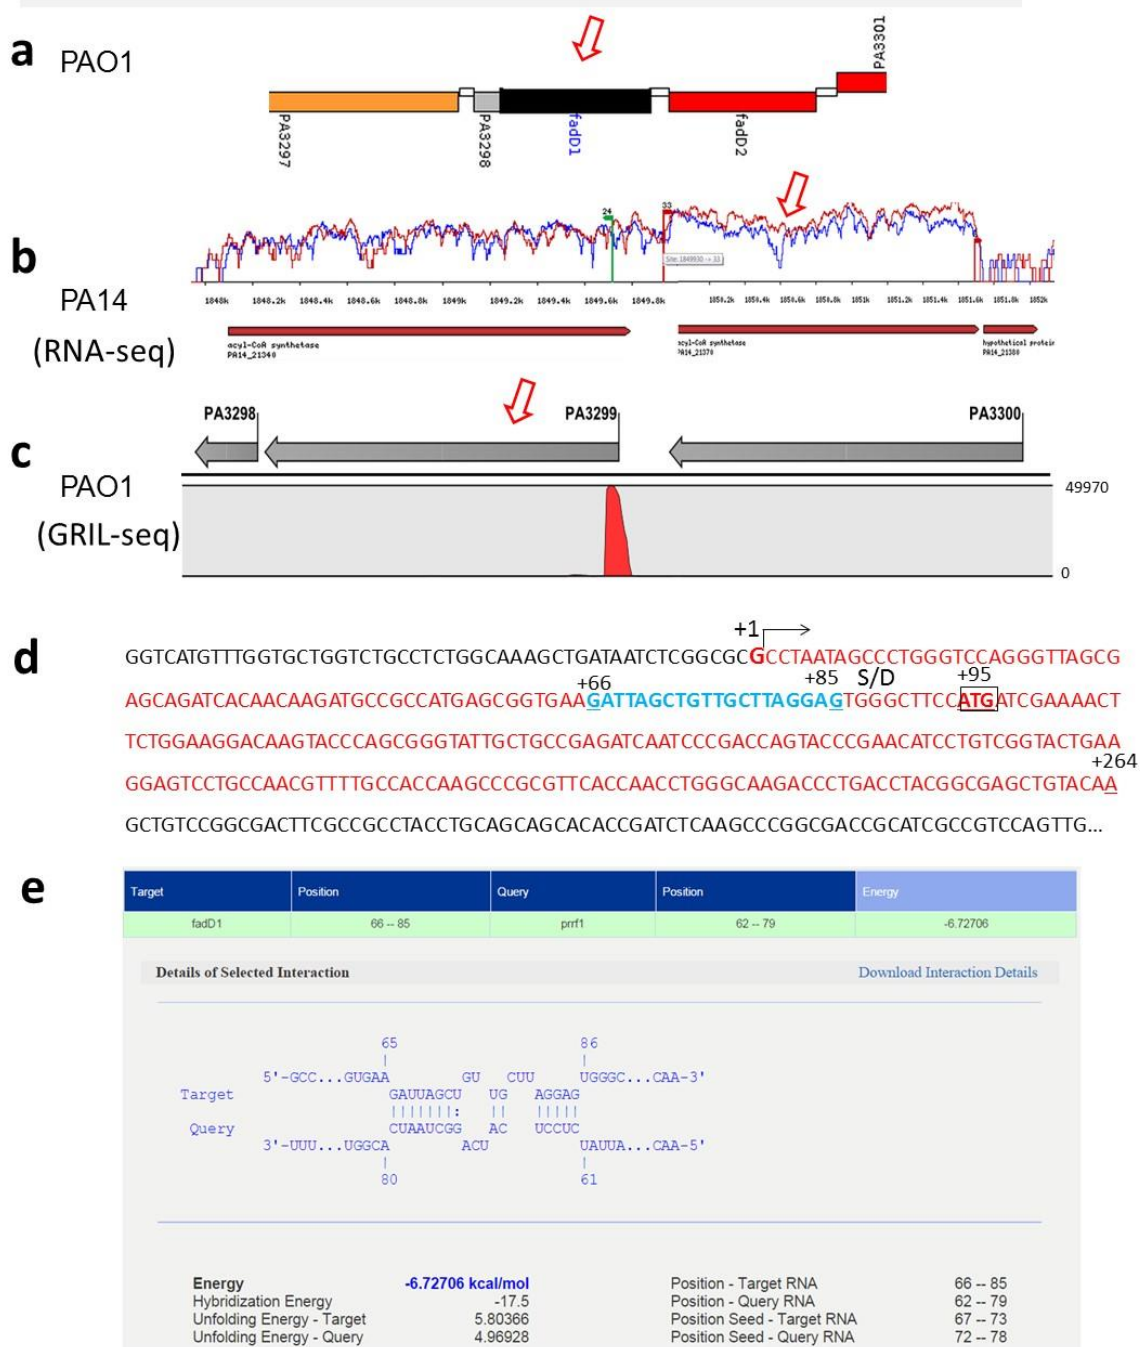

## Supplementary Figure 7 - #11

### #11 tagQ1, PA0070 : T6SS

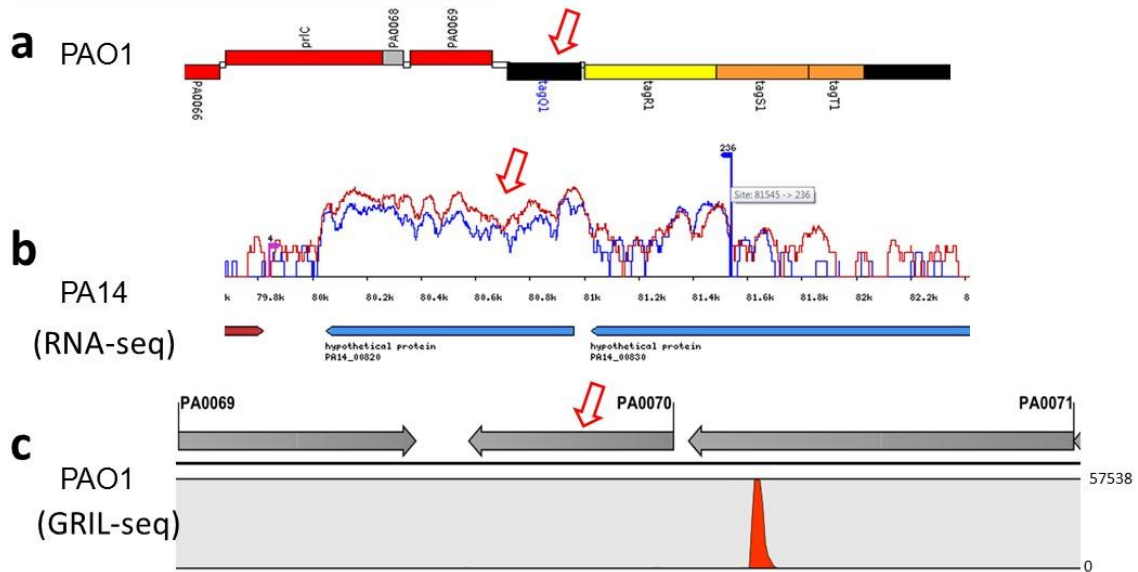

tagR → +1 →  
 TAGCGGCATTGACCGATGCCATCGATGACGCTCAAGATCCCACCAAGCAATTGGACGGAATCATTGCCGCCACCCGCG

**d**

ACCCGCAGATGCAGGCGCAGTTGGCCAGATAAACGAGGAACCTCAAGCGTAACGTTTCGTTGATCGCCGGCAGCGC  
 GAAGAGGCCCGGAAACCTGATACAGTCGGCGCACTGGTCGCCGAGACGATCAACAATAACAATACGCCTGAC  
 CAACCTCAAGAAGGACAGGGA<sup>+209</sup>GAAAGCCGTGGCAGCC<sup>+224</sup>AGGGATCAGGCGACCGCCAGCTCTATGCCGCGGCCATC  
 GCCAACGGGCGCAGCGCCCTCGATGGCGCATTGGCCATCTACATCGACAACCTCGCCACCGGCACCCGTTACACCGAC  
 GCGGTGATCCAGGCGCAGTTCAGGCGATCCAGGAAGAACTAATCGCAACCCGGTTCTGGCAAGAGCCTGTGCAA  
 GCGCGCAGCCCTGTTCTGCAAACACGTCGGAGATTATCGCCAGCAGCACCGGGCCGAGCCGGAGGCGGTATTGAAGG  
 AATTGCTCGCTCCAGCGGGCGTTGAAGGAGTTCCTCGCCGCCCTCTCGGCAGCCGGGCGGTTTCATCAAACAGGA<sup>S/D</sup>  
 GTGAGATGCAATGA<sup>+583</sup>GCCAAACCAGCGAAAACCGTTTGATCACCTCGGCAGCGCTACGCGCTGCTCTGTTGACCGCCAG  
 CGGCGTGTGCTCAGCGGCTGCGCCAGCAGCGGCTC<sup>+185</sup>G....

**e**

| Target | Position  | Query | Position | Energy    |
|--------|-----------|-------|----------|-----------|
| tagR1  | 209 - 224 | prf1  | 72 - 88  | -10.99560 |

Details of Selected Interaction [Download Interaction Details](#)

```

      208           225
      |             |
Target 5'-AGC...AGGGA      C      AGGGA...UCG-3'
          GAAAGCCGUGG  AGCC
          |||:||||:  |||
Query  3'-UUU...CCCAG      AA  ACUAC...CRA-5'
          |             |
          89           71
  
```

|                           |                           |                            |            |
|---------------------------|---------------------------|----------------------------|------------|
| Energy                    | <b>-10.99560 kcal/mol</b> | Position - Target RNA      | 209 -- 224 |
| Hybridization Energy      | -20.1                     | Position - Query RNA       | 72 -- 88   |
| Unfolding Energy - Target | 6.11307                   | Position Seed - Target RNA | 213 -- 219 |
| Unfolding Energy - Query  | 2.99137                   | Position Seed - Query RNA  | 78 -- 84   |

## Supplementary Figure 7 - #12

### #12 gloA1, PA3524 : lactoylglutathione lyase

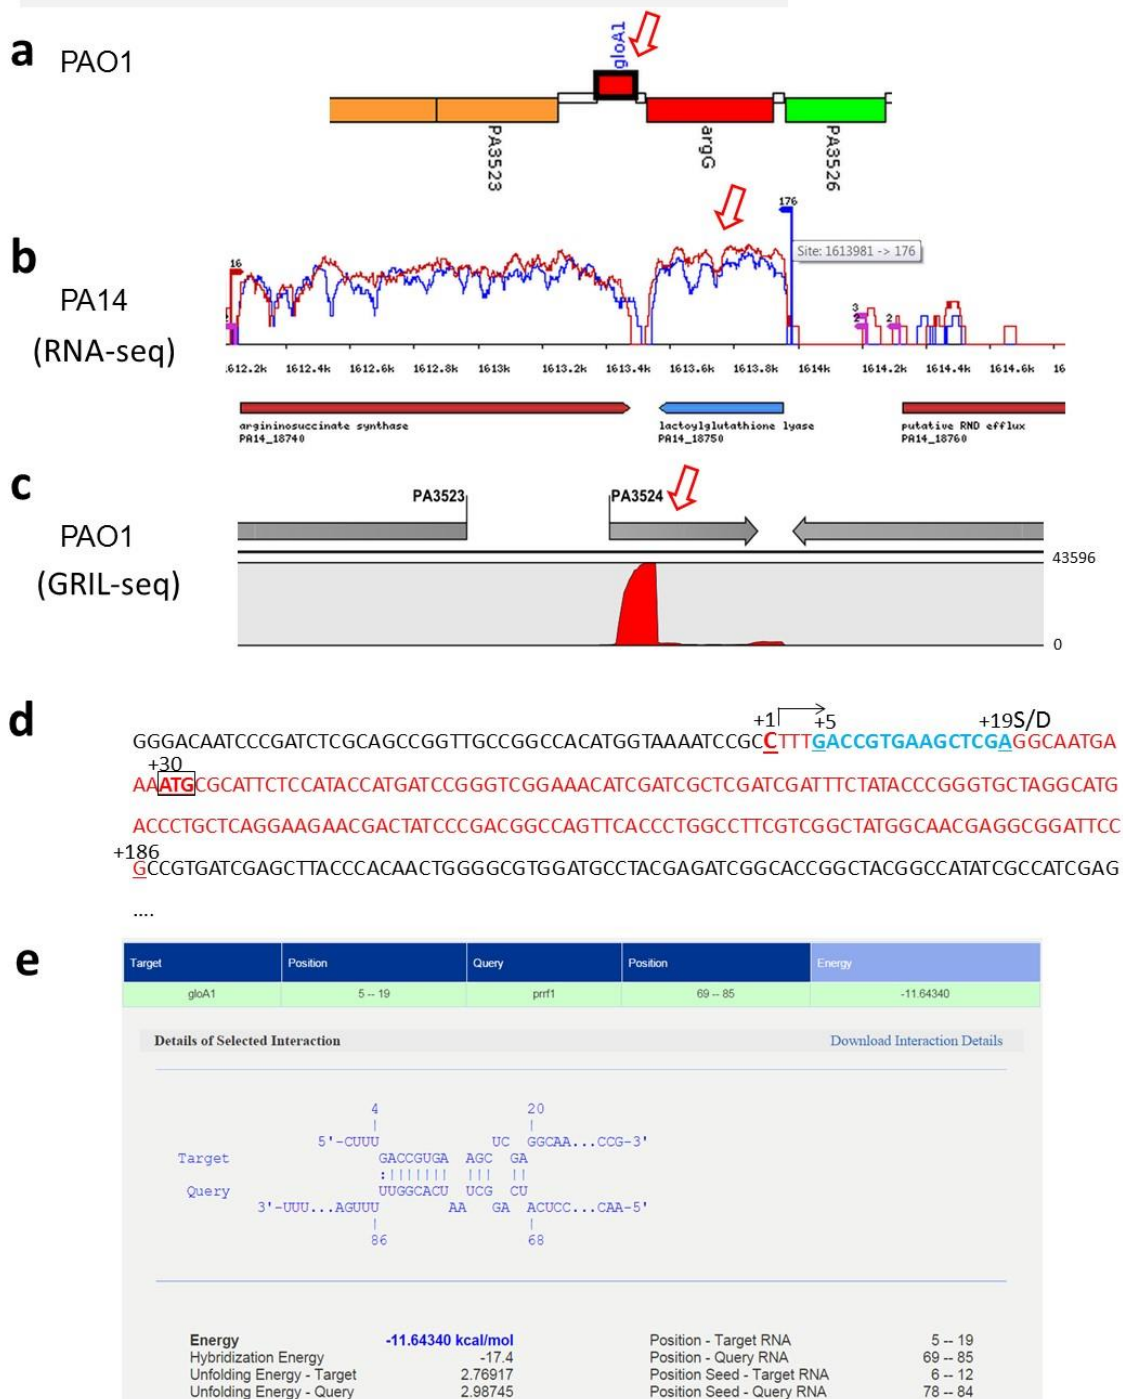

## Supplementary Figure 7 - #13

### #13 katA, PA4236 : catalase

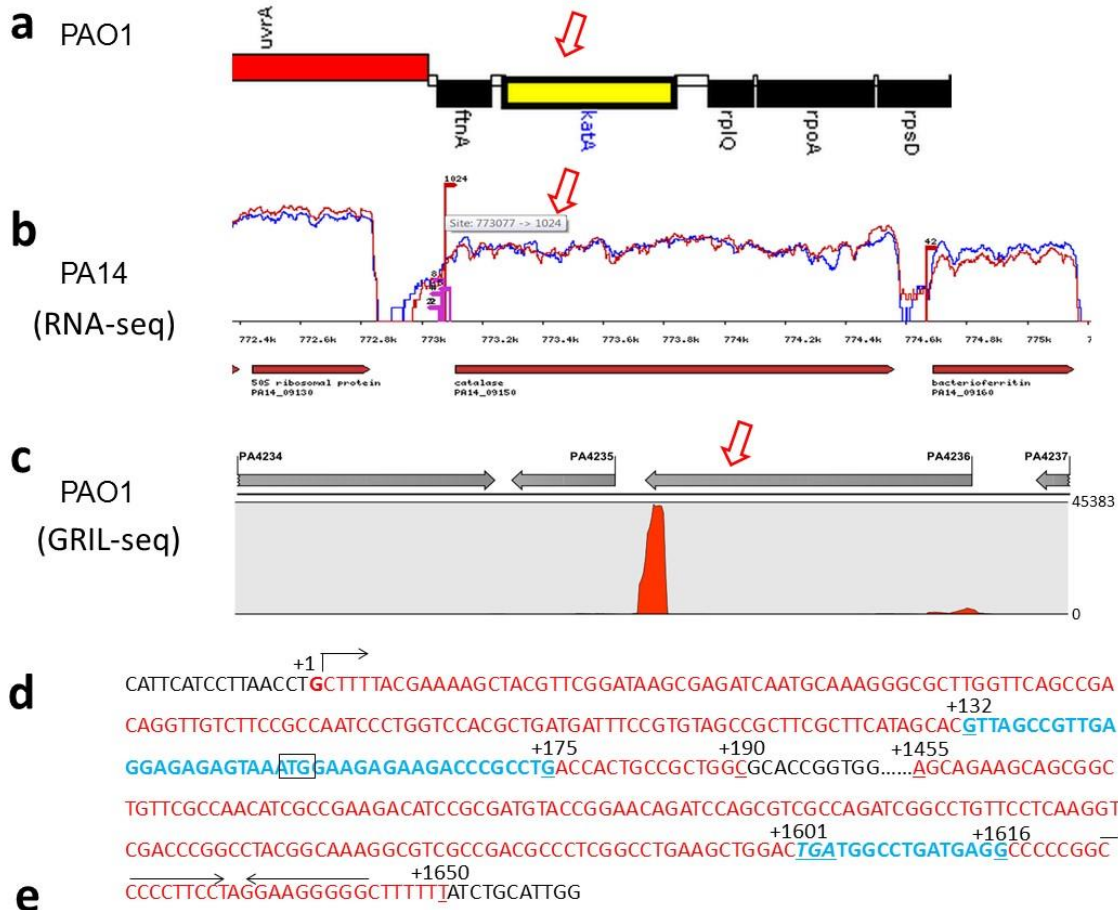

\* Input = +1 to +190

\* Input = +1455 to +1650

| Target                                                                                                                                                                                                                                                                                                                                                                                                                                                                                                                                                                                                                                                                                                                                                                                                                                                                                                                    | Position | Query | Position | Energy    |
|---------------------------------------------------------------------------------------------------------------------------------------------------------------------------------------------------------------------------------------------------------------------------------------------------------------------------------------------------------------------------------------------------------------------------------------------------------------------------------------------------------------------------------------------------------------------------------------------------------------------------------------------------------------------------------------------------------------------------------------------------------------------------------------------------------------------------------------------------------------------------------------------------------------------------|----------|-------|----------|-----------|
| katA:ur                                                                                                                                                                                                                                                                                                                                                                                                                                                                                                                                                                                                                                                                                                                                                                                                                                                                                                                   | 132-175  | prtI  | 41-78    | -16.22620 |
| <p>Details of Selected Interaction <a href="#">Download Interaction Details</a></p> <pre> 131                               176 Target 5'-GCU...AGCAC  GU  G  AAU  AAGAC  C  ACCAC...GGC-3'           GUUAGCC  UGAGGAGA  AGU  AAGAG  CCG  CUG           :       :       :   :   :   :  Query  3'-UUU...GGCAC  ACU  A  GA  A  U  GCACC...CAA-5'                                         79                               40                 </pre> <p>Energy: -16.22620 kcal/mol<br/>                     Hybridization Energy: -38.6<br/>                     Unfolding Energy - Target: 10.36200<br/>                     Unfolding Energy - Query: 12.01180</p> <p>Position - Target RNA: 132 - 175<br/>                     Position - Query RNA: 41 - 78<br/>                     Position Seed - Target RNA: 142 - 148<br/>                     Position Seed - Query RNA: 61 - 67</p>                               |          |       |          |           |
| katA:ur                                                                                                                                                                                                                                                                                                                                                                                                                                                                                                                                                                                                                                                                                                                                                                                                                                                                                                                   | 147-162  | prtI  | 64-80    | -15.53880 |
| <p>Details of Selected Interaction <a href="#">Download Interaction Details</a></p> <pre> 146                               163 Target 5'-AGC...UGGAC  UGAU  GGCCGAGAGG  CCCCC...UUU-3'           :   :   :   :   :   :   :   :   :   :   :   :   :   :   :   :   :   :   :   :   :   :  Query  3'-UUU...UGGAC  A  UCUAU...CAA-5'                                                                                      81                               63                 </pre> <p>Energy: -15.53880 kcal/mol<br/>                     Hybridization Energy: -25.6<br/>                     Unfolding Energy - Target: 7.11648<br/>                     Unfolding Energy - Query: 2.94474</p> <p>Position - Target RNA: 147 - 162<br/>                     Position - Query RNA: 64 - 80<br/>                     Position Seed - Target RNA: 156 - 162<br/>                     Position Seed - Query RNA: 64 - 70</p> |          |       |          |           |

## Supplementary Figure 7 - #14

### #14 PA1069 : hypothetical protein

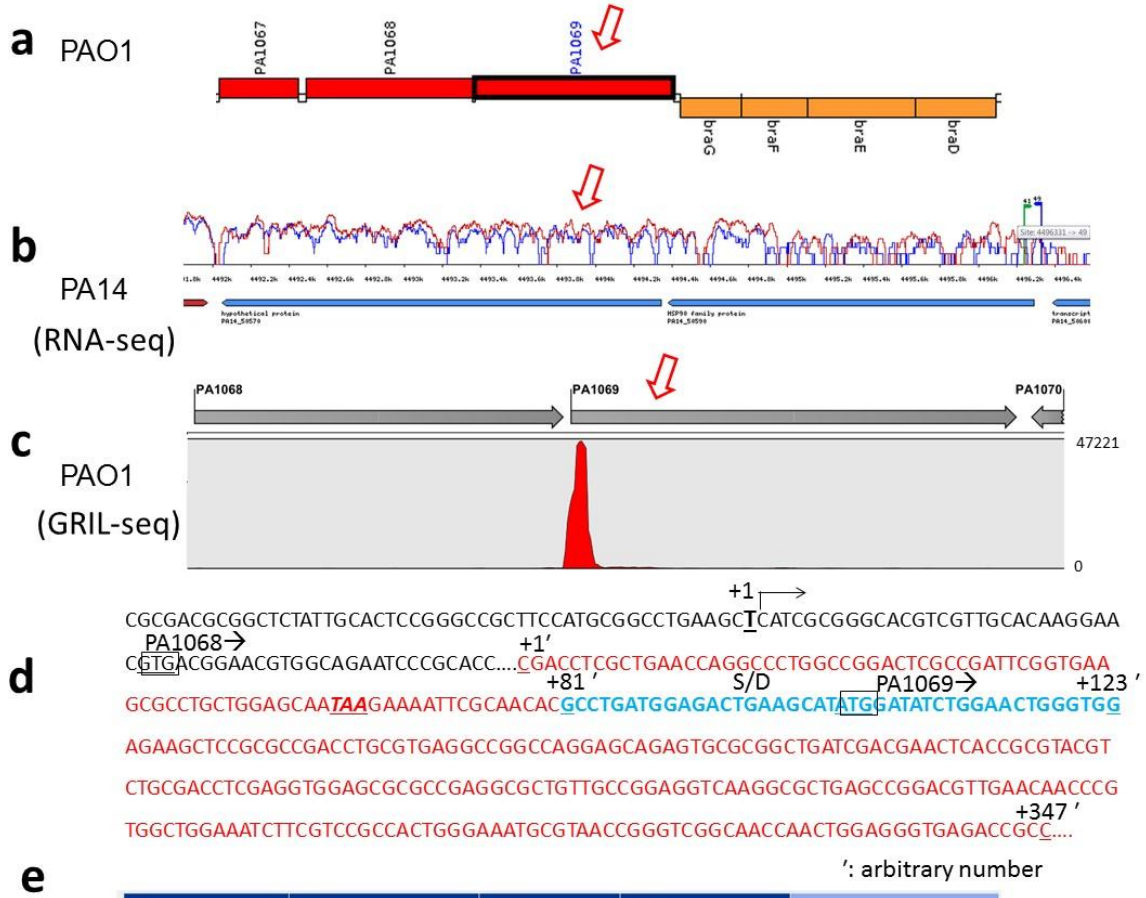

**e**

| Target | Position  | Query | Position | Energy    |
|--------|-----------|-------|----------|-----------|
| pa1069 | 81 -- 123 | prf1  | 36 -- 74 | -14.42270 |

Details of Selected Interaction [Download Interaction Details](#)

```

          80          124
          |          |
Target  5'-CGA...AACAC      CACAU AUA GA G AGAAG...GCC-3'
          |          |          |          |          |
          GCCUGAU GGAGA CUGAAG GS UCUG ACUG GUGG
          |||||    |||||    |||||    :|  |||  ||||
Query   3'-UUU...CUAAU CU AUUA      UC AGGC UGAC CACC
          |          |          |          |          |
          75          35
    
```

|                           |                           |                            |           |
|---------------------------|---------------------------|----------------------------|-----------|
| <b>Energy</b>             | <b>-14.42270 kcal/mol</b> | Position - Target RNA      | 81 -- 123 |
| Hybridization Energy      | -37.2                     | Position - Query RNA       | 36 -- 74  |
| Unfolding Energy - Target | 9.57013                   | Position Seed - Target RNA | 81 -- 87  |
| Unfolding Energy - Query  | 13.20720                  | Position Seed - Query RNA  | 68 -- 74  |

## Supplementary Figure 7 - #15

### #15 PA3262.1 : Asp tRNA

**a** PAO1

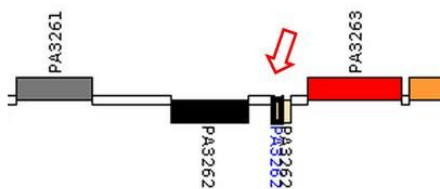

**b** PA14  
(RNA-seq)

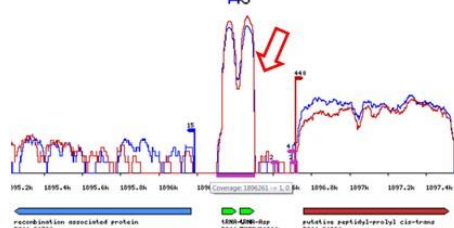

**c** PAO1  
(GRIL-seq)

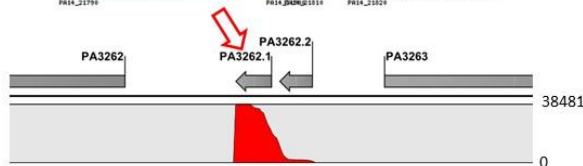

**d**

GCCAGGGGCCAAATCGCTCCGTAGAATGCGCCCA<sup>+1</sup>CTTCGAGAGTGAAGG<sup>+16 +17</sup>GTGATTAGCTCAGCTGGGAGAGCATCT  
<sup>+66</sup>GCCTTACAAGCAGAGGGTCCGG<sup>+66</sup>GTTTCGATCCCCTCATCACCCACCAATCTCGCAAGTTACGCG<sup>+199</sup>CAGCGGTAGTTTCAG  
 TCGGTTAGAATACCGGCCTGTCACGCCGGGGTTCGCGGGTTCGAGTCCCGTCCGCTGCGCCATTCCTTCCTCAGCTG<sup>+199</sup>  
 ATCTCTTGCCTTCCTCCGCTTCATAATTCGACTTTTTTCGACGCTTCCTTCCACTGTTCTTGTGCTCCTCGTCCACGC

tRNA-val<sup>3</sup>→  
 tRNA-asp<sup>4</sup>→

**e**

| Target  | Position | Query | Position | Energy   |
|---------|----------|-------|----------|----------|
| pat1750 | 17 – 66  | prf1  | 39 – 81  | -9.37551 |

Details of Selected Interaction [Download Interaction Details](#)

```

      16                               67
      |                               |
Target 5'-ACU...GAAGG|CAGCU  GC  CCUACAAGCA  G  GUUCG...UGU-3'
          GUGAUUAGCU  GGGAGA  AUCUG  GAGGGUC  GCG
          |||||:      |||||  |||||  |||||  |||
Query  3'-UUU...UUUGG|ACUAC  AU  GCUGA  ACCCA...CAA-5'
          |                               |
          82                               38
    
```

|                           |                          |                            |         |
|---------------------------|--------------------------|----------------------------|---------|
| Energy                    | <b>-9.37551 kcal/mol</b> | Position - Target RNA      | 17 – 66 |
| Hybridization Energy      | -39.6                    | Position - Query RNA       | 39 – 81 |
| Unfolding Energy - Target | 16.74420                 | Position Seed - Target RNA | 56 – 62 |
| Unfolding Energy - Query  | 13.48030                 | Position Seed - Query RNA  | 47 – 53 |

## Supplementary Figure 7 - #16

### #16 PA3094.2: Asp tRNA

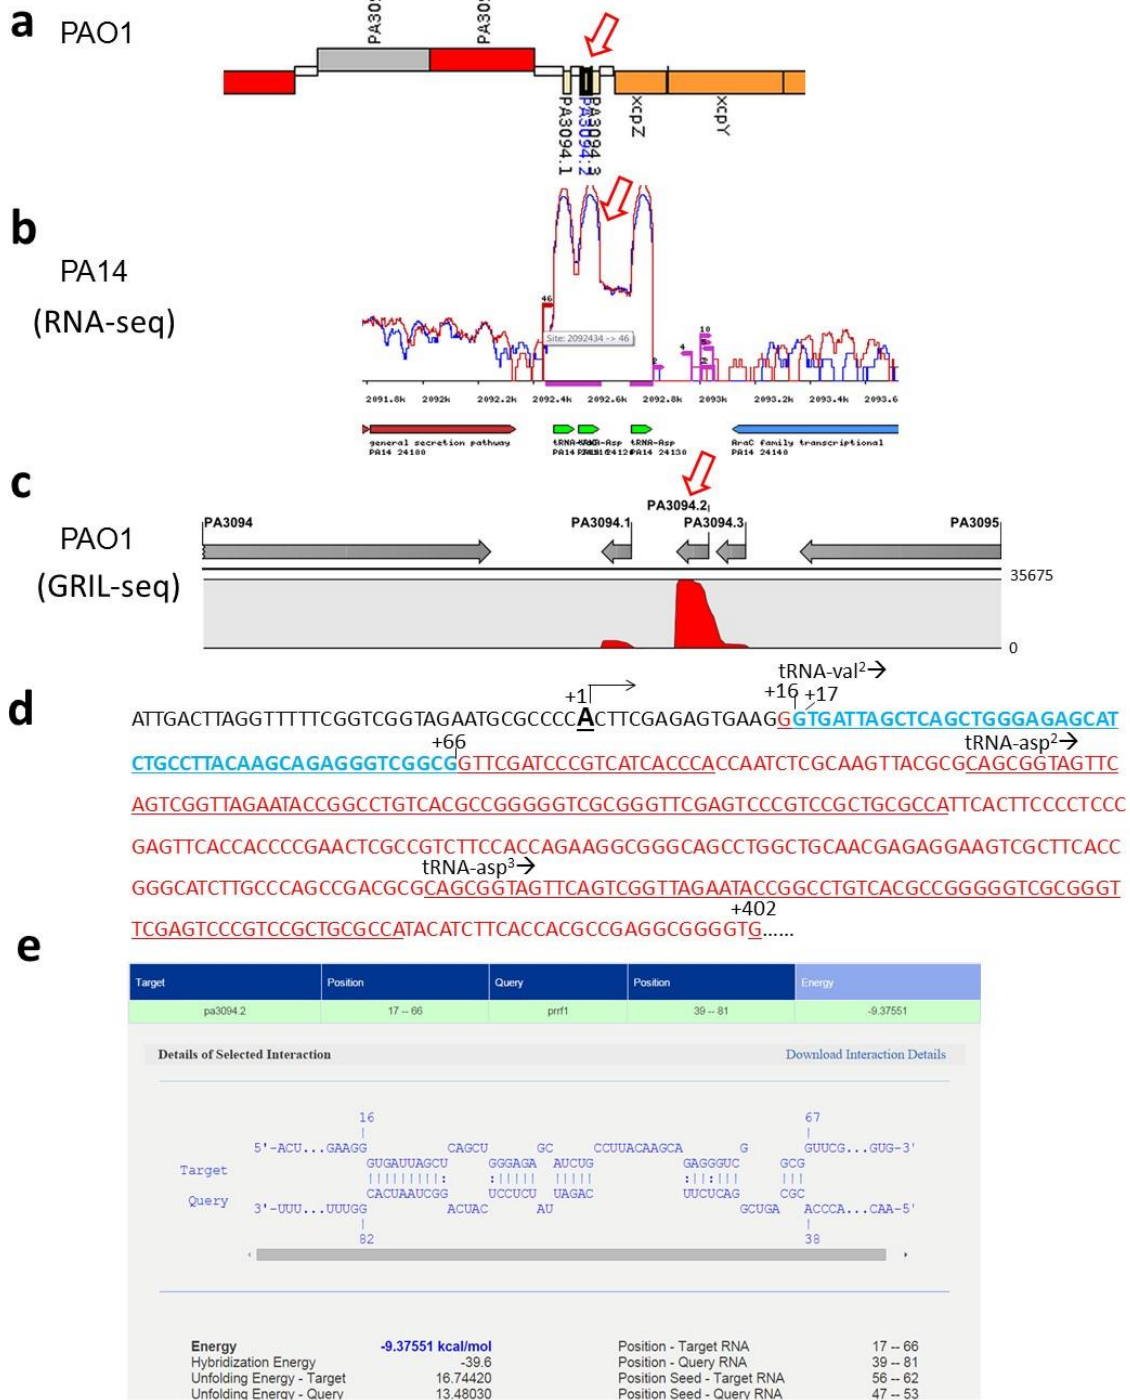



## Supplementary Figure 7 - #17

### #17 PA1750 : phospho-2-dehydro-3-deoxyheptonate aldolase

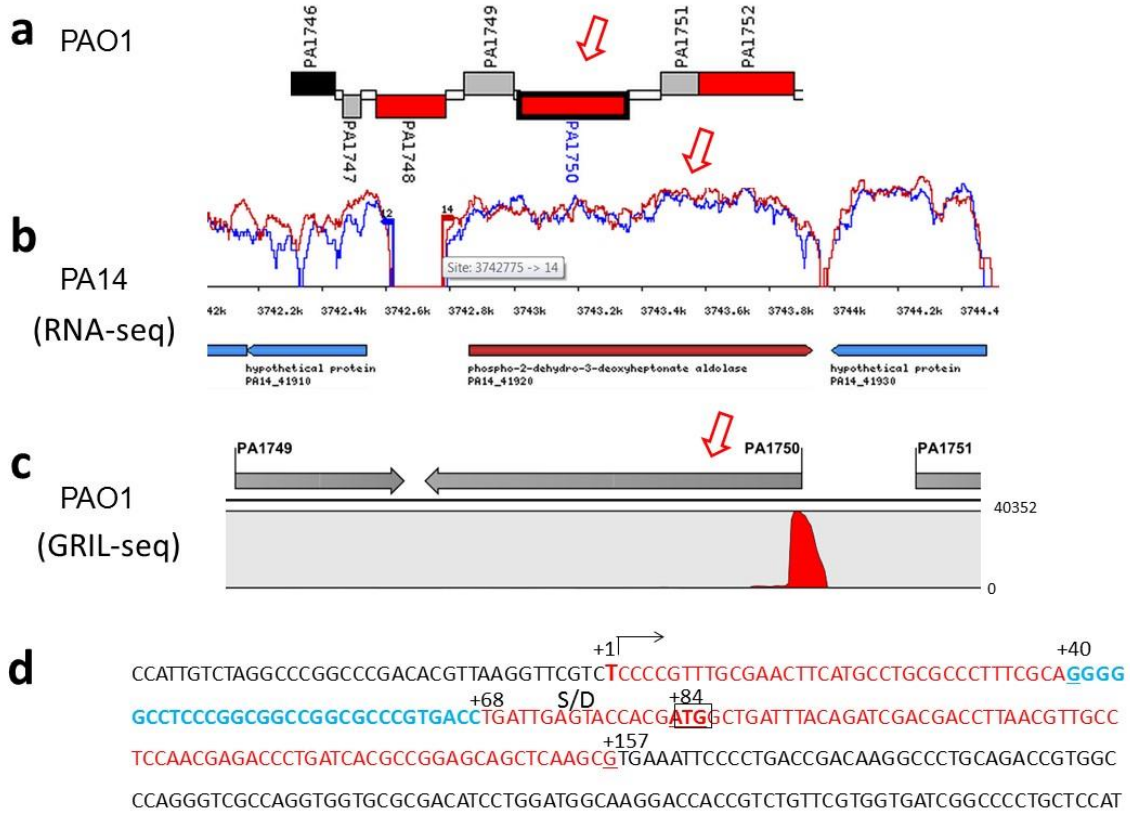

**e**

| Target | Position | Query | Position | Energy   |
|--------|----------|-------|----------|----------|
| pa1750 | 40 -- 68 | prf1  | 5 -- 37  | -5.71146 |

Details of Selected Interaction [Download Interaction Details](#)

```

          39                               69
Target  5'-UCC...GCAGG C C G G C C UGAUU...GCG-3'
          GGG CUC CCGC GCCGGC C CGUGACC
          ||| ||| :|| :||| | ||: |||
Query   3'-UUU...ACGCA A A AA ACUA A UCAA-5'
          38                               4
    
```

|                           |                          |                            |          |
|---------------------------|--------------------------|----------------------------|----------|
| <b>Energy</b>             | <b>-5.71146 kcal/mol</b> | Position - Target RNA      | 40 -- 68 |
| Hybridization Energy      | -41.3                    | Position - Query RNA       | 5 -- 37  |
| Unfolding Energy - Target | 15.89080                 | Position Seed - Target RNA | 62 -- 68 |
| Unfolding Energy - Query  | 19.69770                 | Position Seed - Query RNA  | 5 -- 11  |

## Supplementary Figure 7 - #18

### #18 trxB2, PA0849 : Thioredoxin reductase

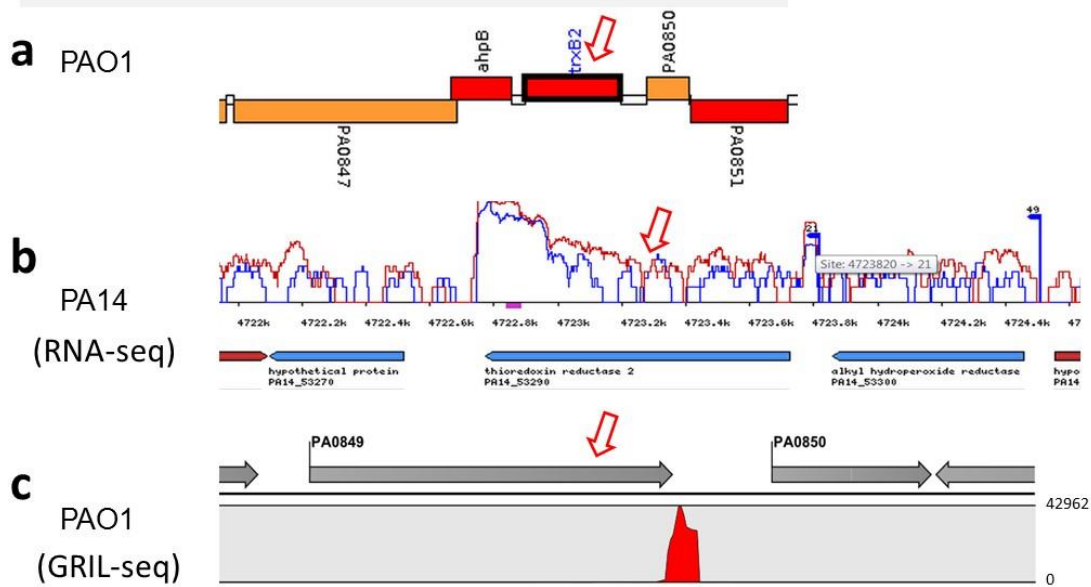

**d**

```

GCTGCCGGGCGCGAAGTGTGCCGACCGACCTT+1TTCGGGGCGACCGCTCTTCCAAGCCTTCCCCATGTGCTTTGGTGGCC
+83CCGTTTTATTTCGCGCCGACGCTGATGTCGGCS/DAGGAGTCCGAC+93GAGCATGCCGATACCTCCGCCACGCCCGAGTGATCATC
CTCGTTCCGGTCCCGCGGTTACAGCGCGGCTGTCTACGCCGCGCGCCAACCTCAAGCCG+196CTGCTGATCACC GG...
..CCCTGAAGGACGGCTACCTGG+887IGGTCAACGGCGGGCGGAAGGCAACGCCACCGCGACCAACGTACCGGGTGTGTTCCGCC
CCGGCGACGTGGCCGACCAAGTCTACGCCAGGCGATCACTCGGCCGGCGCGGCTGCATGGCCGCGTGGATGTGGAGCG
+1037CTATCTCGATTGCTCTGATGAGAAGACAGCCCTGAGTGTGCGTG+1075CAAGGAAGGCCCGCTTCGCGGGGCTTTCTT+1108IGTC
CGTTCGGAAGGCCGCGGGCAGTGGTCCGGTTA
    
```

**e**

\* Input = +1 to +196

| Target | Position | Query | Position | Energy   |
|--------|----------|-------|----------|----------|
| trxB2  | 83-93    | pef1  | 43-53    | -7.85437 |

Details of Selected Interaction

```

      82      94
      |      |
Target 5'-UUU...UUGGUC      GAGAU...CUU-3'
      |      |
      AGGAGTCCGAC
      |||||
Query  3'-UUU...UAGAC      AGUCA...CAA-5'
      |      |
      54      42
    
```

Energy: **-7.85437 kcal/mol**

Hybridization Energy: -19.5  
 Unfolding Energy - Target: 5.91240  
 Unfolding Energy - Query: 5.73323

Position - Target RNA: 83 - 93  
 Position - Query RNA: 43 - 53  
 Position Seed - Target RNA: 87 - 93  
 Position Seed - Query RNA: 43 - 49

\* Input = +887 to +1108

| Target | Position | Query | Position | Energy    |
|--------|----------|-------|----------|-----------|
| trxB2  | 150-188  | pef1  | 37-75    | -12.31080 |

Details of Selected Interaction

```

      149      189
      |      |
Target 5'-UGG...AUUCU      C U      A      CAGUCUU      GAUU      GCUUCUUG      CRAAG...UUU-3'
      |      |      |      |      |      |
      GAUU      GC      CCGAUGAG      AGA      GAUU      GCUUCUUG
      |||||
Query  3'-UUU...UUGGUC      U      C      AUTAGACUU      GGC      CCAGA...CAA-5'
      |      |
      80      36
    
```

Energy: **-12.31080 kcal/mol**

Hybridization Energy: -37.5  
 Unfolding Energy - Target: 12.92190  
 Unfolding Energy - Query: 12.25730

Position - Target RNA: 150 - 188  
 Position - Query RNA: 37 - 75  
 Position Seed - Target RNA: 182 - 188  
 Position Seed - Query RNA: 37 - 43

## Supplementary Figure 7 - #19

### #19 lis, PA3996 : lipoate synthase

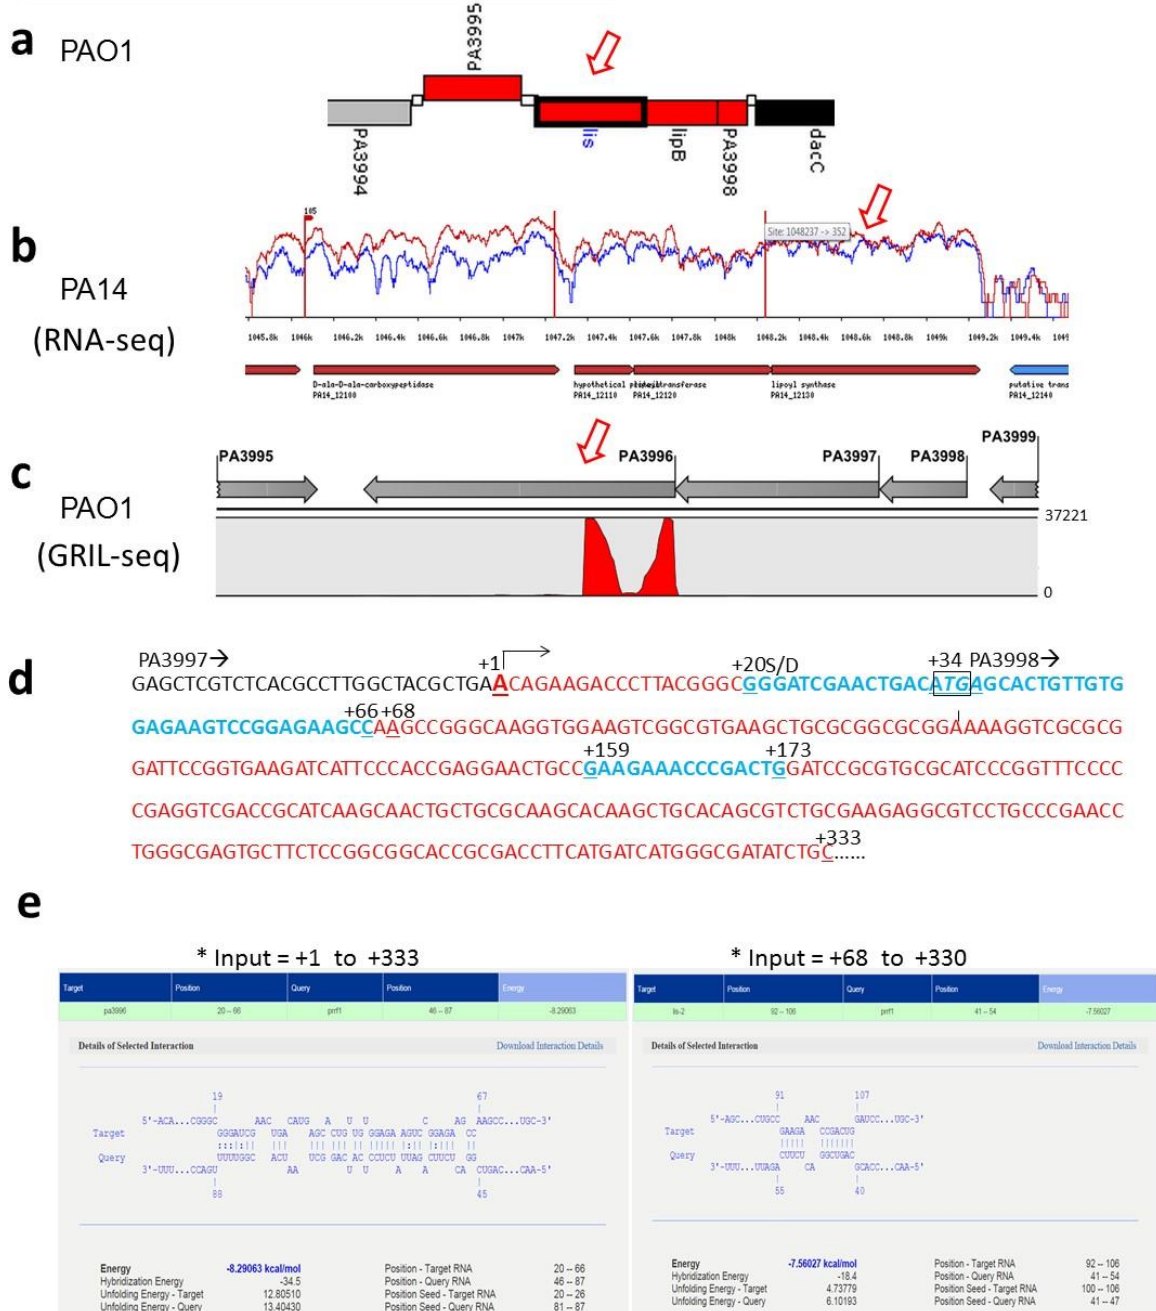

## Supplementary Figure 7 - #20

### #20 PA4423 : putative lipoprotein

**a** PAO1

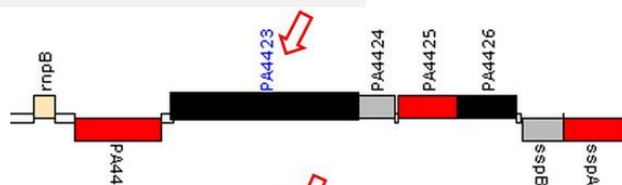

**b** PA14  
(RNA-seq)

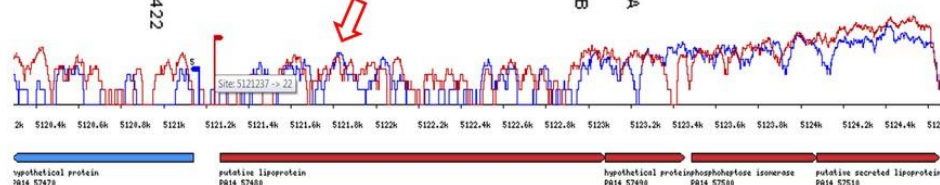

**c** PAO1  
(GRIL-seq)

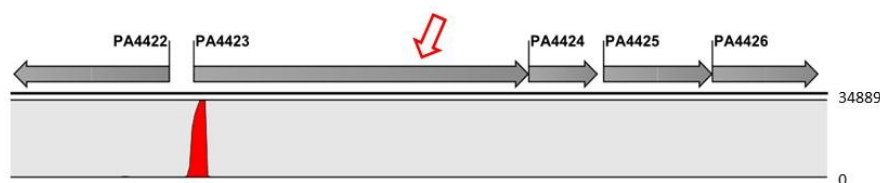

**d**

```

CCATCGACCCGAGGCGGGCCTCCGGTACAATCGGCGACT+1CTTCGTGAATGCGCCATGAGAAAGCCCTATS/DATGATCGCTT+31
GCCTGCGTCCGCTTCTGCTCTGATCCTGGCCGTCTGCTGACCGCCTGCGCGACC+90TCGTCCAATTCGGACTGGCGCA+96
ACTTCCCCGTACGCCGAATGCCAGCATCGAGCAGTTGTTGCA+161ACAGGCCAGCCAGAGCAAGCCCCAGGAAGCGGCGC
TGCTGCGCTCTCGGCAGCGGACCTTGCTACCAGCAAAGGACCTCGCCAGGTCCACCGCCATCCTGGGACAGATTC
CGCTGAAAAGCCTGAAGCCGGCCAGCAGGTCTTCGCCAGCACCTGAACGCCGAA
    
```

**e**

| Target | Position | Query | Position | Energy   |
|--------|----------|-------|----------|----------|
| pa4423 | 90 -- 96 | prf1  | 5 -- 11  | -5.10220 |

Details of Selected Interaction [Download Interaction Details](#)

```

          89       97
Target  5'-UCU...GCCUG      UCGUC...CGA-3'
          |||
Query   3'-UUU...CUAGA      UCAA-5'
          |||
          12       4
    
```

|                           |                          |                            |          |
|---------------------------|--------------------------|----------------------------|----------|
| <b>Energy</b>             | <b>-5.10220 kcal/mol</b> | Position - Target RNA      | 90 -- 96 |
| Hybridization Energy      | -14.5                    | Position - Query RNA       | 5 -- 11  |
| Unfolding Energy - Target | 3.51155                  | Position Seed - Target RNA | 90 -- 96 |
| Unfolding Energy - Query  | 5.88625                  | Position Seed - Query RNA  | 5 -- 11  |

## Supplementary Figure 7 - #21

### #21 PA4454 : conserved hypothetical protein

**a** PAO1

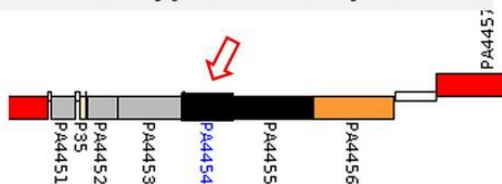

**b** PA14  
(RNA-seq)

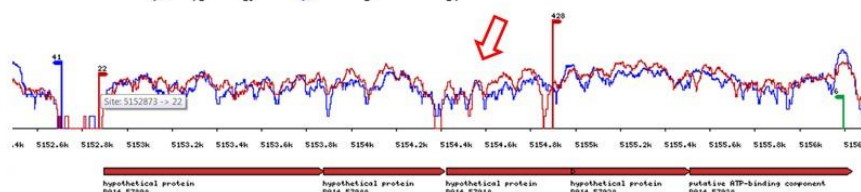

**c** PAO1  
(GRIL-seq)

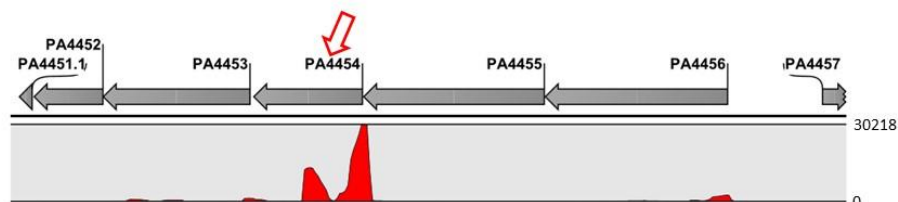

**d**

```

+1' PA4453→
AAGGAATCAGCCGGGCGACGACCCGGACCGTGGTCTATGCCTCCCTGCGGGTGTGGGGCTCGACTTCATCTGACTG
+79' S/D PA4454→
CTTGATGTTTGAGATTTCGAATGCAAAACCCGCACCTGAAATCGGTGTGGCCCTGTTCTCTGCGCCGGCTGCT
GGCCCTGTTGCTGCTGGCCCTGCGGGTCAGCGGCCTGAGCGTGGCAACGCCGGCGATACTACAAGGTCTACGCCTA
CTTCGACAACATCGCCGGTGTACCGTGC CGGCAAGGTCACCCCTGCCGGCGTGACGATCGGCAAGGTGACGCGGG
+380'
TCGACCTGGATCGCGACAGCTACTGTCGCGTGACCATGGAGATCAACCAGAACGTGAACAACCTGCCGGTGCATT
    
```

' : arbitrary number

**e**

| Target | Position | Query | Position | Energy   |
|--------|----------|-------|----------|----------|
| pa4454 | 71 – 79  | prf1  | 40 – 48  | -8.40039 |

Details of Selected Interaction [Download Interaction Details](#)

```

          70      80
          |      |
Target  5'-AAG...UUCAU  UUUGA...CUG-3'
          |      |
          UGACUGC
          ||:|||||
Query   3'-UUU...UUCUC  CACCC...CAA-5'
          |      |
          49      39
    
```

|                           |                          |                            |          |
|---------------------------|--------------------------|----------------------------|----------|
| <b>Energy</b>             | <b>-8.40039 kcal/mol</b> | Position - Target RNA      | 71 -- 79 |
| Hybridization Energy      | -14.9                    | Position - Query RNA       | 40 -- 48 |
| Unfolding Energy - Target | 2.38923                  | Position Seed - Target RNA | 73 -- 79 |
| Unfolding Energy - Query  | 4.11038                  | Position Seed - Query RNA  | 40 -- 46 |

## Supplementary Figure 7 - #22

### #22 fabA, PA1610 : 3-hydroxydecanoyl-ACP dehydratase

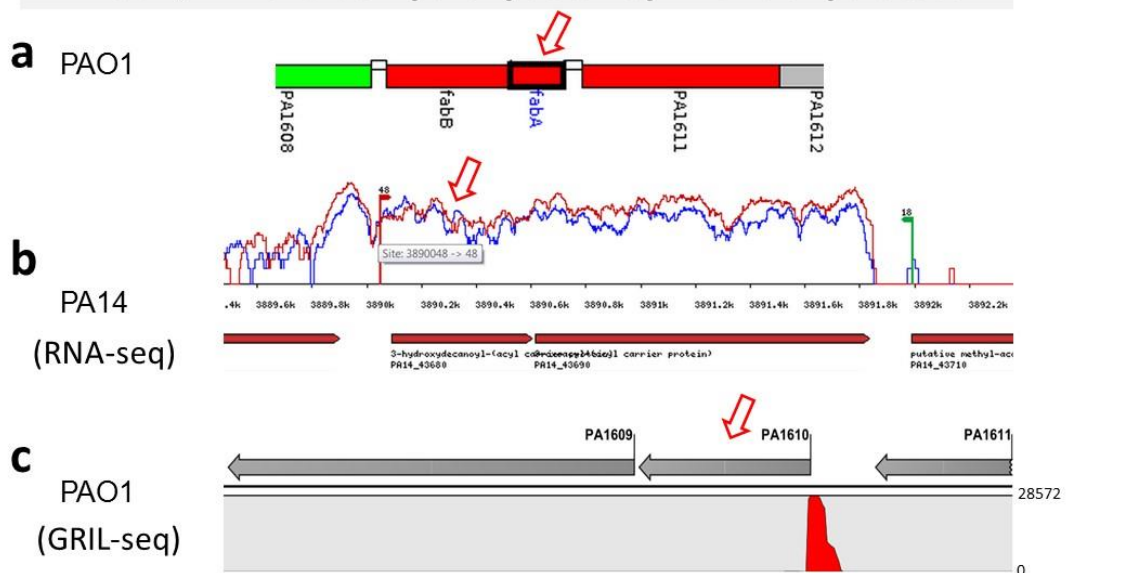

**d**

```

TACAATAACCCGGCGCGACGGCCGCTGGACGA+1ACCGCCACAACCTGCAGTTCAGGGATTT+29ITGAGGAGCTCGCS/DATG+42
ACCAAACAACACGCCTTACCCGAGAAAGACCTGCTGCGCTGCAGTCGCGGCAGCTGTTGCGCCGGGTAACGCGCA
+138
ACTTCCCGCCCCAACATGCTGATGATCGATCGATCGTTACATCAGCGATGTCGCGGCAAGTATGGCAAG.....
    
```

**e**

| Target | Position | Query | Position | Energy   |
|--------|----------|-------|----------|----------|
| pa1610 | 29 -- 42 | prf1  | 43 -- 57 | -4.55214 |

Details of Selected Interaction [Download Interaction Details](#)

```

          28           43
          |           |
Target  5'-ACC...GGAUU      CU  AUGAC...AUG-3'
          |           |
          UUUUGAGGAG  CG C
          |||:|:|:|  || |
Query   3'-UUU...CUAUU      AG  U  ACGCA...CAA-5'
          |           |
          58           42
    
```

|                           |                          |                            |          |
|---------------------------|--------------------------|----------------------------|----------|
| Energy                    | <b>-4.55214 kcal/mol</b> | Position - Target RNA      | 29 -- 42 |
| Hybridization Energy      | -15.2                    | Position - Query RNA       | 43 -- 57 |
| Unfolding Energy - Target | 4.37064                  | Position Seed - Target RNA | 31 -- 37 |
| Unfolding Energy - Query  | 6.27721                  | Position Seed - Query RNA  | 49 -- 55 |

## Supplementary Figure 7 - #23

### #23 oprF, PA1777 : porin

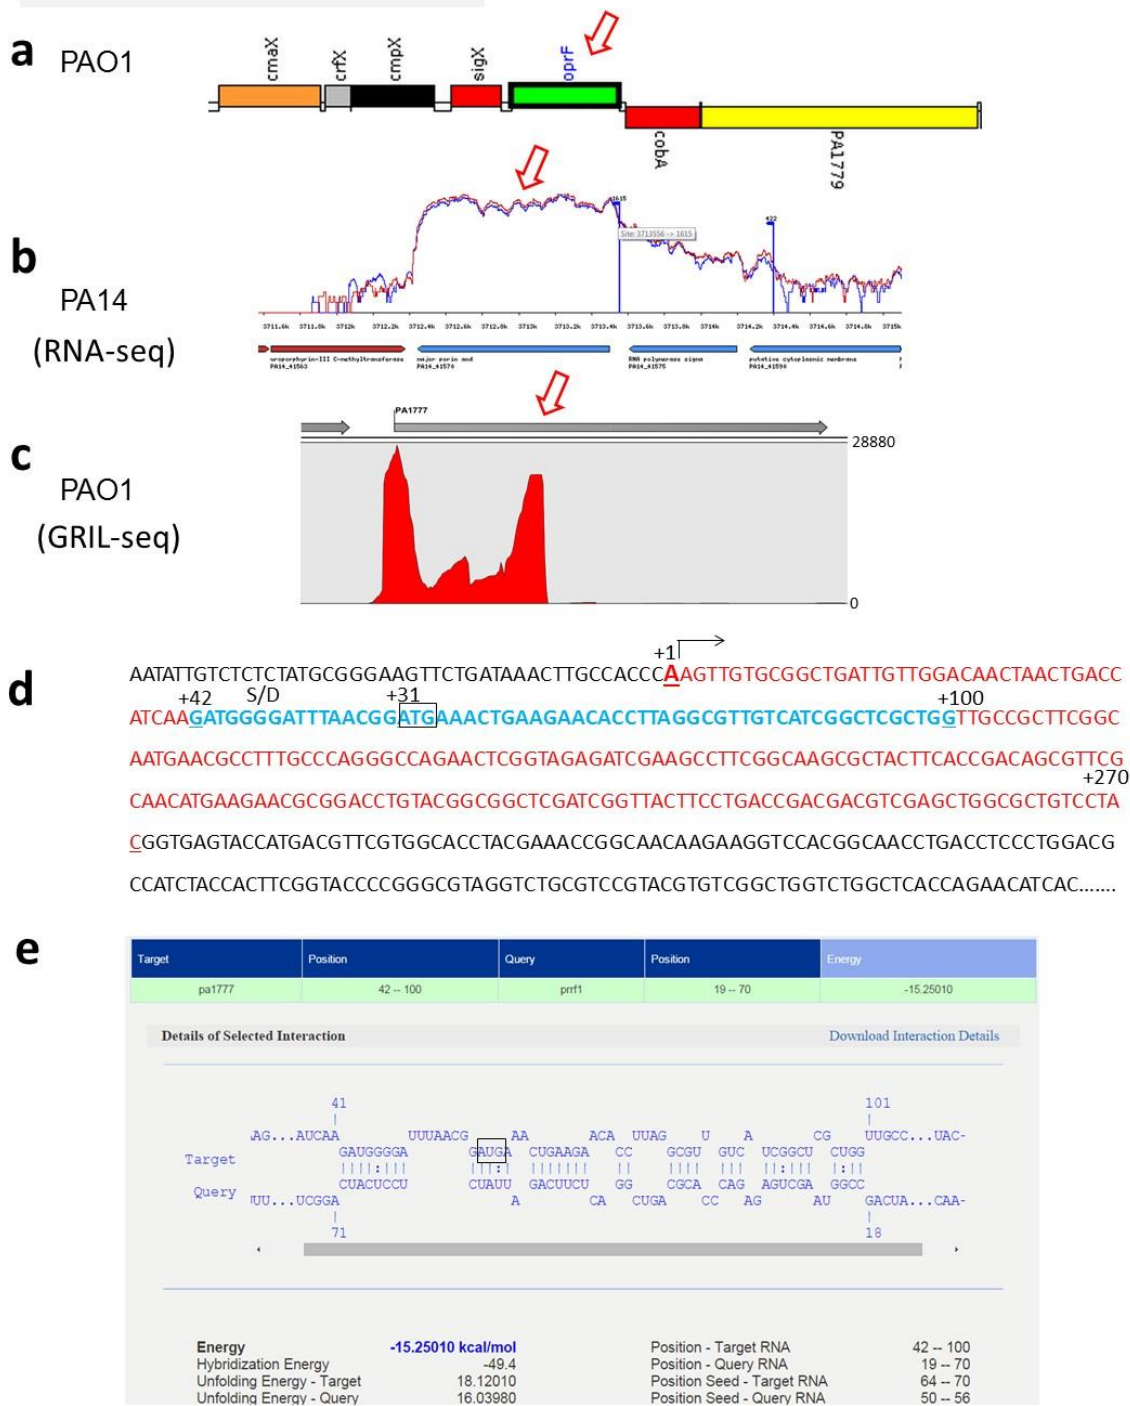

## Supplementary Figure 7 - #24

### #24 rpmJ, PA4242 : 50S ribosomal protein L36

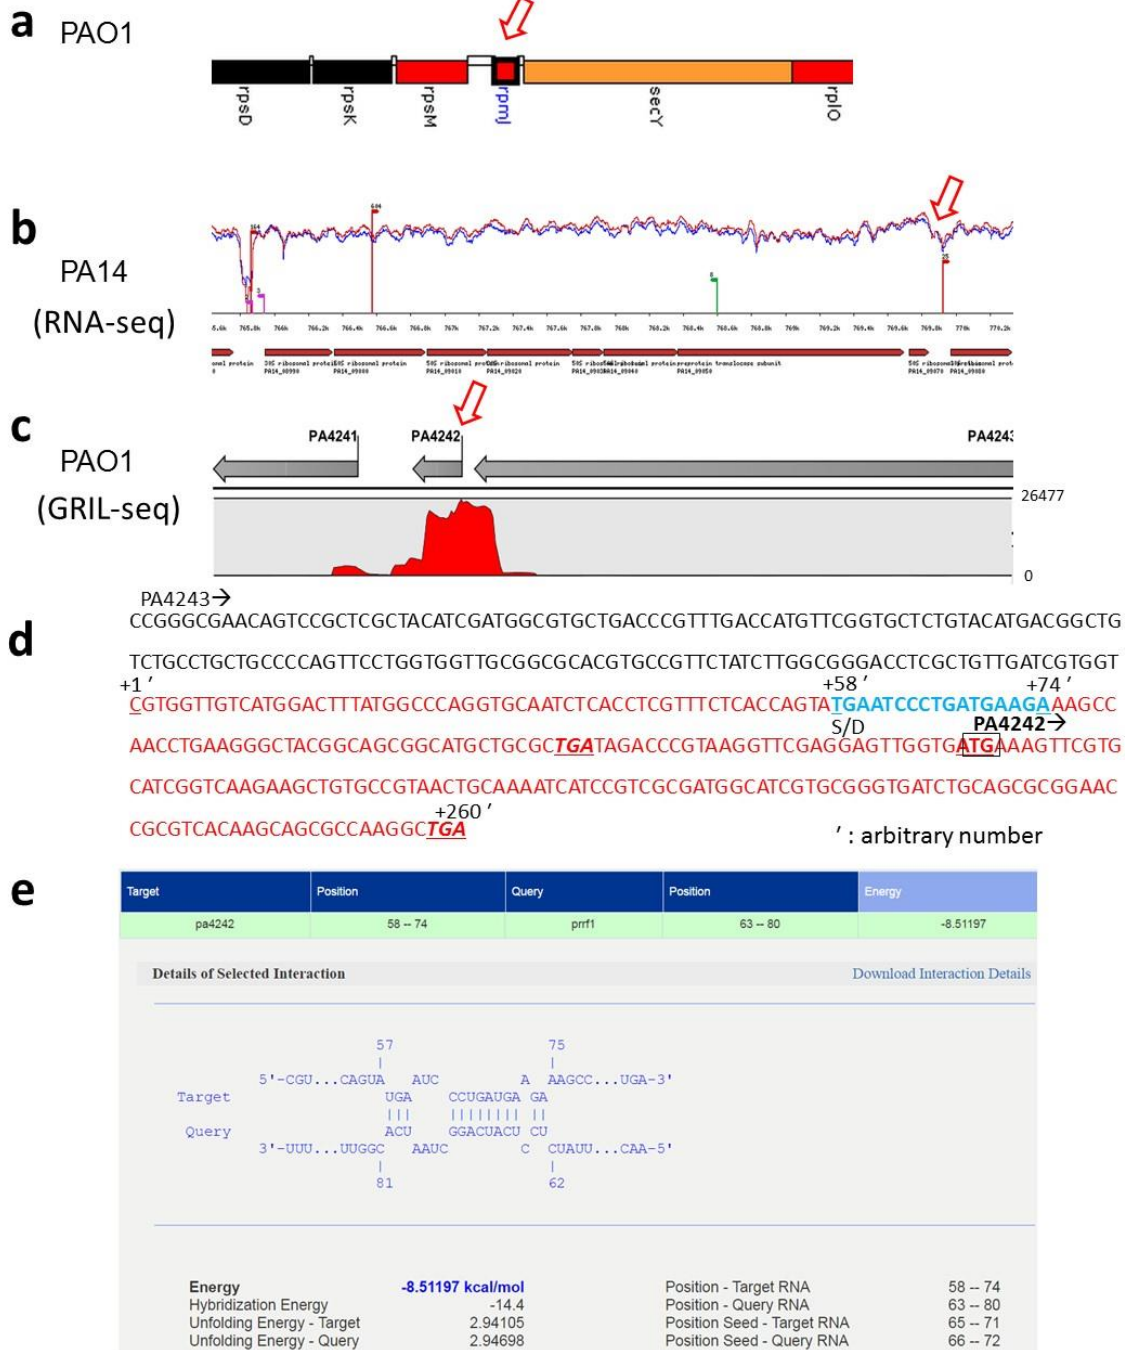



## Supplementary Figure 7 - #25

### #25 acnB, PA1787 : aconitate hydratase 2

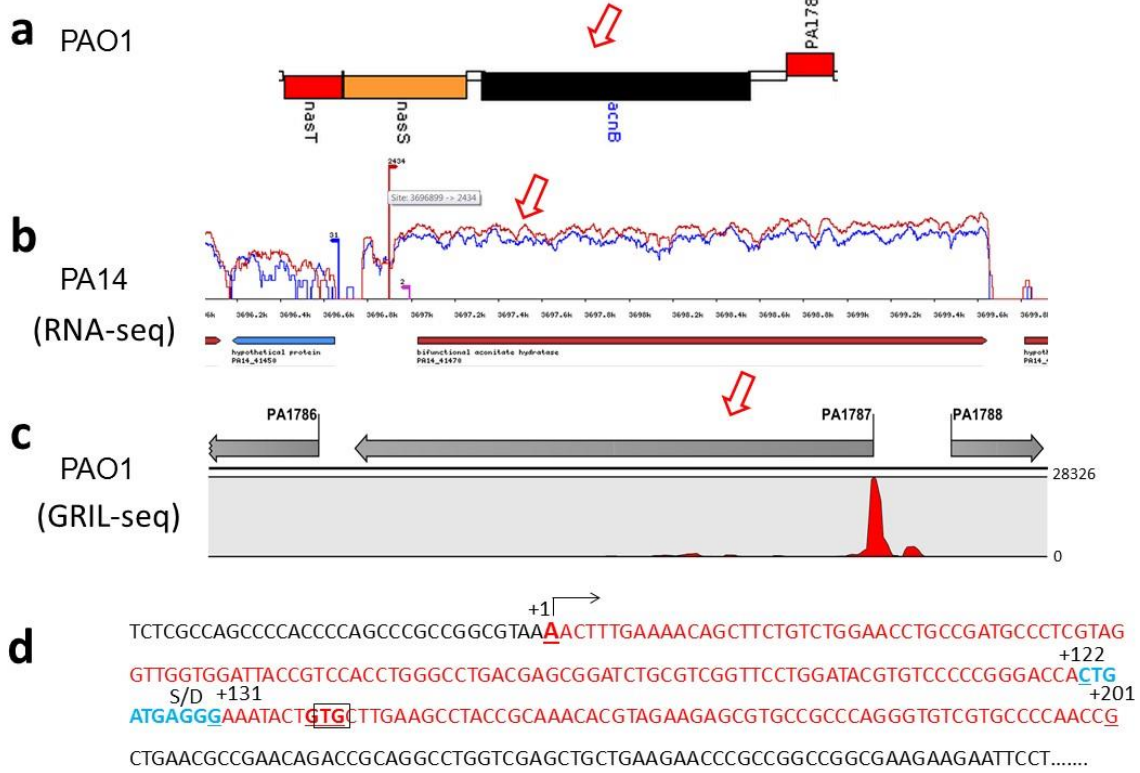

**e**

| Target | Position   | Query | Position | Energy    |
|--------|------------|-------|----------|-----------|
| pa1787 | 122 -- 131 | prf1  | 63 -- 72 | -11.64370 |

Details of Selected Interaction [Download Interaction Details](#)

```

      121      132
Target  5'-AAC...GACCA CUGAUGAGGG AAAUA...CCG-3'
          |||
Query   3'-UUU...AAUCG CUAUU...CAA-5'
          ||
          73      62
    
```

|                           |                           |                            |            |
|---------------------------|---------------------------|----------------------------|------------|
| <b>Energy</b>             | <b>-11.64370 kcal/mol</b> | Position - Target RNA      | 122 -- 131 |
| Hybridization Energy      | -17.1                     | Position - Query RNA       | 63 -- 72   |
| Unfolding Energy - Target | 2.64359                   | Position Seed - Target RNA | 125 -- 131 |
| Unfolding Energy - Query  | 2.81272                   | Position Seed - Query RNA  | 63 -- 69   |

## Supplementary Figure 7 - #26

### #26 ccoN1, PA1554 : Cytochrome c oxidase

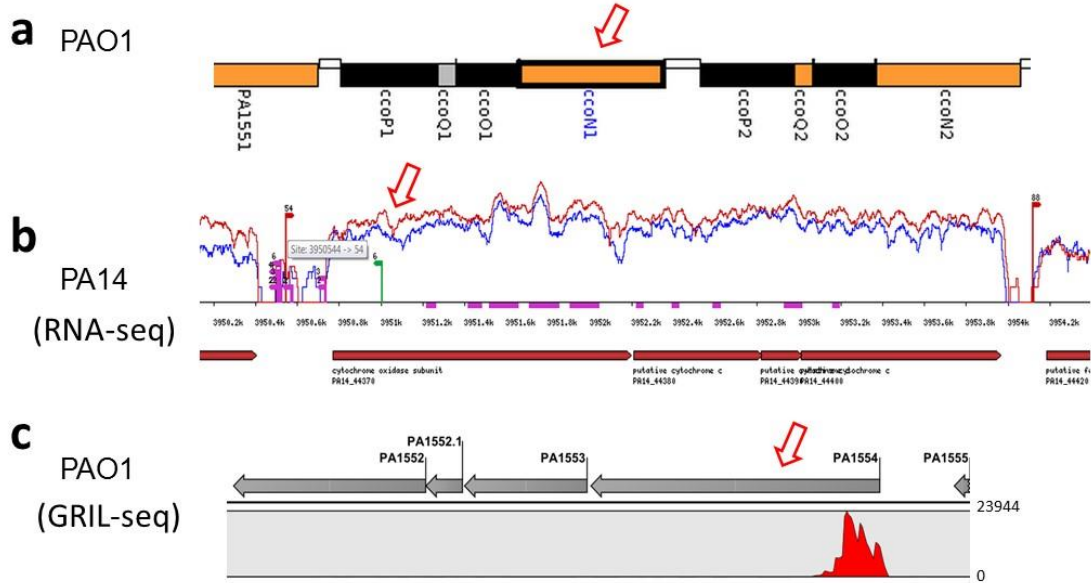

**d**

TCCTACCCTTCCTTTTCAATCGGCTCTAAGCTGCTCTGC<sup>+1</sup>ATTCTGTCCTCTCCGGCAGAGCGACGGGACACCTAACTTCA  
 CCGGCCGAACCACTCGCCGGATAGCGCCAGAAAGCCATACGGCCGCTTGAAAGCGCTCTGAAGCAGGCATCAA  
 ACTGGCGTCGCCCTTGGCGCTGGCGGTTGCAATGCCACCGCTTCTCCATACTTGGCCGCGATTTTTGTCCCTAAAA  
 AAGTCCATT<sup>+208</sup>AACCGTGAACCCCTAGATG<sup>S/D</sup>AGCACAGCAATCAGTCAGACTGC<sup>+250</sup>TTATAACTATAAGGTGGTCCGCCAGT  
 TCGCCGTTATGACGGTGGTCTGGGGGGTATTGGAATGGGTCTCGGTGCTCTGATCGCCGCCAACTGGTATGGCCCG  
<sup>+355</sup>AATTGAACTTCGACTGCGGTGACGAGCTTCGGCCGCTTCGCCCTGCACACCAACGCGGTGATCTTCGC.....

**e**

| Target | Position  | Query | Position | Energy    |
|--------|-----------|-------|----------|-----------|
| pa1554 | 208 – 250 | prf1  | 40 – 85  | -11.72480 |

Details of Selected Interaction [Download Interaction Details](#)

```

      207                               251
      |                               |
Target 5'-AUU...CAUU      AACCGUGG      AAAC  A      CACAGC      A      UUAUA...CGA-3'
      |   |   |   |   |   |   |   |   |   |   |   |   |   |   |   |   |   |   |   |
Query  3'-UUU...AGUUU      UUGGCACU      GGA  CUACUC      CUACUC      ACUUC  G      CACCC...CAA-5'
      |   |   |   |   |   |   |   |   |   |   |   |   |   |   |   |   |   |   |
      86                               39
  
```

|                           |                           |                            |            |
|---------------------------|---------------------------|----------------------------|------------|
| <b>Energy</b>             | <b>-11.72480 kcal/mol</b> | Position - Target RNA      | 208 -- 250 |
| Hybridization Energy      | -36.9                     | Position - Query RNA       | 40 -- 85   |
| Unfolding Energy - Target | 11.01640                  | Position Seed - Target RNA | 209 -- 215 |
| Unfolding Energy - Query  | 14.15880                  | Position Seed - Query RNA  | 78 -- 84   |

## Supplementary Figure 7 - #27

### #27 PA4880 : bacterioferritin

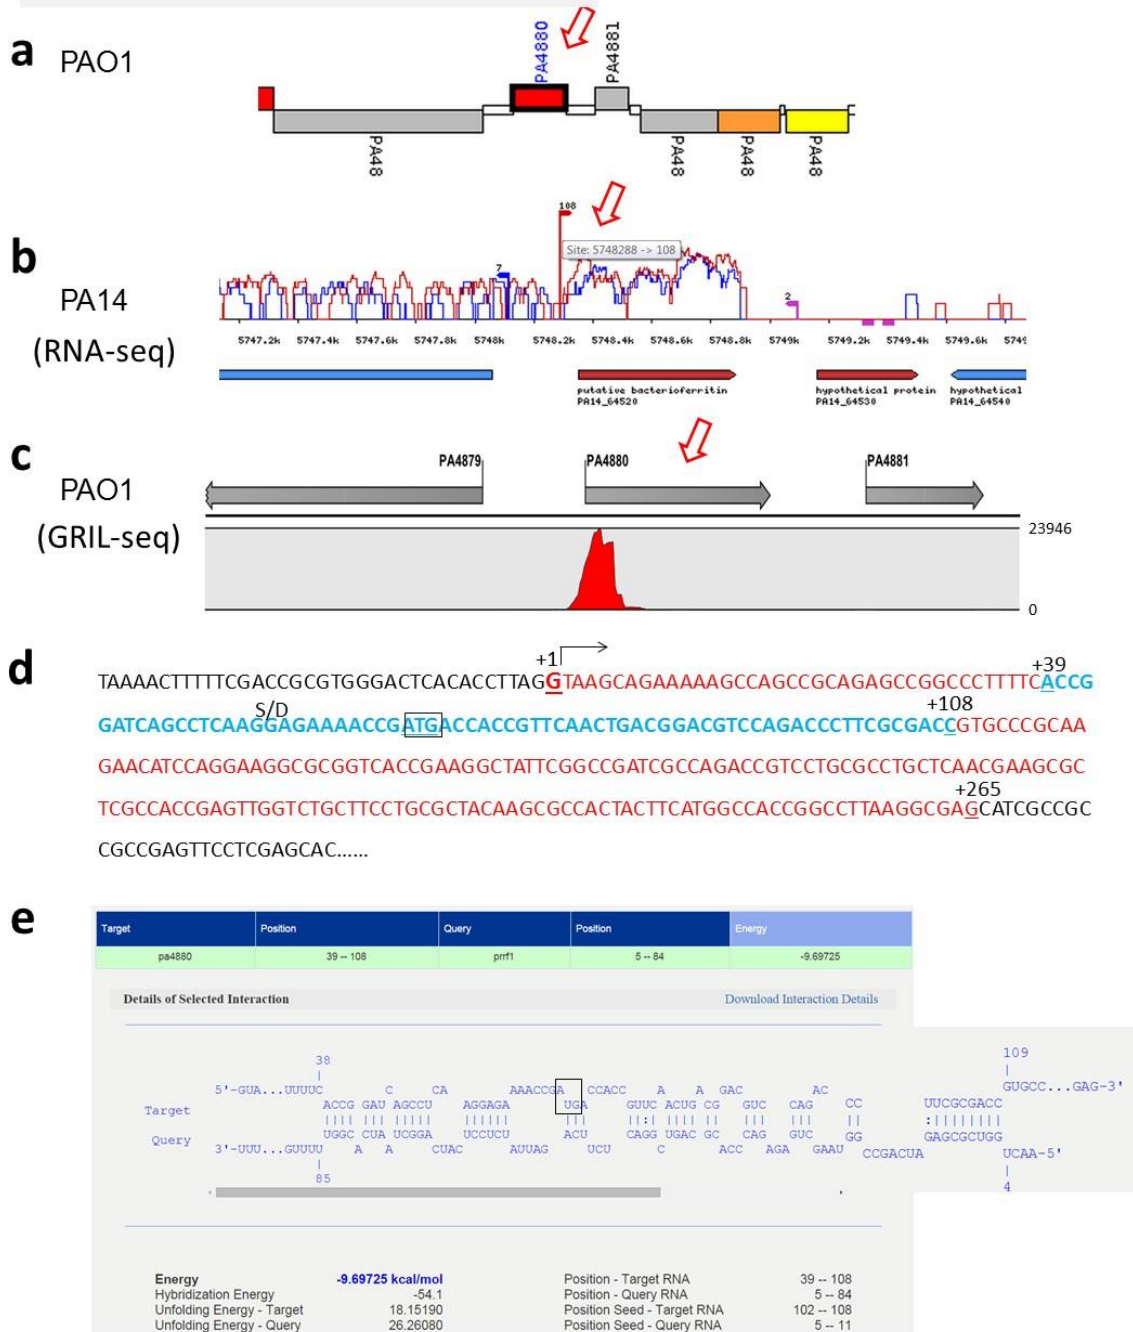

## Supplementary Figure 7 - #28

### #28 PA3169 : 5-methylthioribose-1-phosphate isomerase MtnA

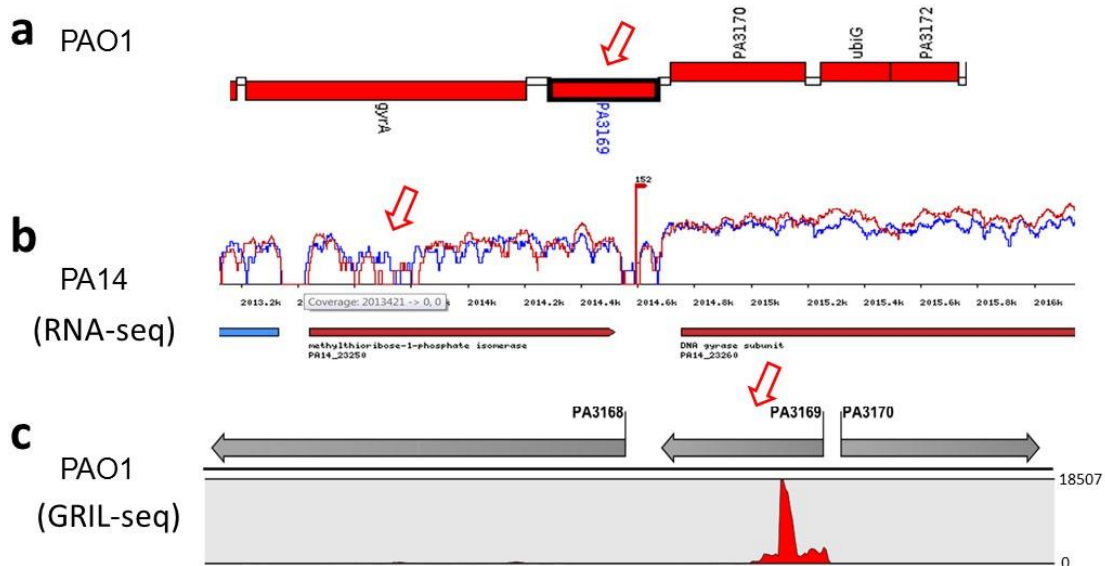

**d**

GGGCTCGTTATAATCCGCAGCTTTTCCGTG<sup>+1</sup>ATTCAGCGAGAGGTGTGTGATTCA GCGAGAGGTGTGTCATGCGAGAG S/D  
 CGACTGCTGGCGGCCGAGCGGGTCAAGGCGATCGAGTGGCGGGACGGTACGCTGCGGTTGCTGGATCAGCGCCTGC  
<sup>+133</sup> <sup>+140</sup>  
 TGCCCCAGGAGGAGGTCTGCTCGAACACGATCGCGGCCGAGGTGGCCAGGCCATTCCGCGATATGGCTGTGGC  
<sup>+201</sup>  
CGCGCGCCGGCCATCGGCATCAGCGCCGCCTACGGCATGCTCTGGCGCCCGCGCGCCTGGCGCAGGGCGGGC  
 ACTGGCGCGCCGCGCTGGAGGAGGACTTCCGCTGCTGGCCGACTCGCGACCCACGGCGGTCAACCTGTCT.....

**e**

| Target | Position   | Query | Position | Energy   |
|--------|------------|-------|----------|----------|
| pa3169 | 133 -- 140 | prf1  | 60 -- 67 | -5.99550 |

Details of Selected Interaction [Download Interaction Details](#)

```

          132       141
          |         |
Target  5'-AUU...CCAG GAGGAGGU CUGGC...CGC-3'
          |         |
          |         |
Query   3'-UUU...GACUA CUCCUCUA UUAGA...CAA-5'
          |         |
          68       59
  
```

|                           |                          |                            |            |
|---------------------------|--------------------------|----------------------------|------------|
| <b>Energy</b>             | <b>-5.99550 kcal/mol</b> | Position - Target RNA      | 133 -- 140 |
| Hybridization Energy      | -12.5                    | Position - Query RNA       | 60 -- 67   |
| Unfolding Energy - Target | 3.02997                  | Position Seed - Target RNA | 134 -- 140 |
| Unfolding Energy - Query  | 3.47453                  | Position Seed - Query RNA  | 60 -- 66   |

## Supplementary Figure 7 - #29

### #29 hcp1, PA0085 : T6SS component

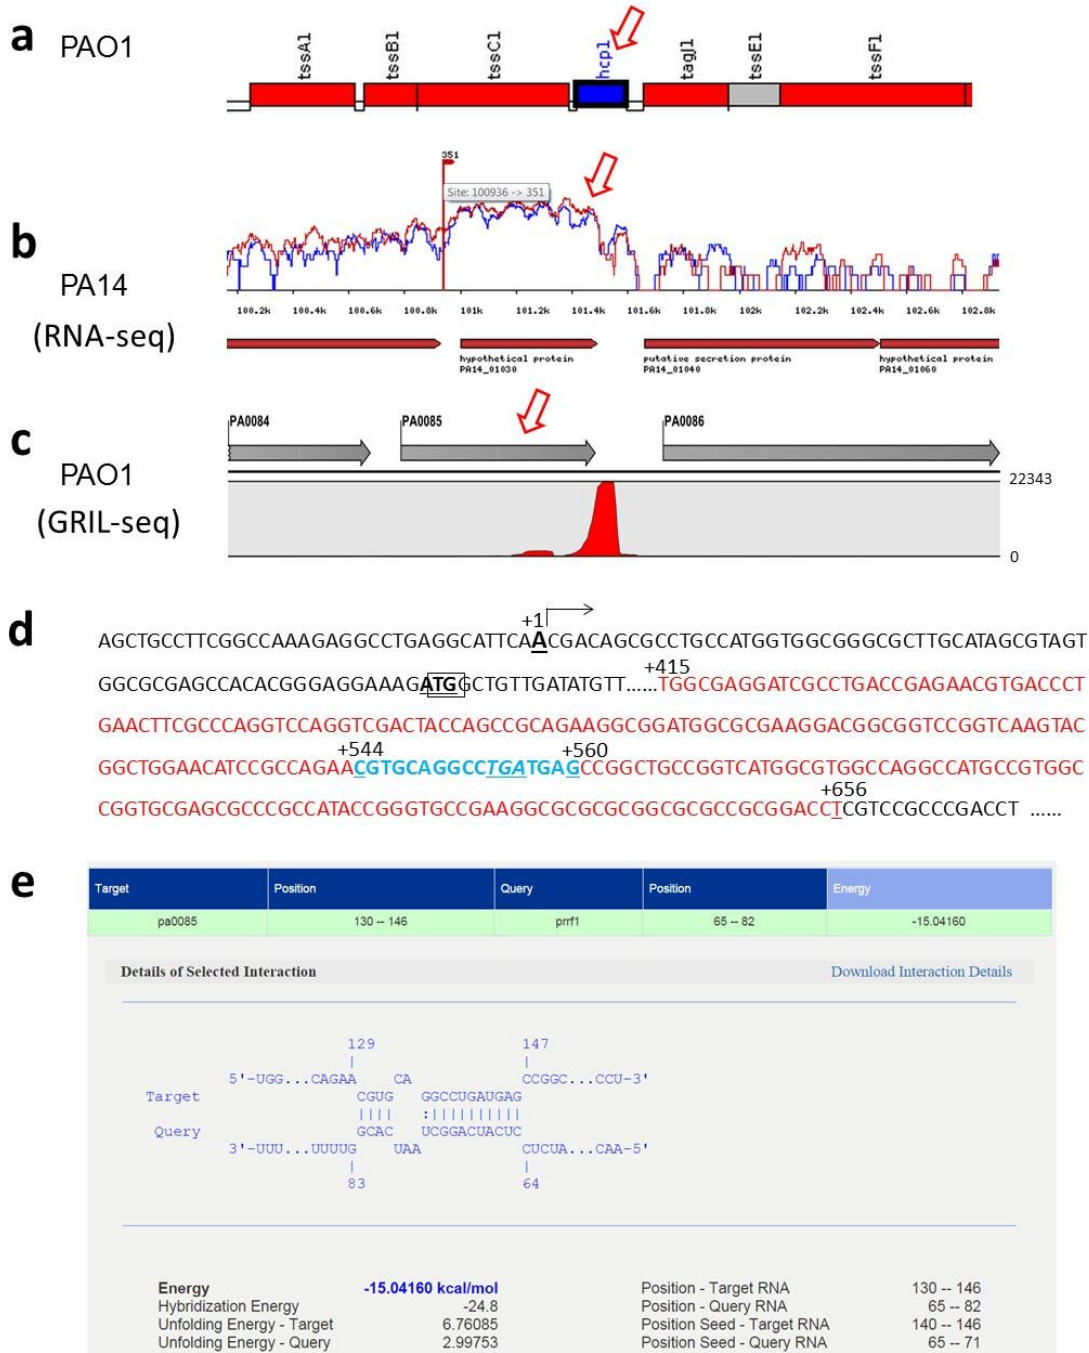

## Supplementary Figure 7 - #30

### #30 PA2953 : electron transfer flavoprotein-ubiquinone oxidoreductase

**a** PAO1

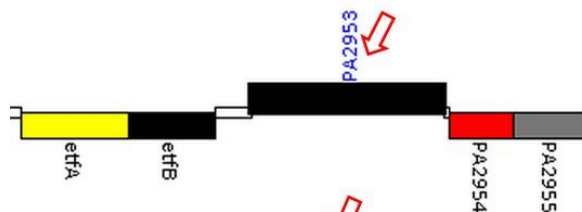

**b** PA14  
(RNA-seq)

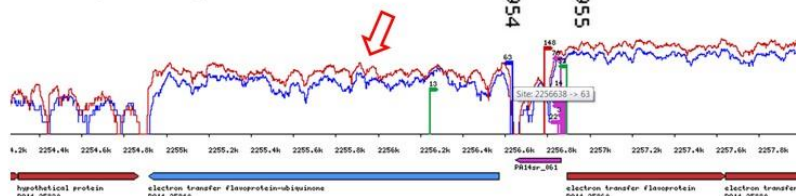

**c** PAO1  
(GRIL-seq)

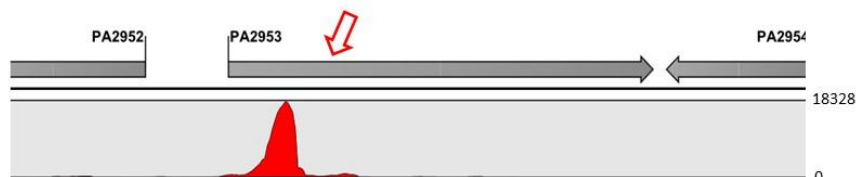

**d**

<sup>+1</sup> → <sup>+37</sup>  
 GGACCTGCCCATGCAGCTATATATAATGCGCCCGCTCTGATCAGGGAAAGATCTCAGCCACCAATAAACAGATACCGTG  
 S/D <sup>+63</sup>  
 AGCCTTGAGTAGGAGATCGATGTGGAAACGCGAATACATGGAATTCGACGTCGTCATCGTCGGCGCCGGCCCCGCCGG  
 TCTGTCCGCCGATGCCACTGAAGCAGAAGGCCGCCGAAGCCGGTCAAGAGATCAGCGTCTGCGTGGTGCAGAAG  
 GGTTCGAAAGTGGCGCCACATCCTCTCCGCGCGGTGTTCCGAGCCGCGCGCTGAACGAGCTGTCCCCGACTG  
<sup>+278</sup>  
 GAAGGAACTCGGCG.....

**e**

| Target | Position | Query | Position | Energy    |
|--------|----------|-------|----------|-----------|
| pa2953 | 37 – 63  | prf1  | 60 – 88  | -14.95380 |

Details of Selected Interaction [Download Interaction Details](#)

```

      36                               64
      |                               |
Target 5'-GCU...UAAAC U              U GU   CGAUG...GGA-3'
          AGA ACCGUGA   GCCU GA   AGGAGAU
          |: |||||
Query  3'-UUU...CCCAG U   AAU   AC   UUAGA...CAA-5'
          UUU UGGCACU   CGGA CU   UCCUCUA
      89                               59
  
```

|                           |                           |                            |         |
|---------------------------|---------------------------|----------------------------|---------|
| <b>Energy</b>             | <b>-14.95380 kcal/mol</b> | Position - Target RNA      | 37 – 63 |
| Hybridization Energy      | -27.4                     | Position - Query RNA       | 60 – 88 |
| Unfolding Energy - Target | 5.32882                   | Position Seed - Target RNA | 57 – 63 |
| Unfolding Energy - Query  | 7.11738                   | Position Seed - Query RNA  | 60 – 66 |

### Supplementary Figure 7 - #31

### #31 rsmA, PA0905 : RNA-binding global regulator

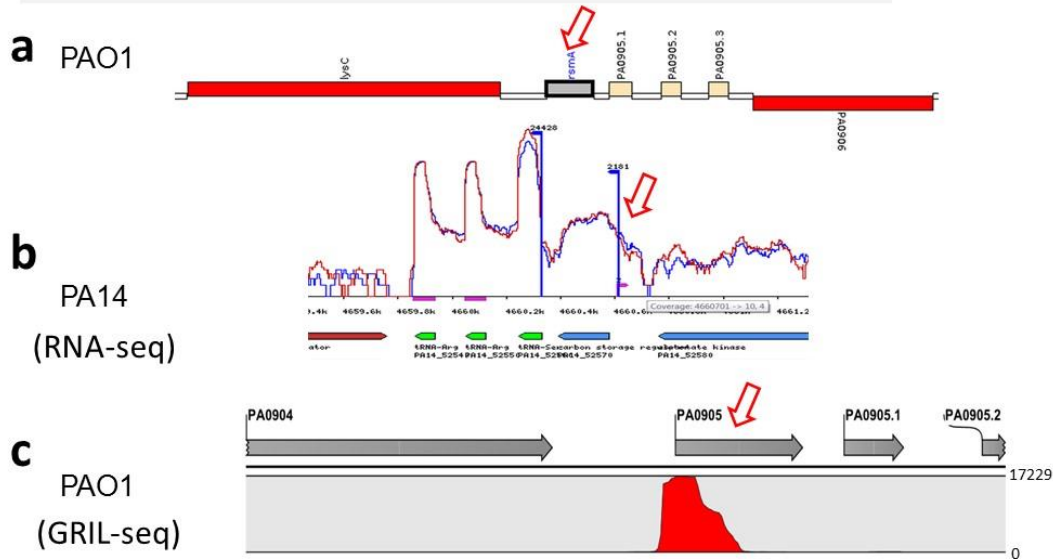

**d**

```

TTCATTCCGGCGGGACTGGTCAATACTG+1G→TGAAGGATCGCGCTCTTGATTTCTGCGGATCCGCCATTCTTTTTTG
CAGACTGTTGTCTGAAATATTCGC+78GTGAGGAGAAAGGAS/DATGCTGATTCTGACT+106CTCGGGTCTGGAGAGACCCTGAT
GGTAGGTGACGACGTACCCGTGACGGTACTGGGTGTCAAAGGGAACCAGGTGCGCATCGCGCTCAACGCGCCGAAG
+206GAAAGTCCCGTACACCGGGAGAAATTACCAGCGCATCCAGAAAGAGAAAGATCAAGAGCCAAACCATTAATTTTTTA
TCTAATTTCCCTTTGCAAACGGGGTAAAGATGGGTATCATGCGCCCGTGTTCGGGAGAGGTGCCGAGTGCCGAA
    
```

**e**

| Target | Position  | Query | Position | Energy   |
|--------|-----------|-------|----------|----------|
| pa0905 | 78 -- 106 | prf1  | 42 -- 69 | -7.39943 |

Details of Selected Interaction [Download Interaction Details](#)

```

              77              107
Target 5'-GSU...UUCGC      A GA CU U      CSUCG...AGG-3'
          |                |
          GUGAGGAGA AG  UG  GA UCUGACU
          : : : : : : : : : : : : : : : : : : : : : : : : : : :
Query  3'-UUU...CGGAC      A AG UU C      CGCAC...CAA-5'
          |                |
          70              41
    
```

|                           |                          |                            |            |
|---------------------------|--------------------------|----------------------------|------------|
| <b>Energy</b>             | <b>-7.39943 kcal/mol</b> | Position - Target RNA      | 78 -- 106  |
| Hybridization Energy      | -25.9                    | Position - Query RNA       | 42 -- 69   |
| Unfolding Energy - Target | 7.75759                  | Position Seed - Target RNA | 100 -- 106 |
| Unfolding Energy - Query  | 10.74300                 | Position Seed - Query RNA  | 42 -- 48   |

## Supplementary Figure 7 - #32

### #32 dgkA, PA3603 : diacylglycerol kinase

**a** PAO1

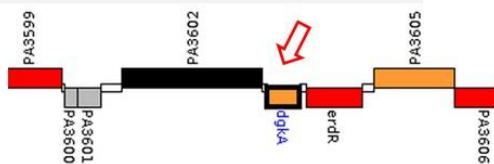

**b** PA14  
(RNA-seq)

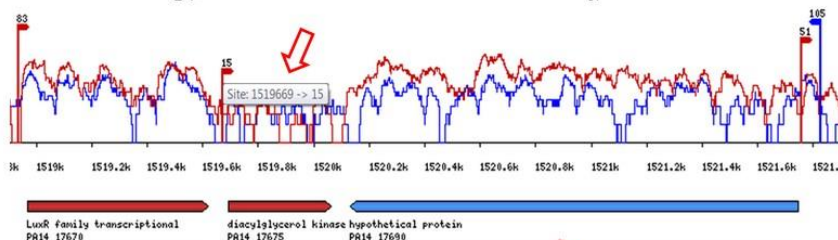

**c** PAO1  
(GRIL-seq)

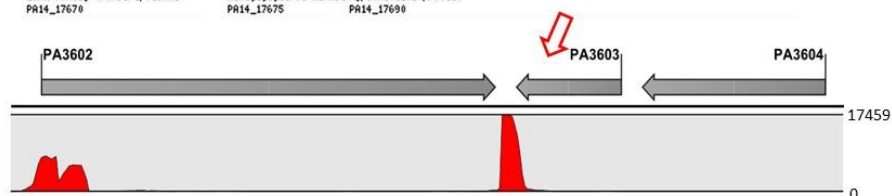

**d**

GACCAGCCGGCGCTAGACTGCCGGCC<sup>+1</sup>TTCCGAATCGATGAGAACCCGACGTGTCGCCTTC.....GCGTCTCGCTGGA  
 ACGCCACCCTCTGTGAAGAATGCCAAGGACATGGGCAGCGCCGCGCAGTTCGTGGCCCTCACCGTGATCACCGTGAC  
 +391 +408 +446  
 CTGGGGACCATCCTGCTGGCTGATCTACCGGACA TGA AAAAGCCGGAGGCAGCGATGCTCCGGCTTTTCTG  
 CGTGCGA.....

**e**

| Target | Position | Query | Position | Energy   |
|--------|----------|-------|----------|----------|
| pa3604 | 98 – 115 | prf1  | 4 – 20   | -7.19701 |

Details of Selected Interaction [Download Interaction Details](#)

```

          97           116
          |           |
Target  5'-ACG...UGCUG      A  GA  UGAAA...CUU-3'
          |           |
          GGCUGAUCU  CGCG  CA
          |||||      ||||  ||
Query   3'-UUU...AAUGG      UG  CAA-5'
          |           |
          21           3
  
```

|                           |                          |                            |           |
|---------------------------|--------------------------|----------------------------|-----------|
| Energy                    | <b>-7.19701 kcal/mol</b> | Position - Target RNA      | 98 – 115  |
| Hybridization Energy      | -27.1                    | Position - Query RNA       | 4 – 20    |
| Unfolding Energy - Target | 8.16544                  | Position Seed - Target RNA | 100 – 106 |
| Unfolding Energy - Query  | 11.73760                 | Position Seed - Query RNA  | 12 – 18   |



## Supplementary Figure 7 - #33

### #33 htpX, PA2830 : heat shock protein HtpX

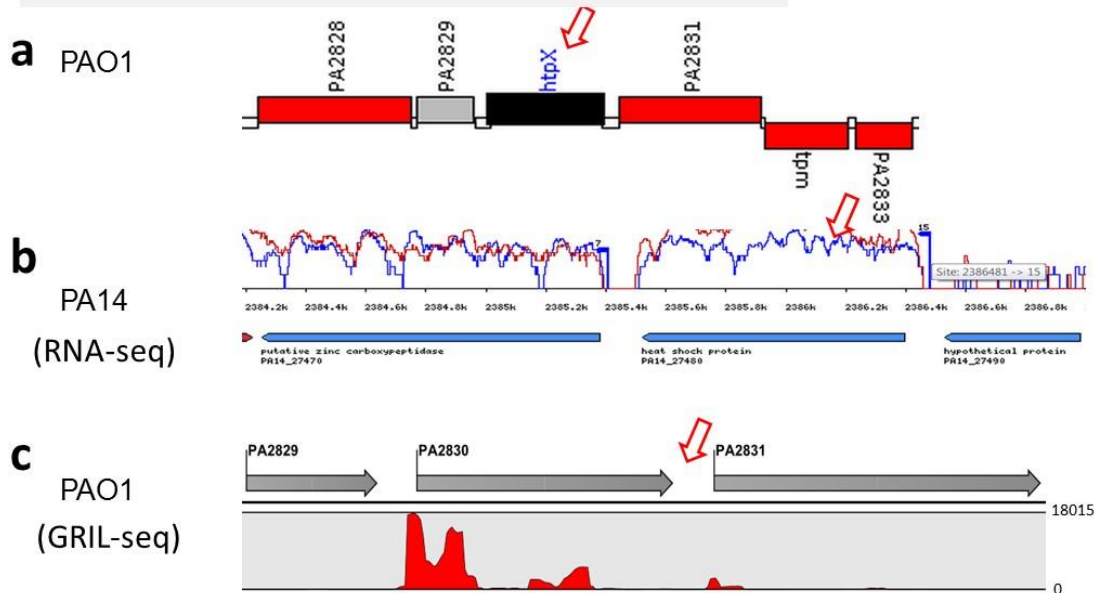

**d**

```

TCGCCATGGACCGCCCTTATATAACCCGC+1ATGATTATCAGGAGCCGTTGCGCCGCCCGGGCCTGCGAACCGCG
+51CTCCGTGCCTTCAGCCGTGAGGAGAGS/D+73AGCTTTACACC+127ATGCGCATCCTGTTGTTCTCGCCACCAACTGGCAGTCC
+129TGGTGATTGCCAGCATCACCTGAAACTGCTCGGGGTGGACCGCTTACCAGCCAGAATTACGGCAGCCTGTGGTCT
+234TCTGCGCCGTGTTGCGTTTCGCCGGTTC+244GCTGCTCGCTGTTTCATCTCCAAGTGATGGCGAAGATGAGCACCGGTAC
CGAAGTCATCAGCCAGCCGCGCACCCGTACGAACAGTGGCTGCTGCAAACCGTGAAGAGCTGCCGCGAAGCCG+361
GCATCAAGATGCCGAGGTGCGCATCTCCCCGCTACGAGGCCAACGCCTTCCACCAGGCTGGAACAAGAACGAC
GCGCTGGTCGCGGTGAGCCAGGCCTGCTCGAACGTTTCTGCCCC.....
    
```

**e**

| * Input = +1 to +127                                                                                                                                                                                                                                       |                   |       |                            |          | * Input = +129 to +361                                                                                                                                                                                                             |                   |       |                            |           |
|------------------------------------------------------------------------------------------------------------------------------------------------------------------------------------------------------------------------------------------------------------|-------------------|-------|----------------------------|----------|------------------------------------------------------------------------------------------------------------------------------------------------------------------------------------------------------------------------------------|-------------------|-------|----------------------------|-----------|
| Target                                                                                                                                                                                                                                                     | Position          | Query | Position                   | Energy   | Target                                                                                                                                                                                                                             | Position          | Query | Position                   | Energy    |
| pa2830                                                                                                                                                                                                                                                     | 51-73             | prt1  | 61-83                      | -8.28468 | pa2830                                                                                                                                                                                                                             | 106-116           | prt1  | 9-19                       | -8.96851  |
| <p>Details of Selected Interaction</p> <pre>           50           74 Target  5'-AUG...GCGCU   CCGUC   AGCUU...UCC-3'                             Query   3'-UUU...UUUUU   UAA   AC   AUUAG...GAA-5'           84           60                     </pre> |                   |       |                            |          | <p>Details of Selected Interaction</p> <pre>           105       117 Target  5'-GGU...GGUUC   UGUUC...CCG-3'                             Query   3'-UUU...AUGGC   CUGGUCGAA-5'           20           8                     </pre> |                   |       |                            |           |
| Energy                                                                                                                                                                                                                                                     | -8.28468 kcal/mol |       | Position - Target RNA      | 51 - 73  | Energy                                                                                                                                                                                                                             | -8.96851 kcal/mol |       | Position - Target RNA      | 106 - 116 |
| Hybridization Energy                                                                                                                                                                                                                                       | -26.6             |       | Position - Query RNA       | 61 - 83  | Hybridization Energy                                                                                                                                                                                                               | -21.4             |       | Position - Query RNA       | 9 - 19    |
| Unfolding Energy - Target                                                                                                                                                                                                                                  | 11.71750          |       | Position Seed - Target RNA | 67 - 73  | Unfolding Energy - Target                                                                                                                                                                                                          | 4.41173           |       | Position Seed - Target RNA | 110 - 116 |
| Unfolding Energy - Query                                                                                                                                                                                                                                   | 6.59782           |       | Position Seed - Query RNA  | 61 - 67  | Unfolding Energy - Query                                                                                                                                                                                                           | 8.01976           |       | Position Seed - Query RNA  | 9 - 15    |

## Supplementary Figure 7 - #34

### #34 cc4, PA4812 : formate dehydrogenase-O, major subunit

**a** PAO1

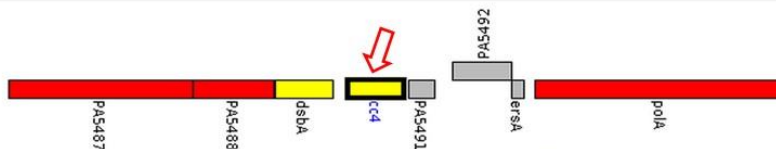

**b** PA14  
(RNA-seq)

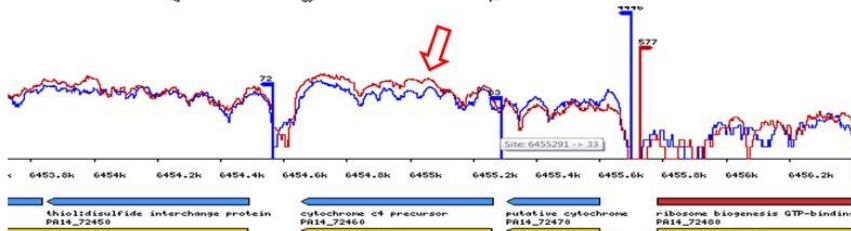

**c** PAO1  
(GRIL-seq)

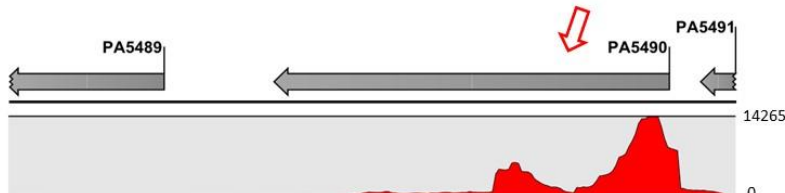

**d**

GATGGTGAAGAAGTAGCCGAAGCCCACTAT<sup>+1</sup>TTCACCC<sup>+11</sup>TAGCCGTAATTGGATTAGCTCATGAACAAACTTCTCGTGAGTC  
 TGCTGTTGACCC<sup>+71</sup>TGGGTCTGACCGGCC<sup>+125</sup>TTGCCATGCCGCTGGCGATGCCGCCGCGGGCCAGGCCGAAAGCCGCGGTATGCGG  
 CGCCTGTACGGTGC GGATGGCAACAGCCCGCGCCGAAC<sup>+125</sup>TCCGAAACTGGCCGCCAGGGCGAGCGTTACCTGCTCAA  
 GCAGATGCATGACATCAAGGACGGCAAGCGTACC GTGCTGAAATGACCGGCTGCTGACCAA...

**e**

| Target | Position | Query | Position | Energy    |
|--------|----------|-------|----------|-----------|
| cc4    | 11 - 71  | PrrF1 | 32 - 85  | -17.79930 |

Details of Selected Interaction [Download Interaction Details](#)

```

      10                               72
      |                               |
      UUU...COCUU      AAUUG      ACAAACU      OGU      UGACCC      GACCG...
Target  AGCCGU      GAUAGC      UGUCA      UCU      GAGUCUG      CUGU      UGGGUCU
      |::|::|      |::|::|      |::|      |::|::|::|      |::|      |::|::|
Query  UUGGCA      CUAUUG      ACUACU      AGA      CUCAGGC      GACG      ACCCAGA
      |                               |
      UUU...AGUU      G      CCUCUAUU      CUU      U      C      GAGUC...
      |                               |
      86                               31
    
```

|                           |                           |                            |         |
|---------------------------|---------------------------|----------------------------|---------|
| <b>Energy</b>             | <b>-17.79930 kcal/mol</b> | Position - Target RNA      | 11 - 71 |
| Hybridization Energy      | -48.6                     | Position - Query RNA       | 32 - 85 |
| Unfolding Energy - Target | 15.79530                  | Position Seed - Target RNA | 65 - 71 |
| Unfolding Energy - Query  | 14.96540                  | Position Seed - Query RNA  | 32 - 38 |

## Supplementary Figure 7 - #35

### #35 *sodB*, PA4366 : superoxide dismutase

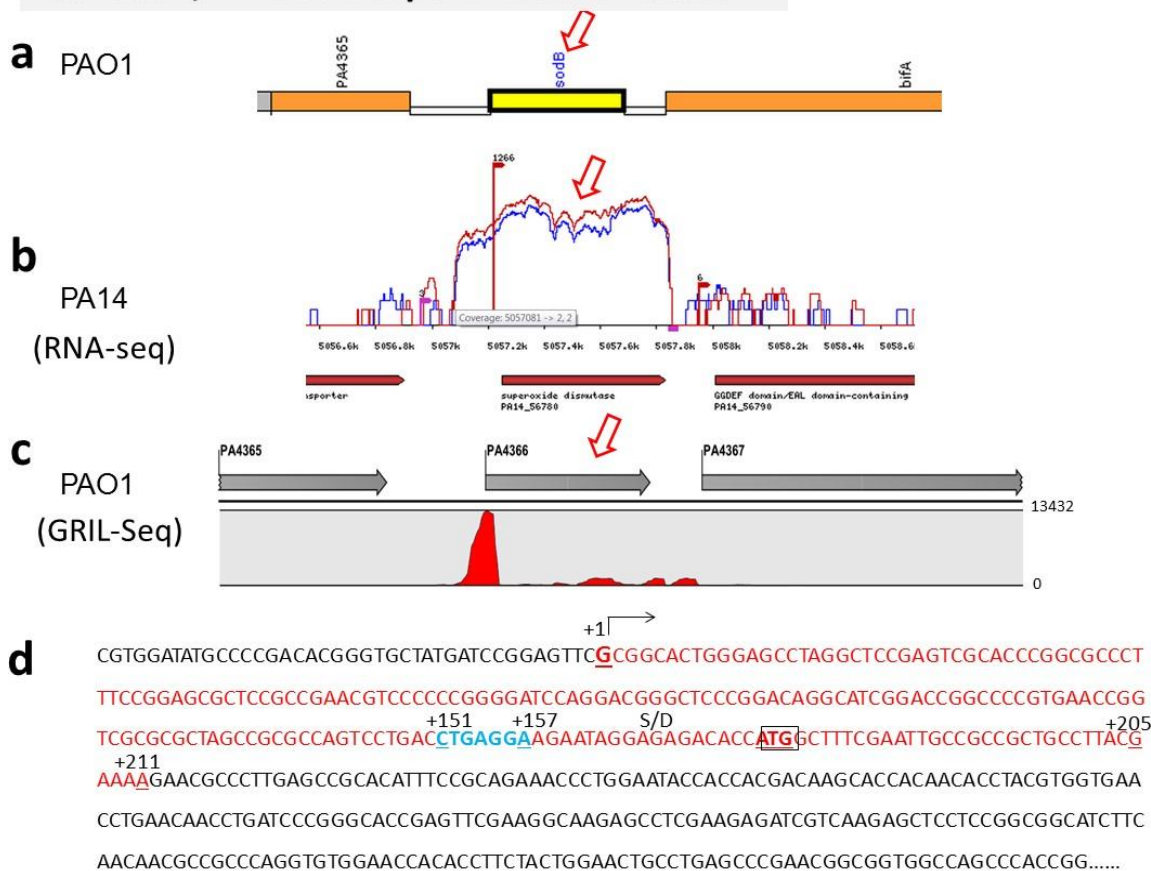

**e**

| Target      | Position  | Query       | Position | Energy   |
|-------------|-----------|-------------|----------|----------|
| <i>sodB</i> | 133 – 157 | <i>prf1</i> | 63 – 85  | -9.22290 |

Details of Selected Interaction [Download Interaction Details](#)

```

          132                               158
          |                               |
Target  5'-GCG...GCGCU   C CC   U   CC   AGAAU...AAA-3'
          |             |   |   |   |   |   |
          AGCCG G   AG CCUGA   UGAGGA
          |:|:|:|   |   |   |   |   |
Query   3'-UUU...AGUUU   A UAA   CUAUU...CAA-5'
          |             |   |   |   |   |
          86                               62
    
```

|                           |                          |                            |           |
|---------------------------|--------------------------|----------------------------|-----------|
| Energy                    | <b>-9.22290 kcal/mol</b> | Position - Target RNA      | 133 – 157 |
| Hybridization Energy      | -22.1                    | Position - Query RNA       | 63 – 85   |
| Unfolding Energy - Target | 9.87189                  | Position Seed - Target RNA | 152 – 157 |
| Unfolding Energy - Query  | 3.00521                  | Position Seed - Query RNA  | 63 – 68   |

### Supplementary Figure 7 - #36

#### #36 leuC, PA3121 : 3-isopropylmalate dehydratase large subunit

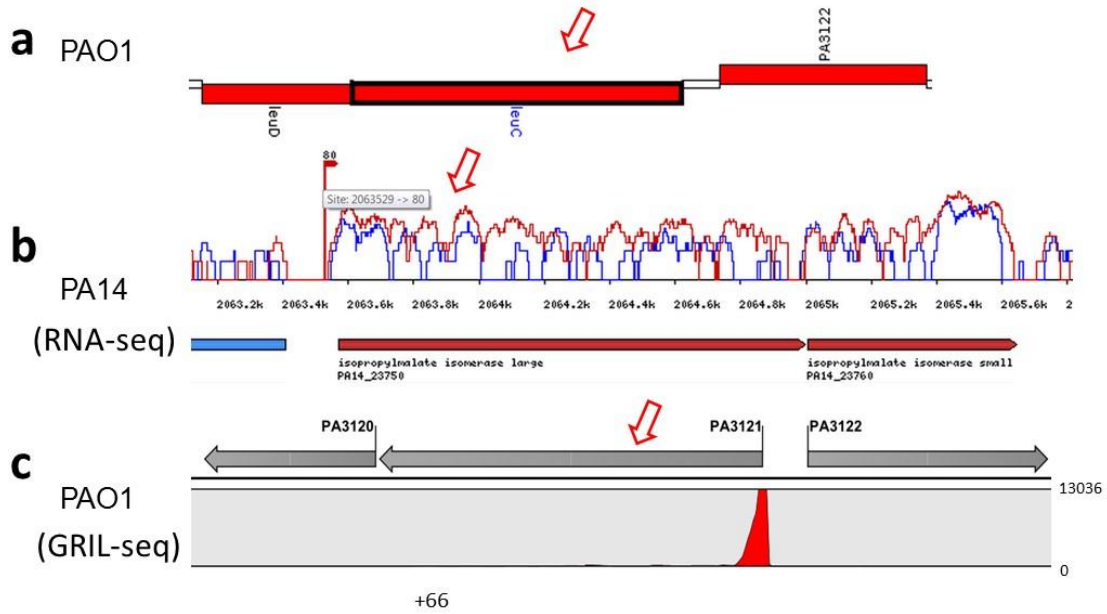

**d**

GAATTTGAGTTATTCGTAGACAAGCCATAGGATCATCCTC<sup>+1</sup>CAAGCCCTGTGGGCATA<sup>+19</sup>GAAATGAGCTGATGAGGAA S/D+36  
 TCCCGATG<sup>5</sup>CCGGCAAGACCCTCTACGACAAACTCTGGGACATGCACCTGGTCAAGCAGCGCGACGACGTTCCGGC  
 CTGATCTACATCGACCGCATATCCTGCACGAAGTGACCTCGCCGCAAGCCTTCGAGGGTCTTCGCTGCGCGGGCGCA  
<sup>+195</sup>  
 AGCCGTGGCGGATCGACGCCAACATCGCCACCCGGACCACAACGTGCCACCACCCGCACCGAGCG.....

**e**

| Target | Position | Query | Position | Energy    |
|--------|----------|-------|----------|-----------|
| pa3221 | 19 - 36  | prf1  | 63 - 79  | -11.65330 |

Details of Selected Interaction [Download Interaction Details](#)

```

      18           37
      |           |
Target 5'-ACA...GCAUA AAUG AAUCC...CAA-3'
      GA   AGC UGAUGAGGA
      ||   ||| |||||
Query  3'-UUU...UGGCA AA   G   CUAUU...CAA-5'
      |           |
      80           62
  
```

|                           |                           |                            |         |
|---------------------------|---------------------------|----------------------------|---------|
| <b>Energy</b>             | <b>-11.65330 kcal/mol</b> | Position - Target RNA      | 19 - 36 |
| Hybridization Energy      | -18.9                     | Position - Query RNA       | 63 - 79 |
| Unfolding Energy - Target | 4.32249                   | Position Seed - Target RNA | 30 - 36 |
| Unfolding Energy - Query  | 2.92424                   | Position Seed - Query RNA  | 63 - 69 |

### Supplementary Figure 7 - #37

#### #37 fdnG, PA4812 : formate dehydrogenase-O, major subunit

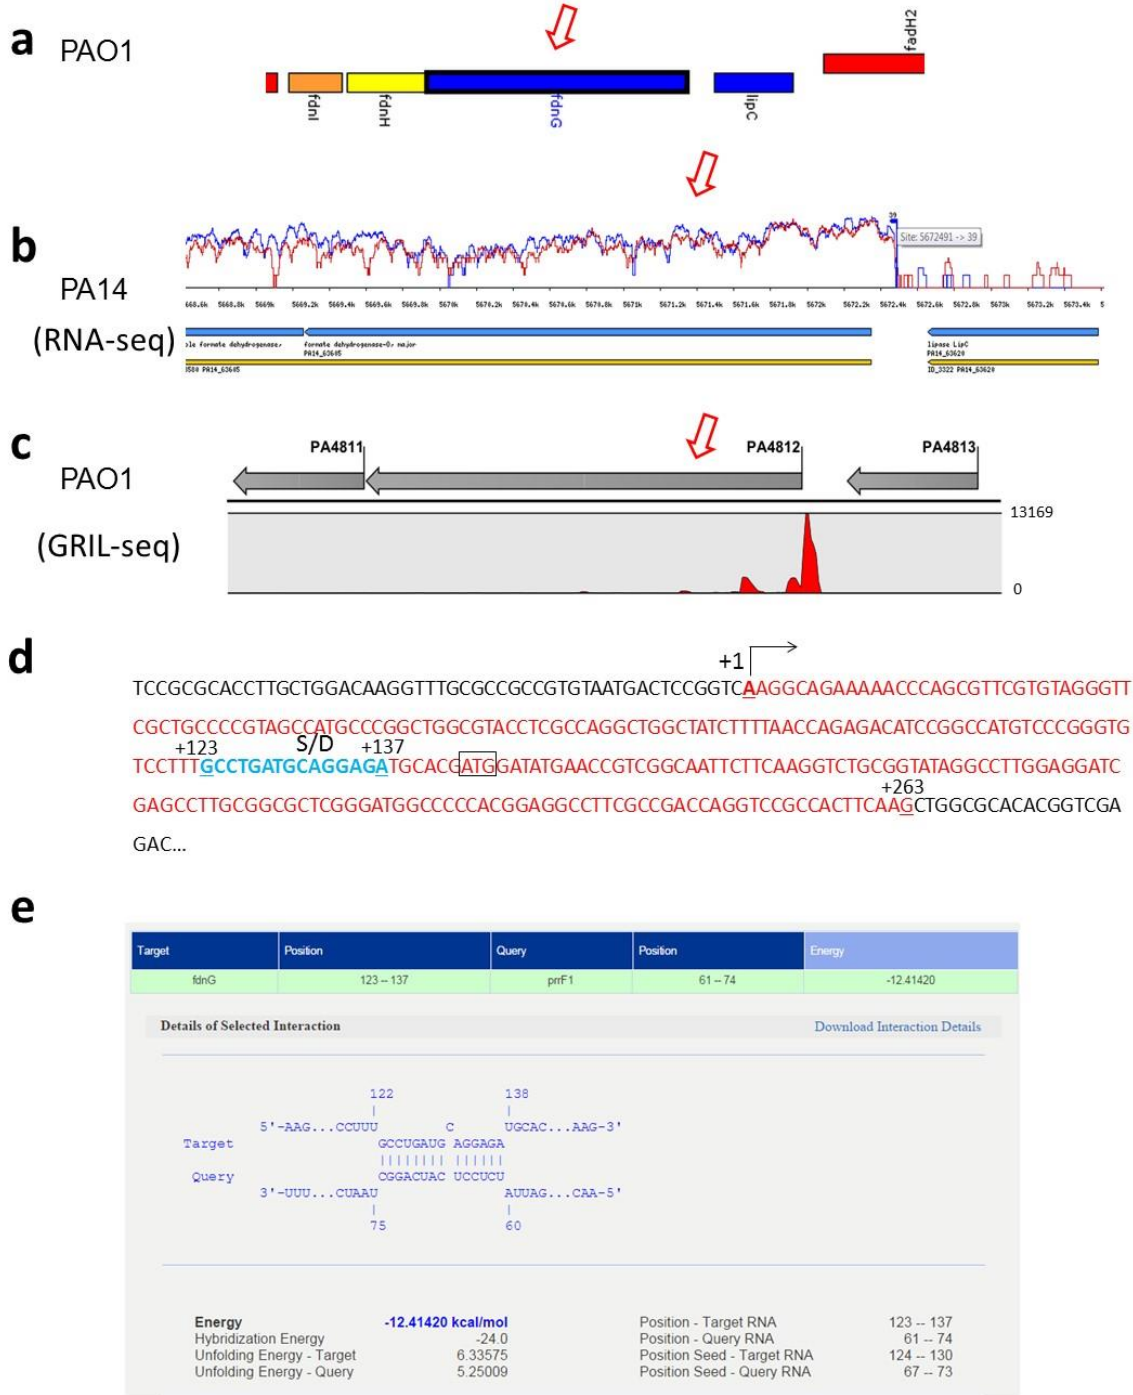

## Supplementary Figure 7 - #38

### #38 dadX, PA5302 : catabolic alanine racemase

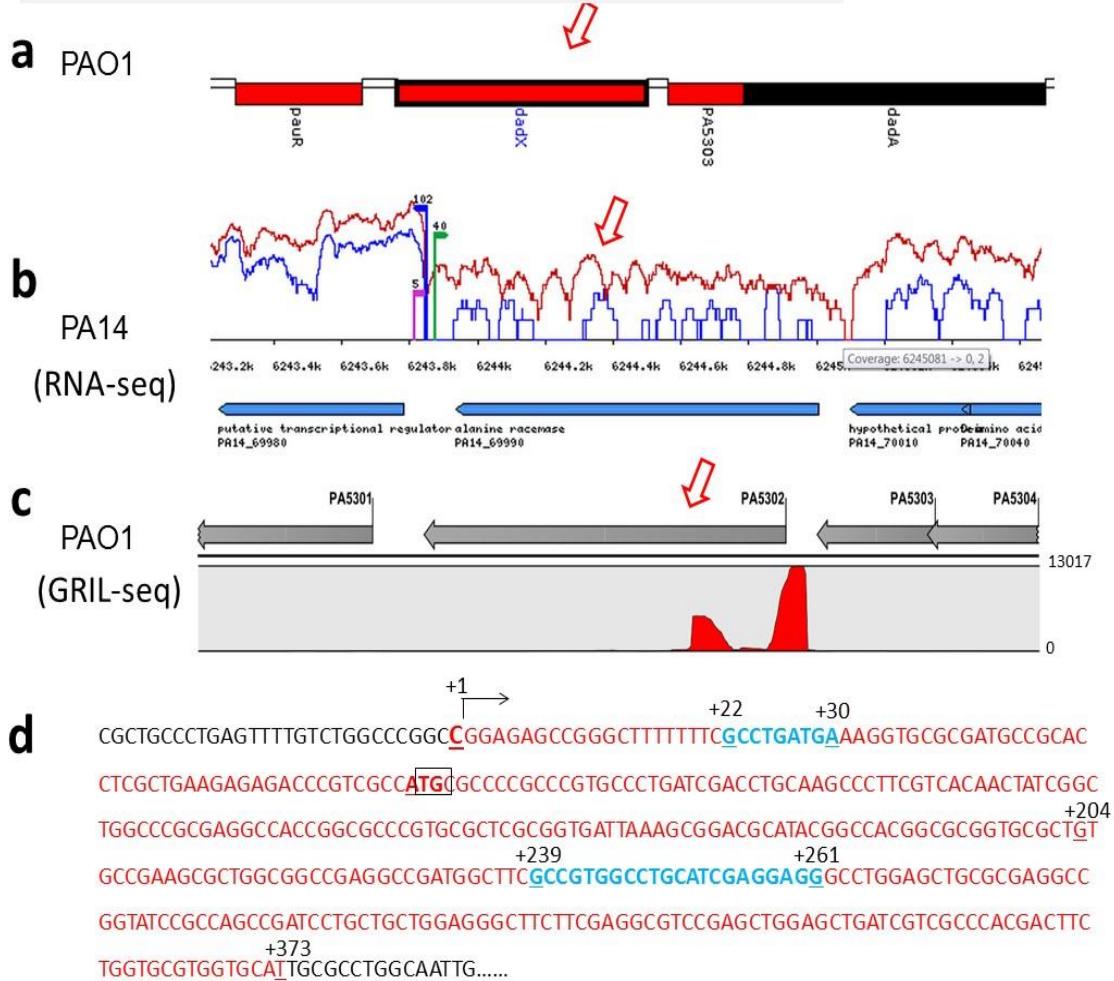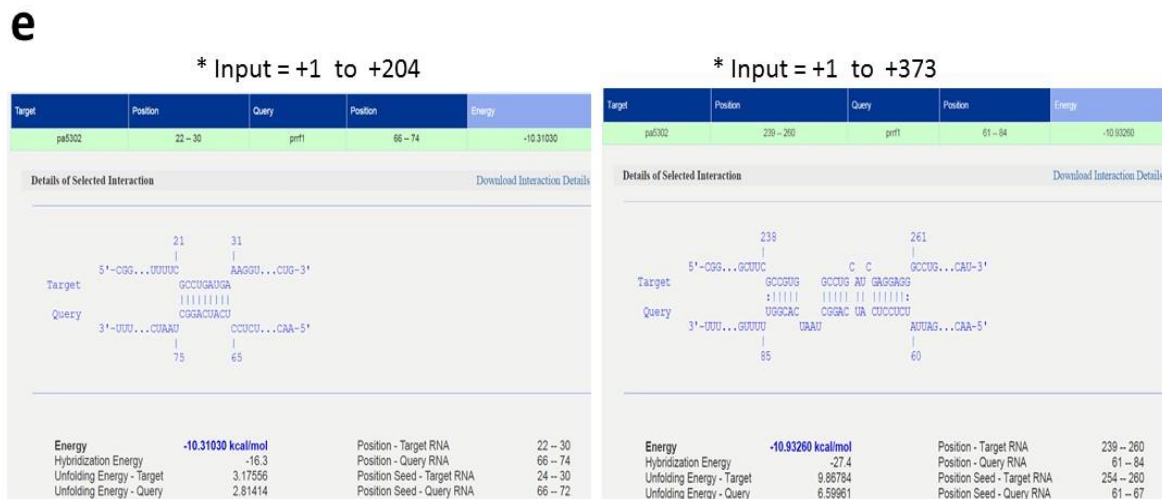

## Supplementary Figure 7 - #39

### #39 PA0832 : conserved hypothetical protein

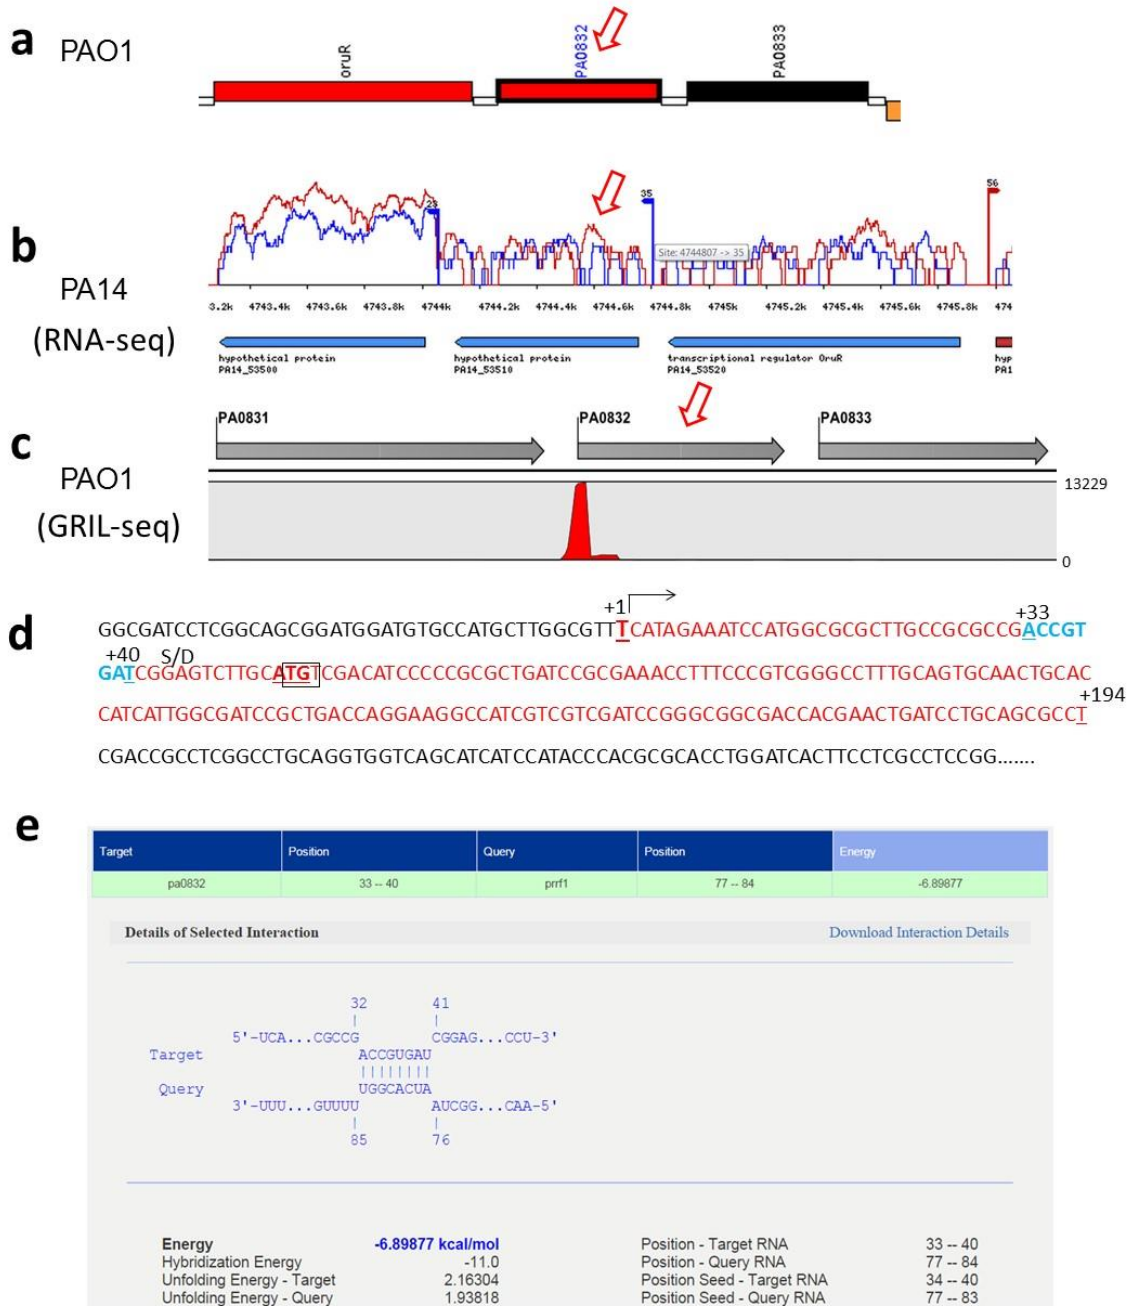

## Supplementary Figure 7 - #40

### #40 PA3262.2: tRNA-Val<sup>3</sup>

**a** PAO1

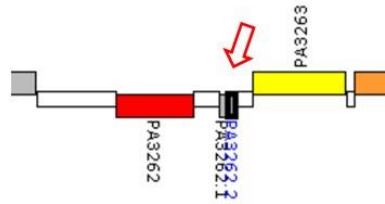

**b** PA14  
(RNA-seq)

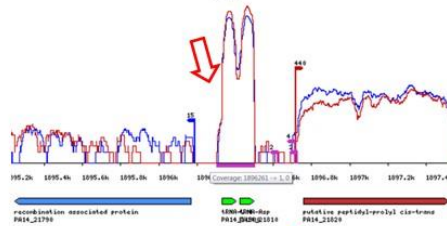

**c** PAO1  
(GRIL-seq)

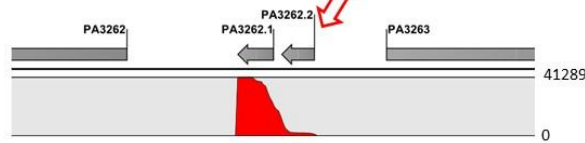

**d**

GCCAGGGGCCAAATCGCTCCGTAGAATGCGCCCCA<sup>+1</sup>CTTCGAGAGTGAAGG<sup>+16</sup>GTGATTAGCTCAGCTGGGAGAGCATCTGCCTT<sup>+17</sup>  
<sup>+66</sup>ACAAGCAGAGGGTGGCG<sup>+66</sup>GTTTCGATCCCGTCATCACCCACCAATCTCGCAAGTTACGCGCAGCGGTAGTTCAGTCGGTTAGAA<sup>+66</sup>  
TACCGCCTGTACAGCCGGGGTTCGCGGGTTCGAGTCCCGTCCGCTGCGCCATTTCTTCTCAGCTG<sup>+200</sup>TATCTTGGCTTCTCT  
 TCCCGTTATAATTCGACTTTTTTCGACGCTTCTTCCACTGTTCTTCTGTCCTCGT...

**e**

| Target  | Position | Query | Position | Energy   |
|---------|----------|-------|----------|----------|
| pat1750 | 17 – 66  | prf1  | 39 – 81  | -9.37551 |

Details of Selected Interaction [Download Interaction Details](#)

```

      16                                     67
      |                                     |
Target 5'-ACU...GAAGG|CAGCU  GC  CCUACAAGCA  G  GUUCG...UGU-3'
          GUGAUUAGCU  GGGAGA  AUCUG  GAGGGUC  GCG
          |||:|:|:|:|  |||:|:|  |||:|:|  |||
Query  3'-UUU...UUUGG|ACUAC  AU  GCUGA  ACCCA...CAA-5'
          |                                     |
          82                                     38
    
```

|                           |                          |                            |         |
|---------------------------|--------------------------|----------------------------|---------|
| <b>Energy</b>             | <b>-9.37551 kcal/mol</b> | Position - Target RNA      | 17 – 66 |
| Hybridization Energy      | -39.6                    | Position - Query RNA       | 39 – 81 |
| Unfolding Energy - Target | 16.74420                 | Position Seed - Target RNA | 56 – 62 |
| Unfolding Energy - Query  | 13.48030                 | Position Seed - Query RNA  | 47 – 53 |



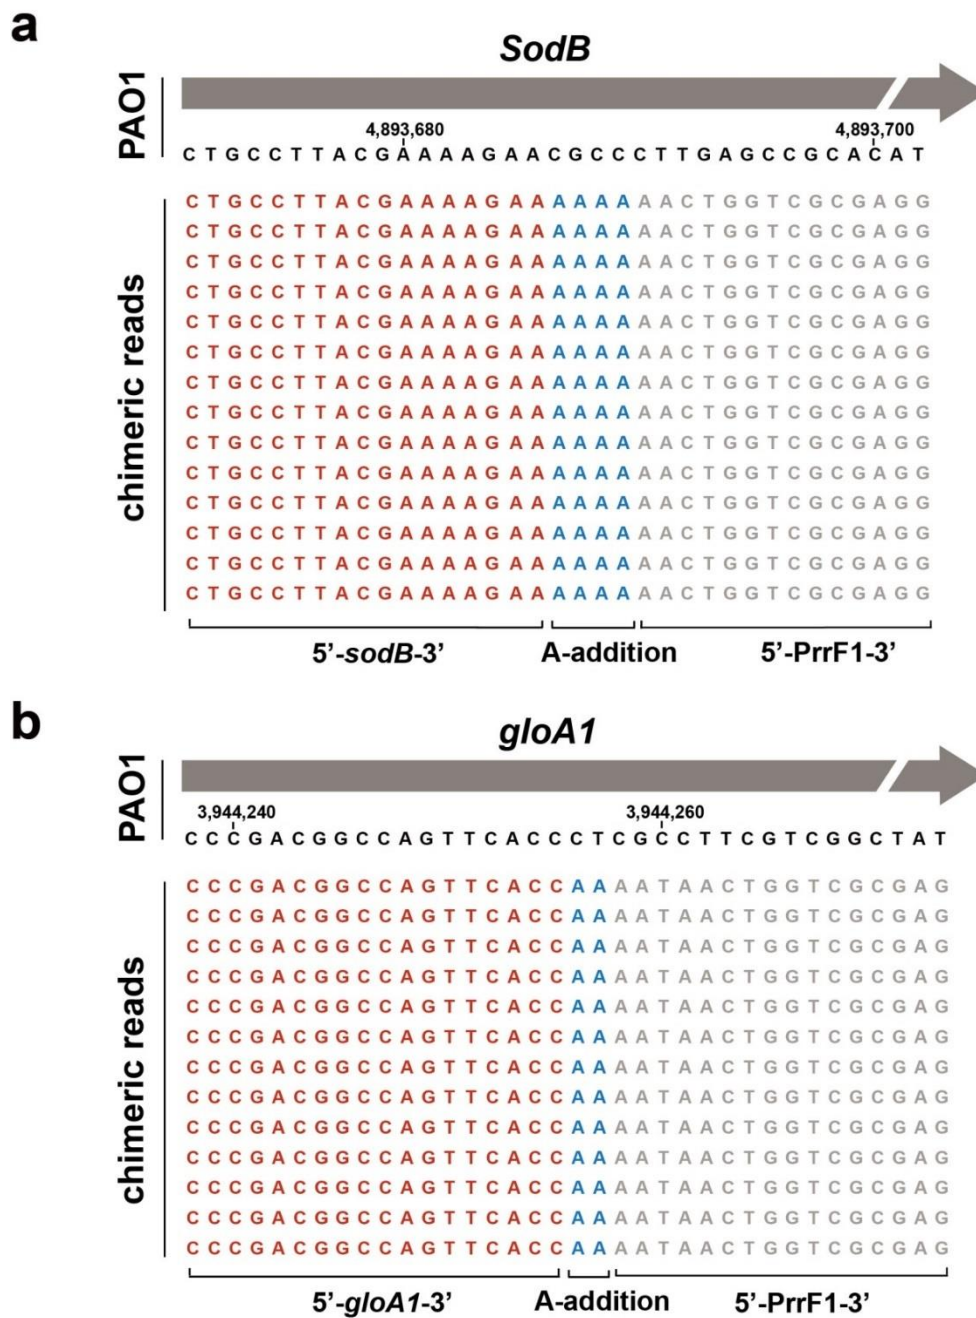

**Supplementary Figure 8. Examples of A-addition (blue) at the T4 RNA ligase created junctions between PrrF1 and target transcripts.** (a) A fraction of *sodB*-PrrF1 chimeric reads reveals addition of four As not found in either sequence. (b) Addition of two As detected in the *gloA1*-PrrF1 chimeras.

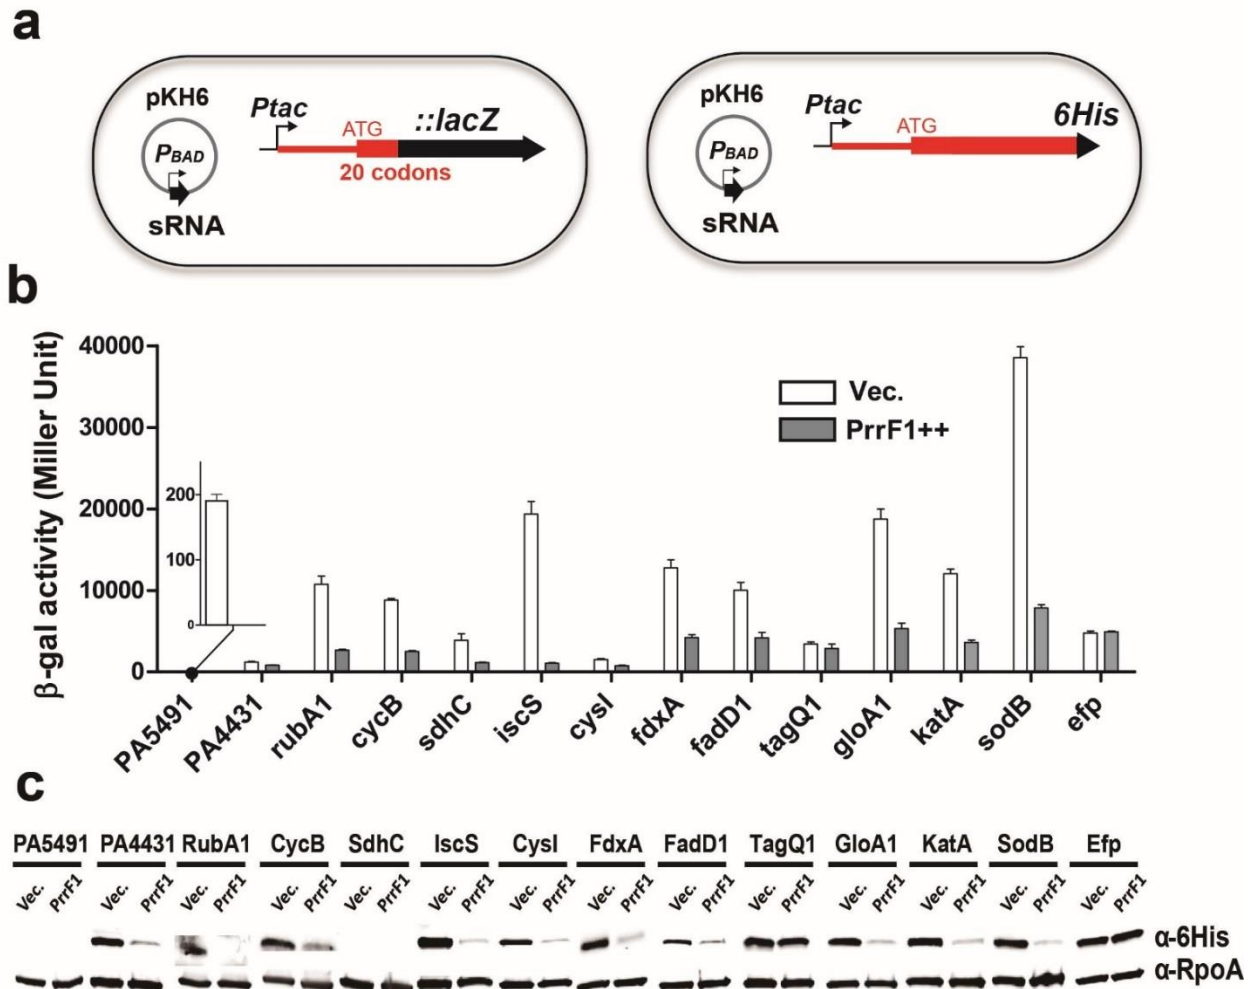

**Supplementary Figure 9. Validation of PrrF1 targets (for top12 mRNA) obtained GRIL-Seq.** (a) Schematic representation of the two types of target mRNAs translational fusions tested in *P. aeruginosa* PAO1  $\Delta prrF1\Delta prrF2$ . The 5' UTRs, including codons for the first 20 amino acids of each target gene, were fused in-frame to *lacZ* (left) or the coding sequence for the entire protein and lacking the stop codons, was fused to the codons for 6His (right). The PrrF1 and mRNA expression were induced with 0.2% arabinose and 100  $\mu$ M IPTG, respectively, at the mid logarithmic growth phase ( $OD_{600} \sim 1.0$ ). After 3.5 hours, the level of the  $\beta$ -galactosidase activity and the Western blot signals were determined, comparing in each case the sRNA effect to that seen with the empty vector (Vec.). *SodB* and *efp* were used as positive and negative controls, respectively. (b)  $\beta$ -galactosidase activity of *lacZ* fusions to the top 12-PrrF1 targets. Results are the average of three independent experiments with the error bars representing the standard deviation of the average. (c) Protein levels of the top 12-PrrF1 targets determined by Western blot detection. RNA polymerase  $\alpha$ -subunit (RpoA) was used as a loading control.

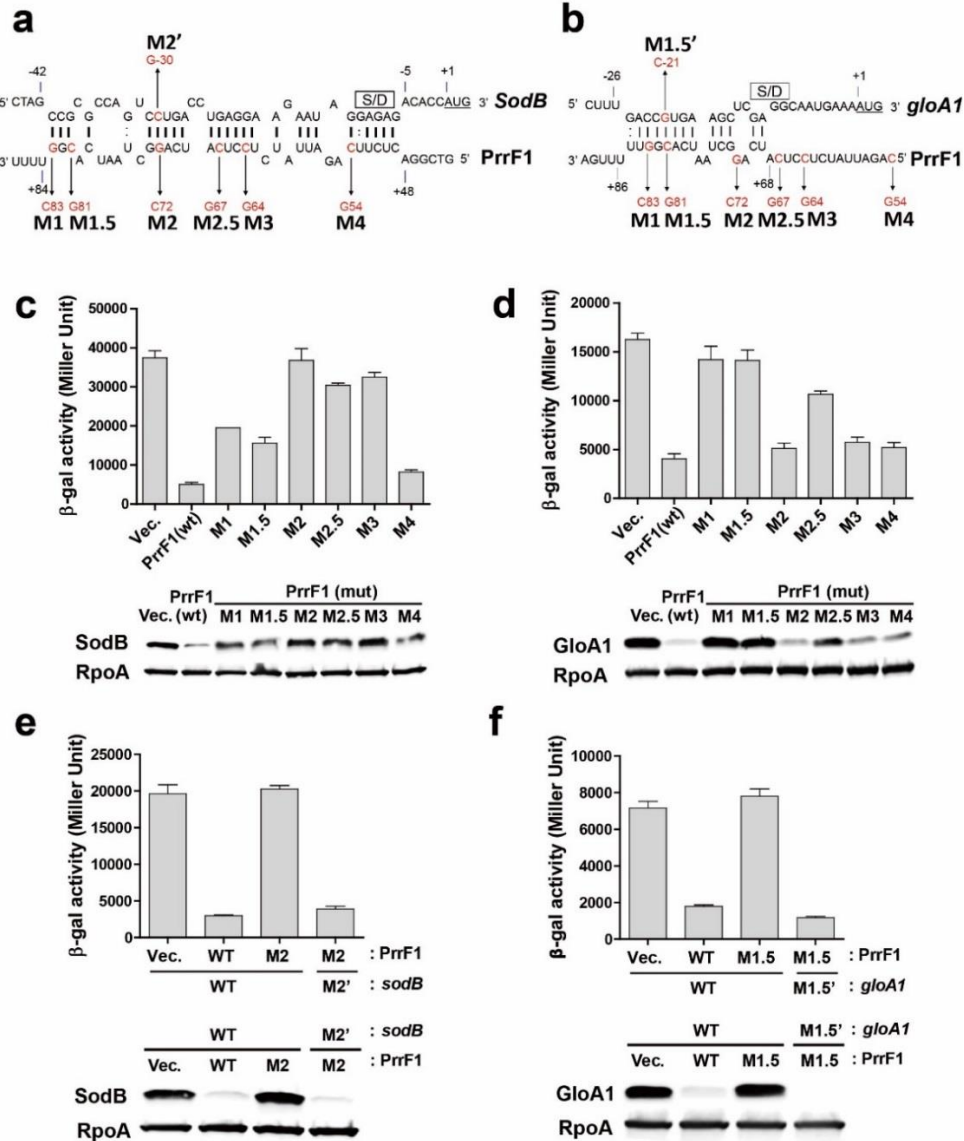

**Supplementary Figure 10. Validation of predicted RNA duplexes formed by PrrF1 with *sodB* or *gloA1* mRNA.** (a) Predicted RNA base pairing of PrrF1 with *sodB* or (b) *gloA1* mRNA. IntaRNA was used to predicted potential interactions. Arrows indicate the location of the substitutional mutations (in red) in the RNA. Total of six PrrF1 mutations (M1 to M4) and a single compensatory mutation (M2' or M1.5') on each mRNA was generated and analyzed using two independent assays:  $\beta$ -galactosidase assay using translational *lacZ* fusions and Western blot of 6His-tagged proteins. Each reporter strain PAO1  $\Delta prrF1\Delta prrF2$  *sodB::lacZ* or *SodB::6His* was transformed with the control vector (Vec.), the plasmid overexpressing PrrF1 wild type (PrrF1 (wt)), or plasmids containing the six PrrF1 mutants. (c) The level of  $\beta$ -galactosidase activity (upper panel) and Western blot analysis (lower panel) of *sodB::lacZ* and *SodB::6His*, respectively are shown. (d) Same as (c), but the level of  $\beta$ -galactosidase activity and the signal of Western blot of *GloA1* are shown. *RpoA* was used as loading control. (e) Compensatory effect of *sodB* (M2')::*lacZ* or *SodB::6His* reporters with respect to PrrF1 mutant (M2) (f) Compensatory effect of *gloA1* (M1.5')::*lacZ* or *GloA1::6His* reporter on the PrrF1 mutant (M1.5). Error bars represent the standard deviation of the average of three biological replicates

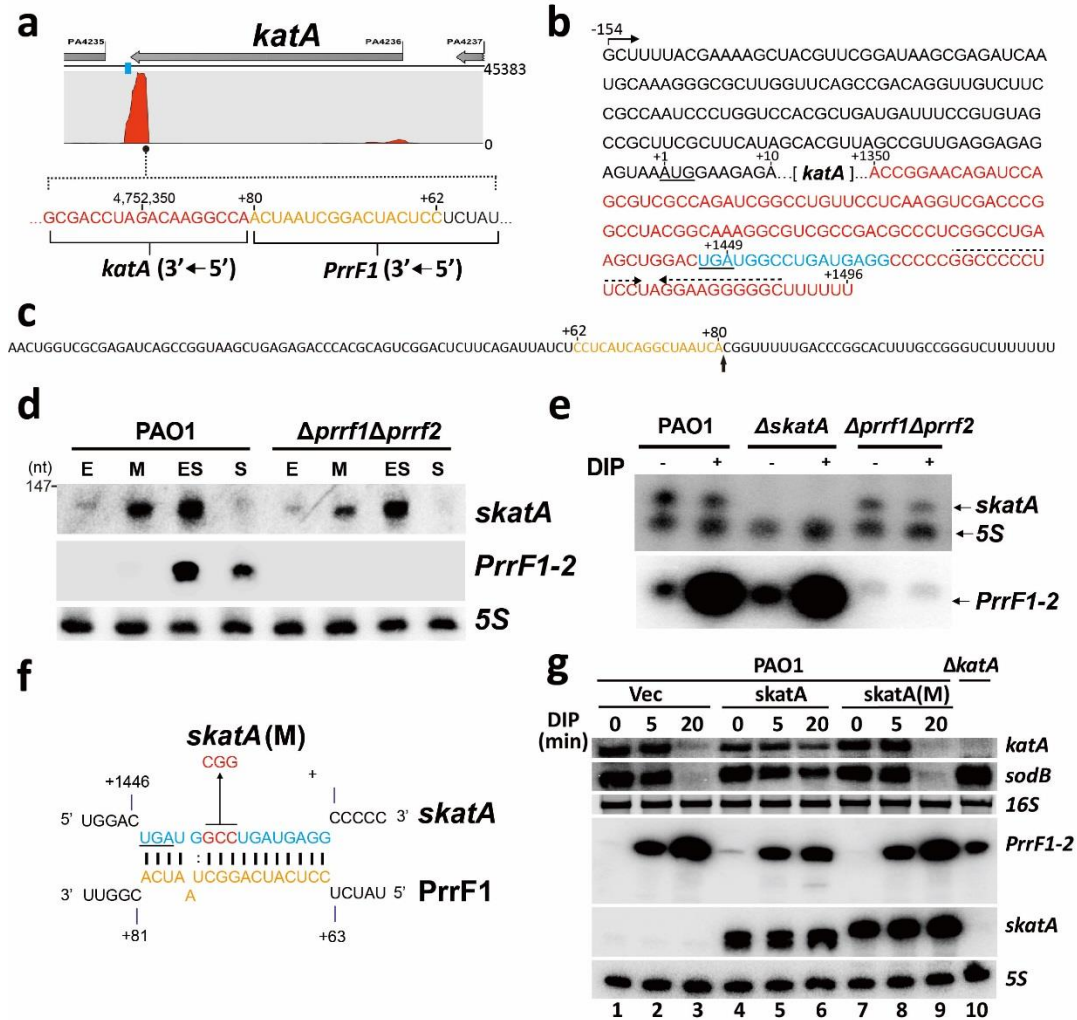

**Supplementary Figure 11. Interaction of PrrF1 with the 3' end of *katA*.** (a) Coverage of *katA*-PrrF1 chimeric reads in GRIL-Seq. The sequence below shows the junction between PrrF1 and *katA*. This information was used to construct the plasmid expressing *skatA*, ~140 nt 3' fragment of *katA*. Orange color indicates the predicted base-pairing region of PrrF1 relative to 3' end of *katA*. (b) Sequence of the portion of *katA* mRNA, showing the location of *skatA* (in red). Numbers indicated are relative to the A of start codon AUG of *katA* (+1); the first nucleotide of *skatA* is at (+1350). Also shown are the *katA* stop codon (+1449) and the inverted repeat of the predicted p-independent terminator sequence. The predicted base-pairing sequence of *skatA* relative to PrrF1 is shown in blue. (c) The locations of the predicted base-pairing region of PrrF1 and the major ligated site with *skatA* are shown in orange and the arrow, respectively. (d) Accumulation of *skatA* at stationary phase analyzed by Northern blotting. RNA was isolated from wild type PAO1 and PAO1 lacking PrrF1 and PrrF2 ( $\Delta prf1\Delta prf2$ ) at four stages of growth in LB: early, mid exponential (E, M) and early, mid stationary (ES, S) based on a growth curve generated by monitoring bacterial growth (optical density at 600 nm). 5S rRNA serves as a loading control. (e) Effect of PrrF1-2 on *skatA* levels. PrrF1 and PrrF2 were induced by addition of 2,2'-dipyridil (DIP) and the Northern blot was first probed with the 5S RNA probe followed by a *katA* probe. RNA was isolated from PAO1, *skatA* mutant and a PrrF1-2 mutant. (f) Predicted base pairing of PrrF1 at 3' end of *katA* mRNA. The stop codon of *katA* mRNA is underlined. Three nucleotide mutations (GCC → CGG) to

generate *skatA* (M) are shown in red and with an arrow. (g). Effect of *skatA* overexpression on PrrF1 regulated transcripts. Strains of PAO1 harboring the empty vector (Vec.), plasmid overexpressing *skatA*, or mutant *skatA* (M) were grown to mid logarithmic phase in LB. After 15 min induction of *skatA* or mutant *skatA* (M), PrrF1 and PrrF2 were induced by addition of DIP. Cells were harvested and total RNA isolated at the time indicated, followed by Northern blot analysis, using various probes indicated on the right column. RNA from a *katA* mutant, grown overnight, was also included in the analysis (lane 10). 5S RNA and 16S RNA serve as a loading control. Results are representative of duplicate experiments.

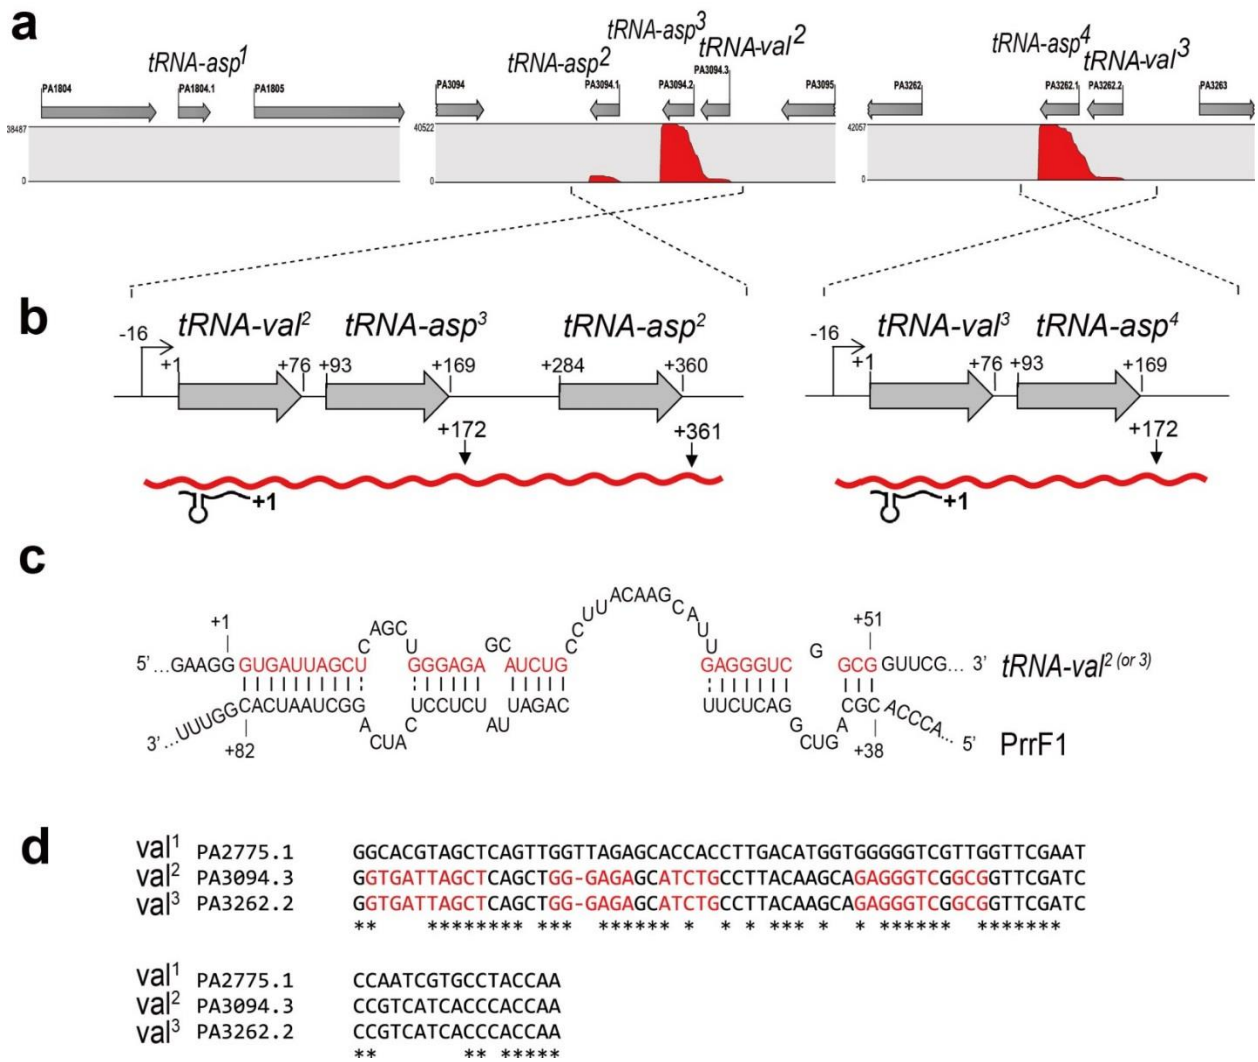

**Supplementary Figure 12. PrrF1 in chimeras with tRNAs.** GRIL-Seq identified three aspartic acid tRNAs (tRNA-asp<sup>2</sup>, -asp<sup>3</sup> and -asp<sup>4</sup>) ligated to PrrF1 by base-pairing with two valyl tRNAs in the unprocessed precursor RNA. (a) Coverage (in red) of PrrF1 chimeric reads at locus of four tRNA-asps and two tRNA-vals in PAO1. (b) Location of the three ligation sites (arrow: +172, +361, and +172) between PrrF1 and the 3' end of tRNA-asp<sup>2</sup>, -asp<sup>3</sup> and -asp<sup>4</sup>. (c) The predicted hybridization between tRNA-val<sup>2</sup> (or val<sup>3</sup>) and PrrF1 using IntaRNA. (d) DNA sequence comparison between three tRNA-vals. Red denotes the corresponding nucleotides in the transcripts involved in base-pairing with PrrF1.

**a**

|                  |          |                                                             |
|------------------|----------|-------------------------------------------------------------|
| asp <sup>1</sup> | PA1804.1 | GAGCGGTAGTTCAGTCGGTTAGAATACCGGCCTGTCACGCCGGGGGTGCGGGTTTCGAG |
| asp <sup>2</sup> | PA3094.1 | GAGCGGTAGTTCAGTCGGTTAGAATACCGGCCTGTCACGCCGGGGGTGCGGGTTTCGAG |
| asp <sup>3</sup> | PA3094.2 | GAGCGGTAGTTCAGTCGGTTAGAATACCGGCCTGTCACGCCGGGGGTGCGGGTTTCGAG |
| asp <sup>4</sup> | PA3262.1 | GAGCGGTAGTTCAGTCGGTTAGAATACCGGCCTGTCACGCCGGGGGTGCGGGTTTCGAG |
| *****            |          |                                                             |
| asp <sup>1</sup> | PA1804.1 | TCCCGTCCGCTCCGCAAGTTACGAGAAGGCGCATC                         |
| asp <sup>2</sup> | PA3094.1 | TCCCGTCCGCTCCGCAATACATCTTACCACGCCG                          |
| asp <sup>3</sup> | PA3094.2 | TCCCGTCCGCTCCGCAATTCACTTCCCCTCCCGAG                         |
| asp <sup>4</sup> | PA3262.1 | TCCCGTCCGCTCCGCAATTTCTTCTCAGCTGTA                           |
| *****            |          |                                                             |

**b**

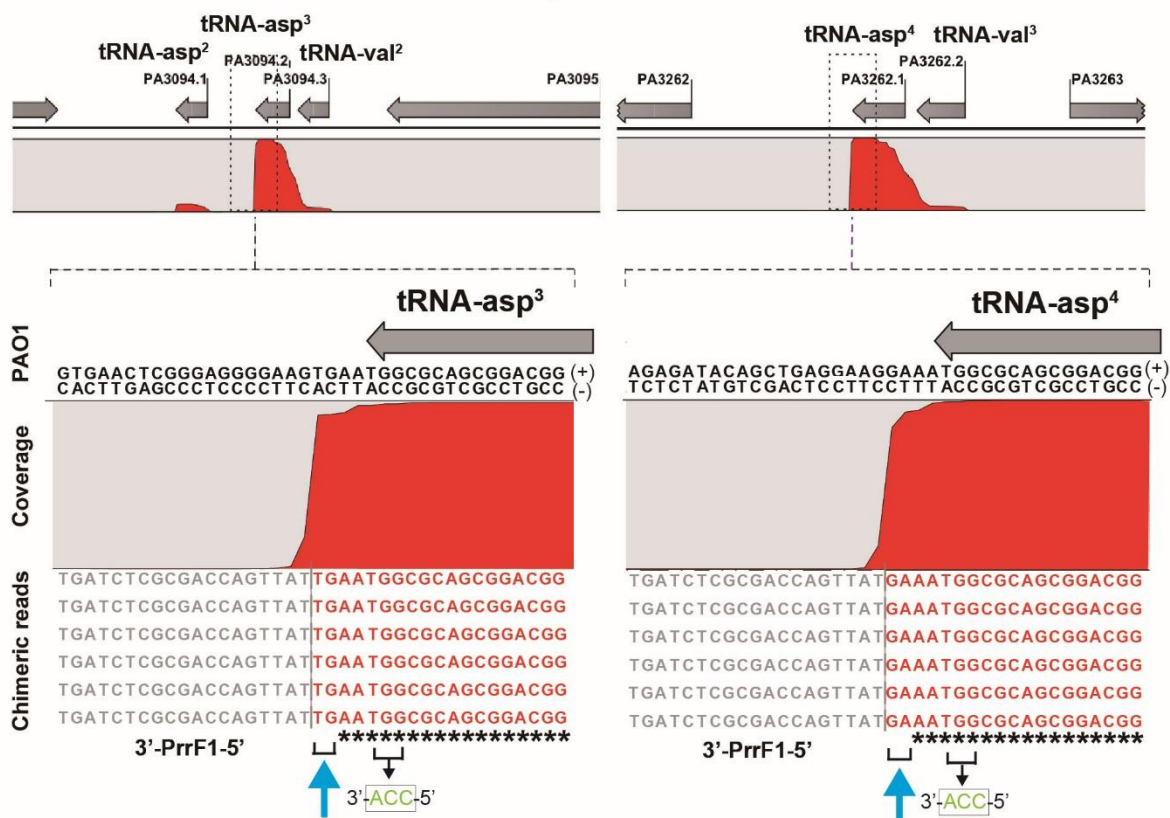

**Supplementary Figure 13. Ligation of PrrF1 to precursor tRNA-asp<sup>2</sup>, -asp<sup>3</sup>, and -asp<sup>4</sup>.** (a) DNA sequence alignment of tRNA-asps and partial precursor sequences at their 3' ends. The mature tRNA-asps are shown in green and the CCA sequences are boxed. The arrow in black indicates the unique sequences in the precursor tRNA molecules that allowed differentiating among the four tRNAs. (b) A detailed examples showing how the PrrF1 chimeric reads with two precursor tRNAs (asp<sup>3</sup> and asp<sup>4</sup>) mapped on the PAO1 genome. The arrows in blue indicate the specific sequences found in the precursor transcripts containing the individual tRNA-asp while the identical sequences of these tRNAs are marked with stars. The location corresponding to the ends of mature 3' tRNAs (CCA) in the chimeras is also shown in boxes.

Supplementary Figure 14. Uncropped images of Figs.1c, 2c, 2d, and 2e and Supplementary Figs. 4a, 4b, 9c, 10c, 10d, 10e, 10f, 11d, 11e, and 11g.

Uncropped Figure 1c

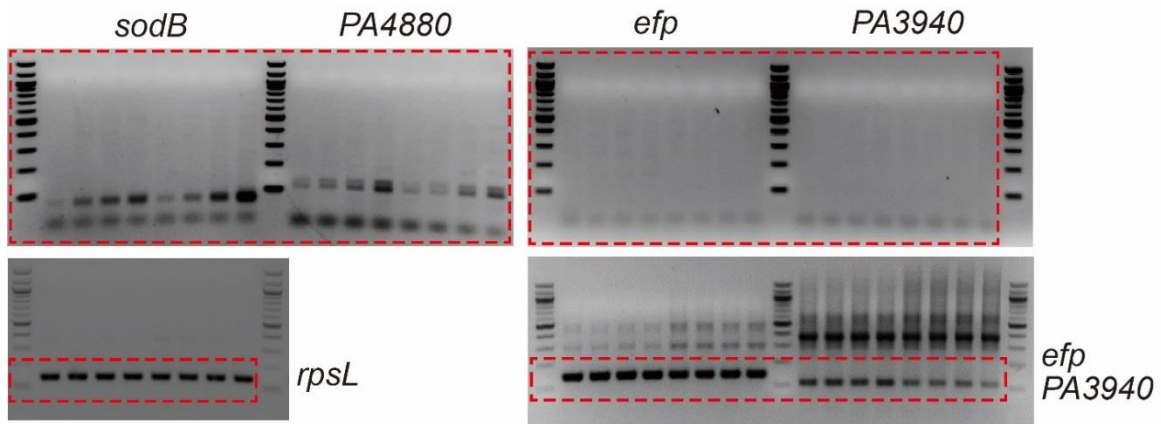

Uncropped Figure 2c

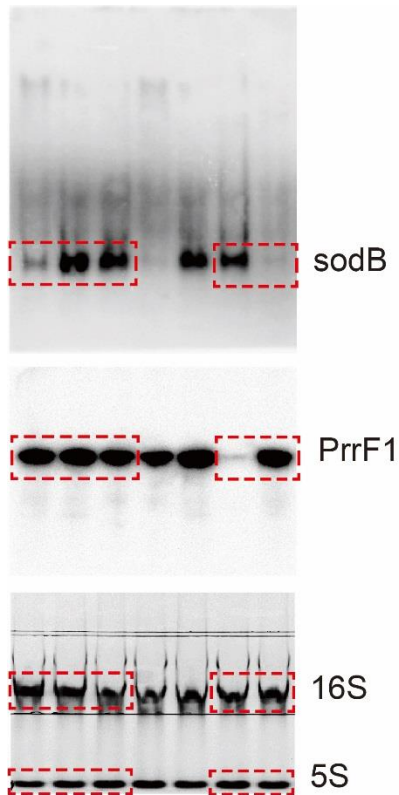



Uncropped Figure 2d-e

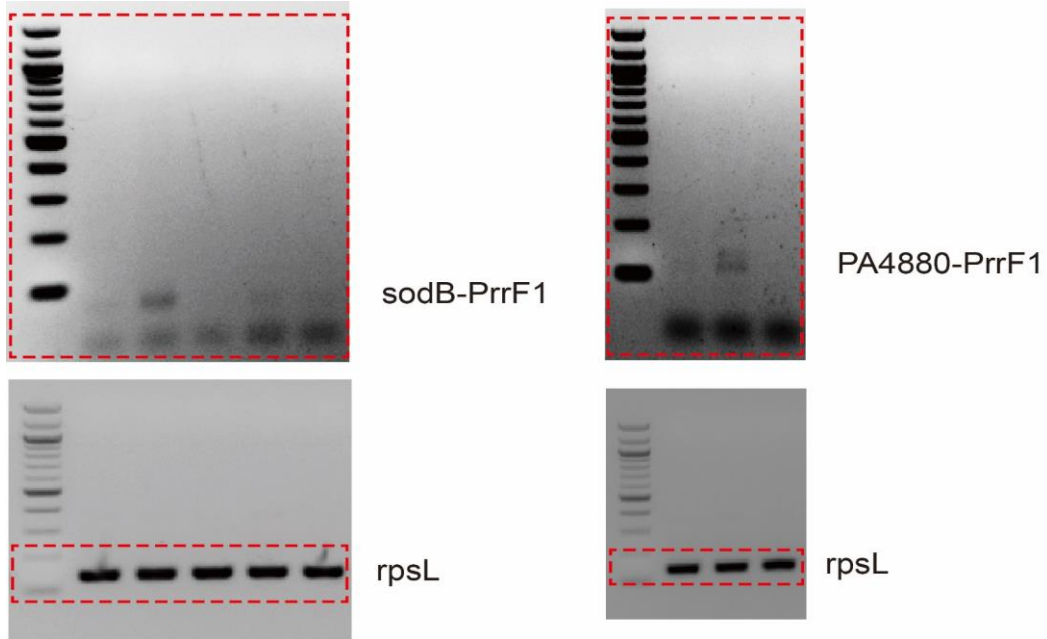

Uncropped Figure 2g

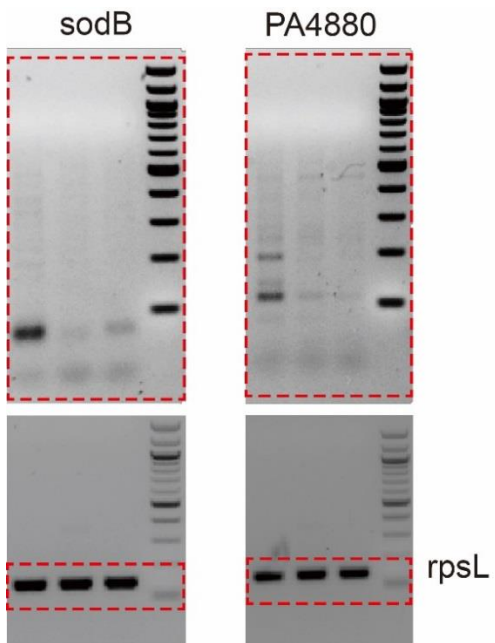

Uncropped Supplementary Figure 4a-b

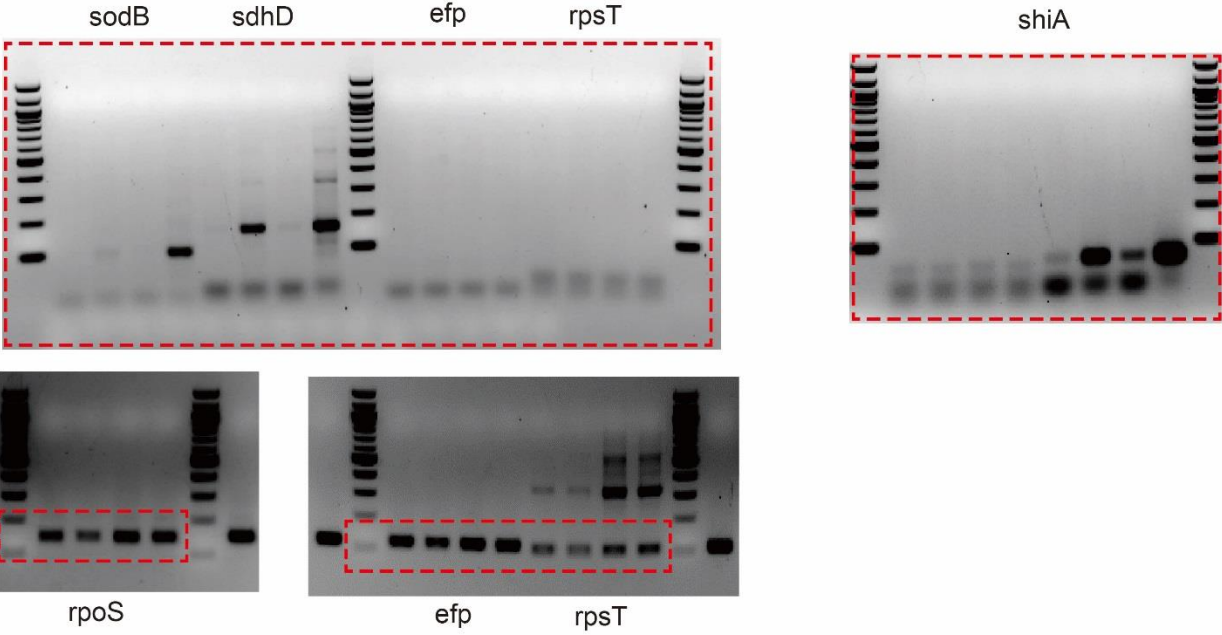

Uncropped Supplementary Figure 9c

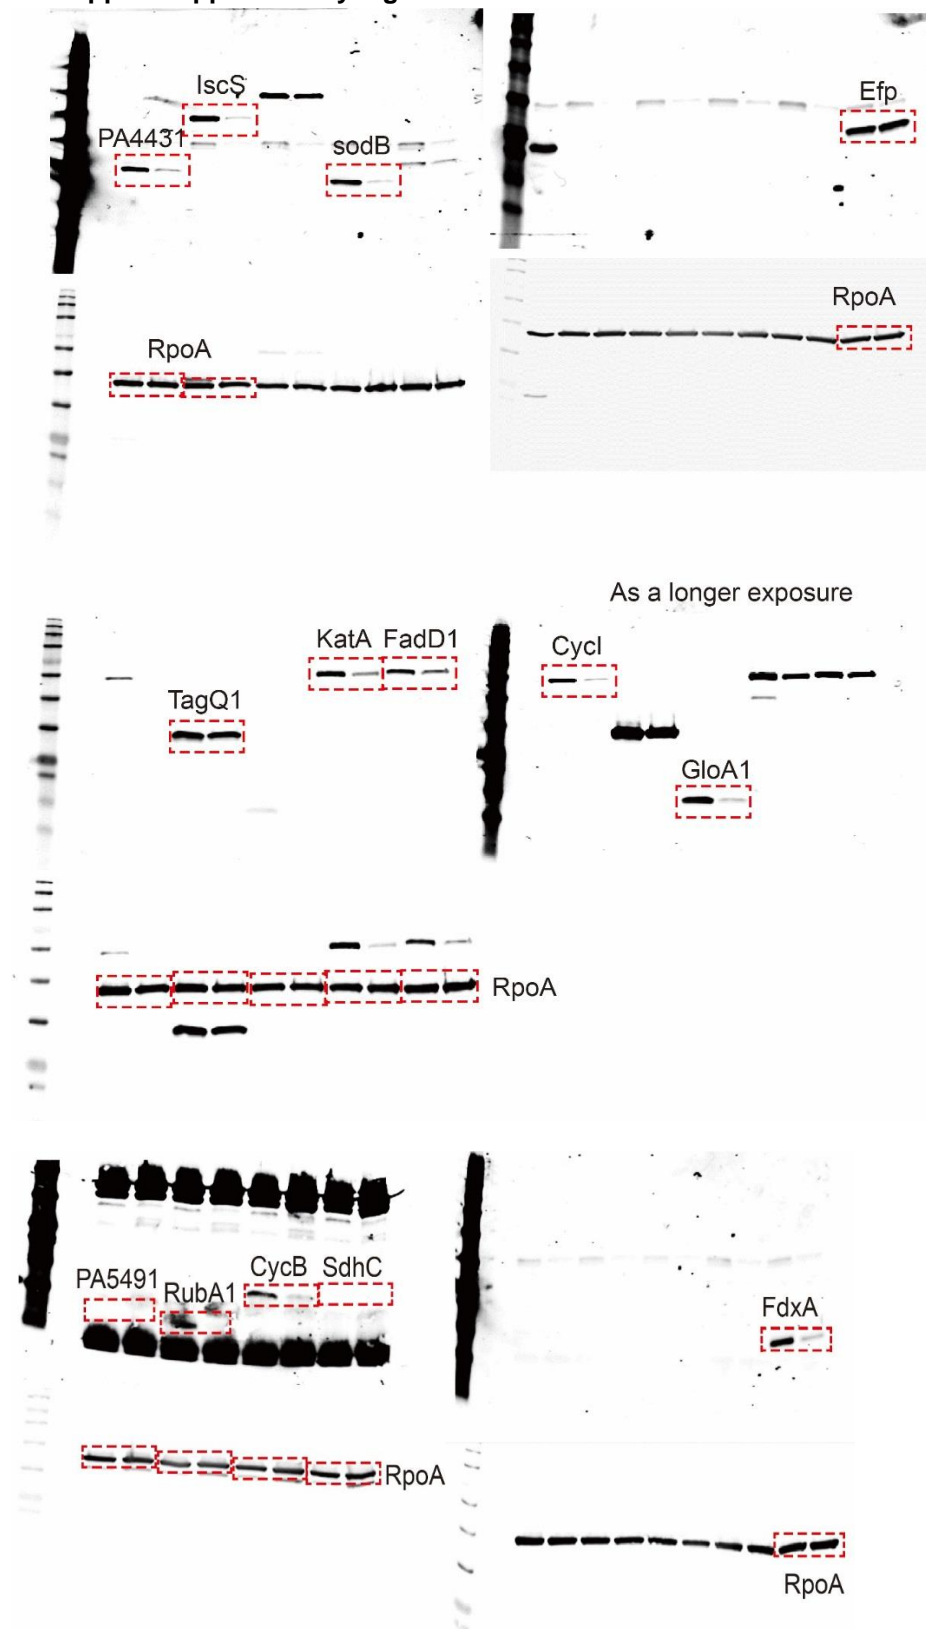

Uncropped Supplementary Figure 10c

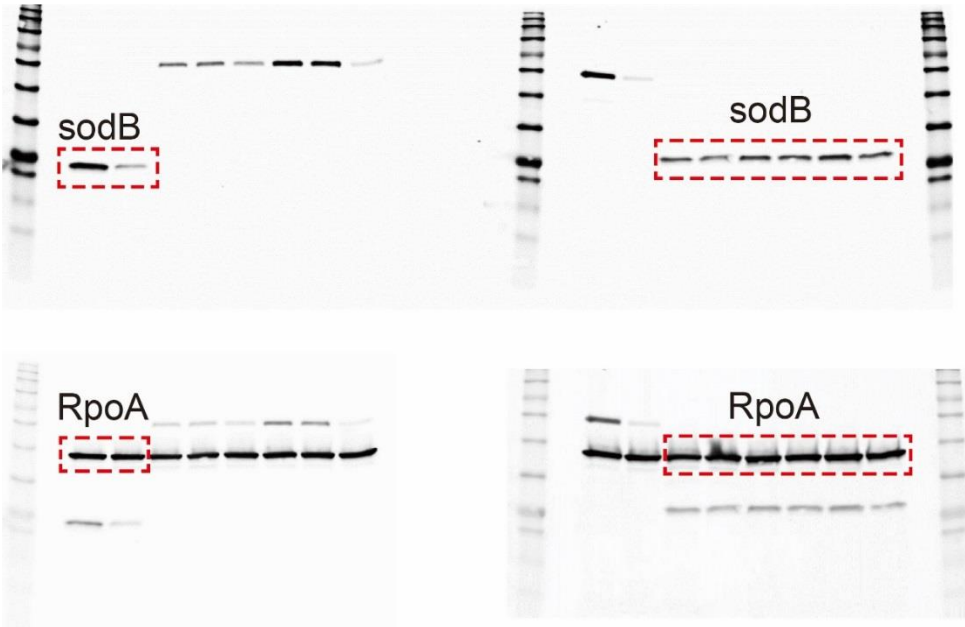

Uncropped Supplementary Figure 10d

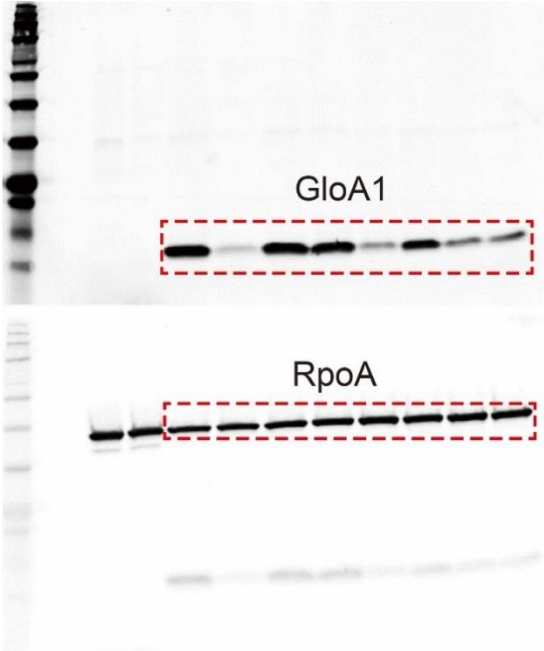

Uncropped Supplementary Figure 10e

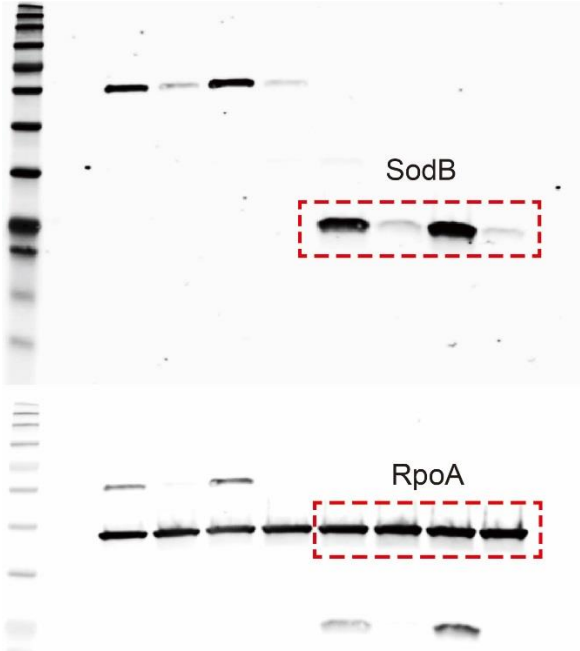

Uncropped Supplementary Figure 10f

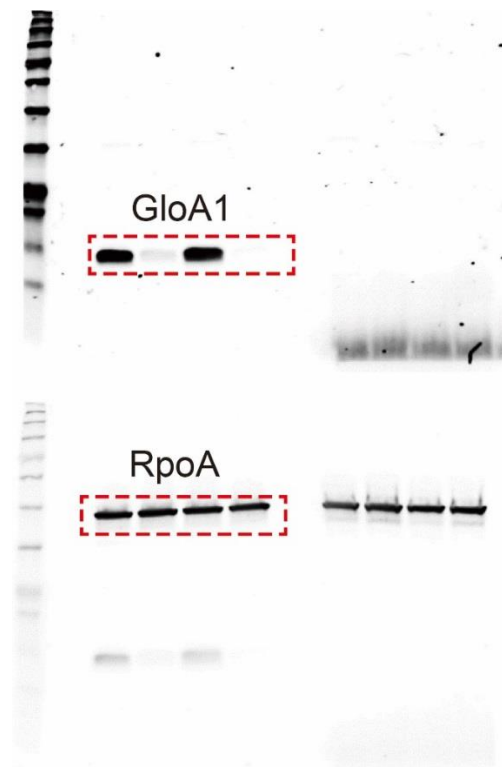

Uncropped Supplementary Figure 11d

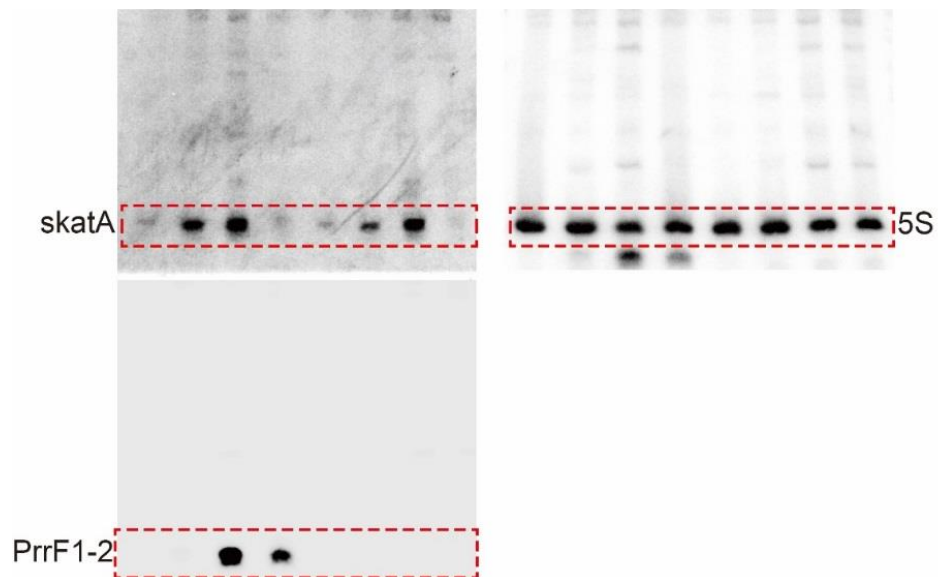

Uncropped Supplementary Figure 11e

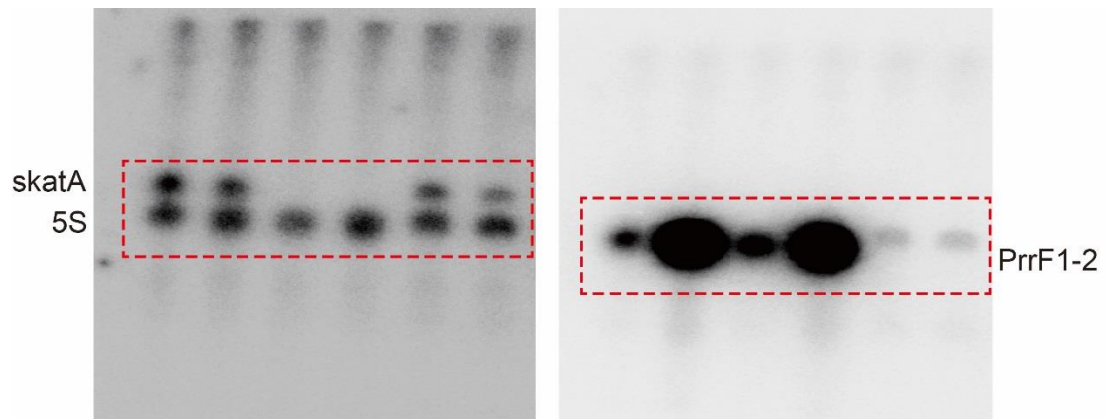

Uncropped Supplementary Figure 11g

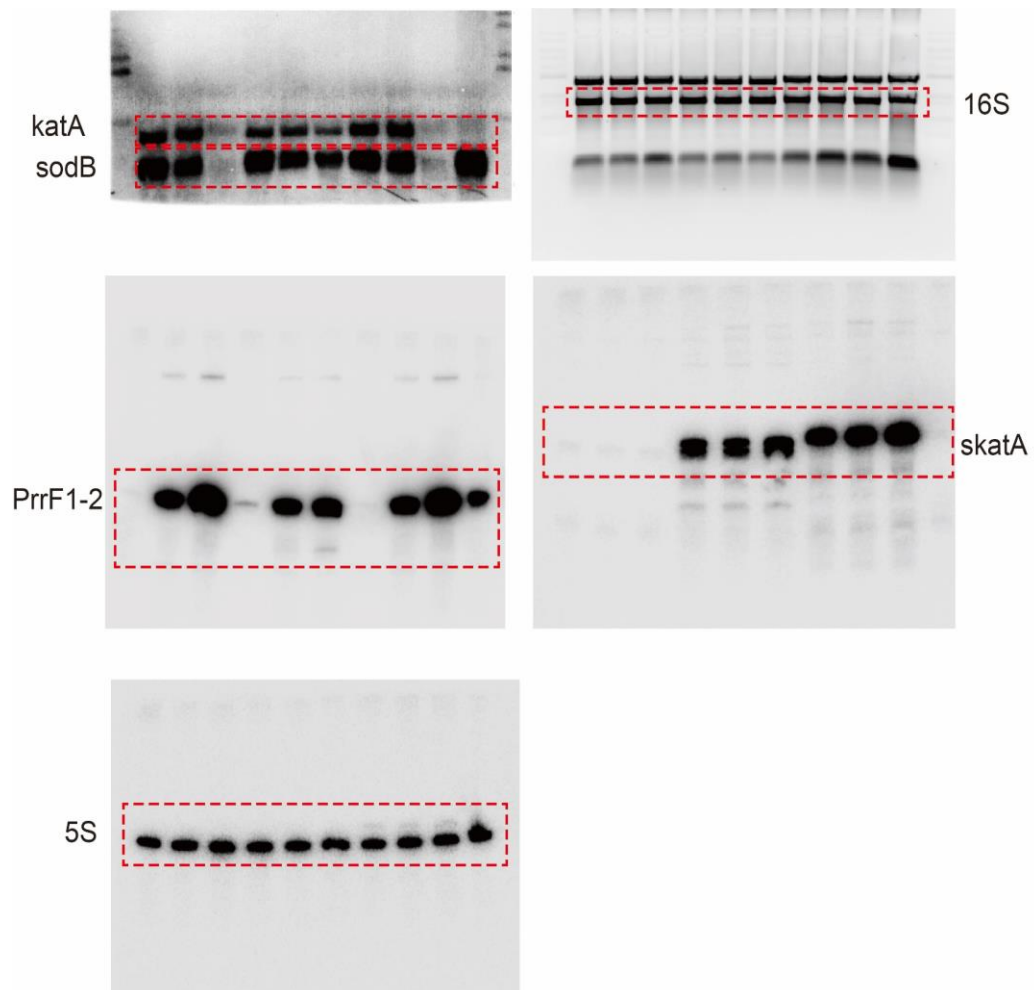

**Supplementary Figure 15. Sequences used in this study.**

**PrrF1 sRNA**

AACTGGTCGCGAGATCAGCCGGTAAGCTGAGAGACCCACGCAGTCGGACTCTTCAGATTATCTCCT  
CATCAGGCTAATCACGGTTTTTTGACCCGGCACTTTGCCGGTCTTTTTTT

**RyhB sRNA**

GCGATCAGGAAGACCCTCGCGGAGAACCTGAAAGCACGACATTGCTCACATTGCTTCCAGTATTACT  
TAGCCAGCCGGGTGCTGGCTTTT

**skatA sRNA**

ACCGGAACAGATCCAGCGTCGCCAGATCGGCCTGTTCTCAAGGTCGACCCGGCCTACGGCAAAG  
GCGTCGCCGACGCCCTCGGCCTGAAGCTGGACTGATGGCCTGATGAGGCCCCCGGCCCTTCT  
AGGAAGGGGGCTTTTTT

**T4 RNA ligase (*t4rnI1*)**

ATGCAAGAACTTTTTAACAATTTAATGGAACATGTAAGGATTCGCAGCGTAAGTTTTTTTTACTCAGAT  
GATGTAAGTGCATCTGGAAGAACTTACAGAATTTTCTCATATAATTATGCATCTTATTCTGATTGGTTA  
CTTCCAGATGCACTAGAATGTCGTGGAATTATGTTTGAAATGGATGGAGAAAAACCAGTAAGAATTGC  
TTCTCGTCTATGGAAAAGTTTTTTAACTTGAATGAAAATCCGTTACGATGAATATCGATTTAAACGA  
TGTTGATTATATTCTAACAAAAGAAGACGGGTCTTTGGTATCAACTTATTTAGACGGTGATGAAATTCT  
GTTCAAATCAAAGGGTTCAATCAAATCTGAGCAGGCTTTAATGGCTAATGGAATTTTGATGAATATTAA  
TCACCATCGGTTGCGTGATAGACTTAAAGAATTAGCTGAAGATGGATTTACTGCTAACTTCGAATTCC  
TTGCCCGACGAATAGAATCGTTCTTGCTTATCAAGAGATGAAAATTATTTTACTGAATGTTTCGTGAAA  
ACGAAACGGGTGAATACATTTACATACGATGATATTTATAAAGATGCTACTCTTCGTCCGTATCTAGTT  
GAACGATACGAAATCGATAGCCCTAAATGGATAGAAGAAGCTAAAAATGCAGAAAACATCGAAGGCT  
ATGTTGCTGTGATGAAAGATGGTTCTCATTTTTAAAATTAAGTCTGACTGGTACGTGTCTCTTCATAGTA  
CAAAAAGTTCATTAGATAATCCAGAAAAATTGTTTAAGACTATTATTGATGGTGCATCAGATGATCTTA  
AAGCAATGTATGCTGACGATGAATATTCATACAGAAAAATTGAAGCATTTGAAACGACTTATCTGAAG  
TACTTAGACCGAGCTCTGTTTTTAGTTCTTGACTGTCATAATAAGCATTGCGGTAAGGATAGAAAGAC  
TTATGCAATGGAAGCACAAAGGTGTTGCTAAAGGTGCTGGAATGGATCACCTGTTCCGGTATCATCATG  
AGCTTATAACCAGGGGTACGATAGTCAAGAAAAGGTCATGTGTGAAATCGAACAGAAATTTTTTGAAAA  
TTATAAAAAATTTATCCAGAAGGATACTAA



**Supplementary Table 1 [Separate File]:** RNA-seq analysis

**Supplementary Table 2 [Separate File]:** GRIL-seq analysis

**Supplementary Table 3:** Top 40 targets ranked according to the maximal coverage in GRIL-Seq.

| Rank | Locus tag | Name  | Max coverage | Product Name                                             | a     | b | c | d  |
|------|-----------|-------|--------------|----------------------------------------------------------|-------|---|---|----|
| 1    | PA4726.11 | crcZ  | 338186       | ncRNA                                                    |       |   |   |    |
| 2    | PA5491    |       | 272196       | cytochrome                                               |       | ■ | ■ |    |
| 3    | PA4431    |       | 204548       | iron-sulfur protein                                      |       | ■ | ■ | 71 |
| 4    | PA5351    | rubA1 | 158050       | rubredoxin                                               |       | ■ | ■ | 9  |
| 5    | PA5300    | cycB  | 154313       | cytochrome C5                                            |       | ■ | ■ | 13 |
| 6    | PA1581    | sdhC  | 150967       | succinate dehydrogenase subunit C                        | (1,2) | ■ | ■ | 2  |
| 7    | PA3814    | iscS  | 141040       | cysteine desulfurase                                     |       | ■ | ■ | 3  |
| 8    | PA1838    | cysI  | 80581        | sulfite reductase                                        |       | ■ | ■ |    |
| 9    | PA3621    | fdxA  | 56776        | ferredoxin I                                             |       | ■ | ■ | 4  |
| 10   | PA3299    | fadD1 | 53252        | long-chain-fatty-acid--CoA ligase                        |       |   |   |    |
| 11   | PA0070    | tagQ1 | 52081        | T6SS                                                     |       |   |   |    |
| 12   | PA3524    | gloA1 | 46443        | lactoylglutathione lyase                                 |       |   |   |    |
| 13   | PA4236    | katA  | 44545        | catalase                                                 | (1)   | ■ | ■ |    |
| 14   | PA1069    |       | 43627        | hypothetical protein                                     |       |   |   |    |
| 15   | PA3262.1  |       | 41289        | Asp tRNA                                                 |       |   |   |    |
| 16   | PA3094.2  |       | 40509        | Asp tRNA                                                 |       |   |   |    |
| 17   | PA1750    |       | 38745        | phospho-2-dehydro-3-deoxyheptonate aldolase              |       |   |   |    |
| 18   | PA0846    | trxB2 | 37196        | thioredoxin reductase                                    |       | ■ | ■ |    |
| 19   | PA3996    | lis   | 35545        | lipoate synthase                                         |       | ■ |   |    |
| 20   | PA4423    |       | 34345        | putative lipoprotein                                     |       |   |   |    |
| 21   | PA4454    |       | 30002        | conserved hypothetical protein                           |       |   |   | 57 |
| 22   | PA1610    | fabA  | 29790        | 3-hydroxydecanoyl-ACP dehydratase                        |       |   |   |    |
| 23   | PA1777    | oprF  | 28783        | porin                                                    |       |   |   |    |
| 24   | PA4242    | rpmJ  | 26892        | 50S ribosomal protein L36                                |       |   |   |    |
| 25   | PA1787    | acnB  | 25808        | aconitate hydratase 2                                    | (1)   | ■ | ■ | 16 |
| 26   | PA1554    | ccoN1 | 24260        | cytochrome c oxidase, cbb3-type, CcoN subunit            |       | ■ | ■ |    |
| 27   | PA4880    |       | 22422        | bacterioferritin                                         | (1,2) | ■ | ■ | 65 |
| 28   | PA3169    |       | 21769        | 5-methylthioribose-1-phosphate isomerase MtnA            |       |   |   |    |
| 29   | PA0085    | hcp1  | 20399        | T6SS                                                     |       |   |   |    |
| 30   | PA2953    |       | 19407        | electron transfer flavoprotein-ubiquinone oxidoreductase |       | ■ | ■ | 41 |
| 31   | PA0905    | rsmA  | 17010        | RsmA                                                     |       |   |   |    |
| 32   | PA3603    | dgkA  | 16834        | diacylglycerol kinase                                    |       |   |   |    |
| 33   | PA2830    | htpX  | 15593        | heat shock protein HtpX                                  |       |   |   |    |
| 34   | PA5490    | cc4   | 14265        | cytochrome c4 precursor                                  |       | ■ | ■ | 1  |
| 35   | PA4366    | sodB  | 14027        | superoxide dismutase                                     | (1,2) | ■ | ■ |    |
| 36   | PA3121    | leuC  | 13680        | 3-isopropylmalate dehydratase large subunit              |       | ■ | ■ | 31 |
| 37   | PA4812    | fdnG  | 13169        | formate dehydrogenase-O, major subunit                   |       | ■ | ■ |    |
| 38   | PA5302    | dadX  | 12748        | catabolic alanine racemase                               |       |   |   |    |
| 39   | PA0832    |       | 11985        | conserved hypothetical protein                           |       |   |   |    |
| 40   | PA3262.2  |       | 11590        | tRNA-Val                                                 |       |   |   |    |

**a** ■ : Known in previous studies. The number denotes the references (1: Oglesby A. G. *et al.*<sup>5</sup>, 2: Wilderman P. J. *et al.*<sup>7</sup>). **b** ■ : Iron containing protein. **c** ■ : Heme containing (4Fe-4S or 2Fe-2S). **d** ■ : Ranked within top 100 analyzed by CopraRNA prediction. The number represents the rank of the corresponding gene.

**Supplementary Table 4: Strains and Plasmids used in this study.**

| Strain                          | Genotype/relevant features                                                                                                                                                                                                                                     | Source/reference                       |
|---------------------------------|----------------------------------------------------------------------------------------------------------------------------------------------------------------------------------------------------------------------------------------------------------------|----------------------------------------|
| <b><i>P. aeruginosa</i></b>     |                                                                                                                                                                                                                                                                |                                        |
| PAO1                            | wild-type                                                                                                                                                                                                                                                      | Michael Vasil's lab                    |
| PAO1 $\Delta$ <i>hfq</i>        | Isogenic deletion strain constructed with pEXG2- $\Delta$ <i>hfq</i>                                                                                                                                                                                           | Lab collection                         |
| PAO1 $\Delta$ <i>rppH</i>       | Isogenic deletion strain constructed with pEXG2- $\Delta$ <i>rppH</i>                                                                                                                                                                                          | This work                              |
| PAO1 $\Delta$ <i>prf1prf2</i>   | Isogenic deletion strain constructed with pEXG2- $\Delta$ <i>prf1prf2</i>                                                                                                                                                                                      | This work                              |
| PAO1 $\Delta$ <i>katA</i>       | Isogenic deletion strain constructed with pEXG2- $\Delta$ <i>katA</i>                                                                                                                                                                                          | This work                              |
| PAO1 $\Delta$ <i>skatA</i>      | Isogenic deletion strain constructed with pEXG2- $\Delta$ <i>skatA</i>                                                                                                                                                                                         | This work                              |
| PT4P1                           | PAO1 strain containing both plasmid pKH13- <i>t4rn1</i> and pKH6-PrrF1                                                                                                                                                                                         | This work                              |
| <b><i>E. coli</i></b>           |                                                                                                                                                                                                                                                                |                                        |
| SM10 $\lambda$ pir              | <i>thi-1 leuB6 supE44 tonA21 lacY1 recA::RP4-2-Tc::Mu Km<sup>R</sup></i>                                                                                                                                                                                       | Simon <i>et al.</i> <sup>17</sup>      |
| Stellar Competent Cell          | <i>F<sup>-</sup>, endA1, supE44, thi-1, recA1, relA1, gyrA96, phoA, <math>\Phi</math>80d lacZ<math>\Delta</math> M15, <math>\Delta</math> (lacZYA - argF) U169, <math>\Delta</math> (mrr - hsdRMS - mcrBC), <math>\Delta</math>mcrA, <math>\lambda</math>-</i> | Clontech                               |
| ET4R1                           | <i>E. coli</i> MG1655 containing both plasmid pKH13- <i>t4rn1</i> and pKH6-RyhB                                                                                                                                                                                | This work                              |
| <b>Plasmids</b>                 | <b>Relevant features</b>                                                                                                                                                                                                                                       | <b>Source/reference</b>                |
| pEXG2                           | ColE1 suicide vector; mob sacB Gen <sup>R</sup>                                                                                                                                                                                                                | Rietsch <i>et al.</i> <sup>18</sup>    |
| pEXG2- $\Delta$ <i>rppH</i>     | pEXG2 with flanking regions to introduce an unmarked <i>rppH</i> (PA0336)                                                                                                                                                                                      | This work                              |
| pEXG2- $\Delta$ <i>prf1prf2</i> | pEXG2 with flanking regions to introduce an unmarked <i>prf1</i> and <i>prf2</i>                                                                                                                                                                               | This work                              |
| pEXG2- $\Delta$ <i>katA</i>     | pEXG2 with flanking regions to introduce an unmarked <i>katA</i> (PA4236) including 5' and 3' UTR of <i>katA</i>                                                                                                                                               | This work                              |
| pEXG2- $\Delta$ <i>skatA</i>    | pEXG2 with flanking regions to introduce an unmarked <i>skatA</i>                                                                                                                                                                                              | This work                              |
| pEXG2-tagQ1-6H                  | pEXG2 with flanking regions to introduce six His tagged tagQ1                                                                                                                                                                                                  | This work                              |
| pRK2013                         | ColE1 Tra1 Mob1 (pRK2) Km <sup>R</sup>                                                                                                                                                                                                                         | Figurski and Hellinski <sup>19</sup>   |
| pMMB67EH                        | Broad-host-range expression vector from Ptac; lacIq, Amp <sup>R</sup>                                                                                                                                                                                          | Furste <i>et al.</i> <sup>20</sup>     |
| pPSV40                          | pBR322 origin of replication, Gen <sup>R</sup>                                                                                                                                                                                                                 | Rietsch <i>et al.</i> <sup>21</sup>    |
| pPSV40-1                        | modification of HindIII site of pPSV40                                                                                                                                                                                                                         | This work                              |
| pKH4                            | pMMB67EH derivative vector: tac promoter with two lac operator sites at upstream of the -35 element and between -35 and -10 elements                                                                                                                           | This work                              |
| pKH7                            | pPSV40-1-derivated vector: lacIq, Ptac and rrnB terminator of pMMB67EH was cloned to pPSV40-1                                                                                                                                                                  | This work                              |
| pKH11                           | pKH7-derivated vector: Gen <sup>R</sup> was changed to Carb <sup>R</sup>                                                                                                                                                                                       | This work                              |
| pBTK27                          | Broad host range expression vector derivated from pMMB67EH Gateway with an additional lac repressor lacI <sub>q</sub>                                                                                                                                          | Kulasakara <i>et al.</i> <sup>22</sup> |
| pET16b- <i>t4rn1</i>            | template plasmid for T4 RNA ligase 1                                                                                                                                                                                                                           | Stewart Shuman's lab                   |
| pKH13                           | pKH11-derivated vector: Ptac promoter from pBTK27, Carb <sup>R</sup> , IPTG inducible                                                                                                                                                                          | This work                              |
| pKH13- <i>t4rn1</i>             | T4RNA ligase expression                                                                                                                                                                                                                                        | This work                              |
| pKH13- <i>t4K99N</i>            | T4RNA ligase mutant expression                                                                                                                                                                                                                                 | This work                              |
| pJN105                          | Expression vector the arabinose-inducible PBAD promoter, Gen <sup>R</sup>                                                                                                                                                                                      | Newman <i>et al.</i> <sup>23</sup>     |
| pKH6                            | pJN105-derivated vector: expression of small RNA with TTS +1                                                                                                                                                                                                   | This work                              |
| pKH6-PrrF1                      | <i>P. aeruginosa</i> PAO1 PrrF1 expression. Cloned from +1 to +135 of <i>prf1</i>                                                                                                                                                                              | This work                              |
| pKH6-PrrF1M1                    | PrrF1 mutant 1 expression (G83C)                                                                                                                                                                                                                               | This work                              |
| pKH6-PrrF1M2                    | PrrF1 mutant 2 expression (G72C)                                                                                                                                                                                                                               | This work                              |

|                              |                                                                                                                                                         |                                   |
|------------------------------|---------------------------------------------------------------------------------------------------------------------------------------------------------|-----------------------------------|
| pKH6-PrrF1M3                 | PrrF1 mutant 3 expression (C64G)                                                                                                                        | This work                         |
| pKH6-PrrF1M4                 | PrrF1 mutant 4 expression (C54G)                                                                                                                        | This work                         |
| pKH6-PrrF1M1.5               | PrrF1 mutant 1.5 expression (C81G)                                                                                                                      | This work                         |
| pKH6-PrrF1M2.5               | PrrF1 mutant 2.5 expression (C67G)                                                                                                                      | This work                         |
| pKH6-skatA                   | skatA expression                                                                                                                                        | This work                         |
| pKH6-skatA (M)               | skatA mutant expression (GCC→CGG at position +1452 to +1454 of <i>katA</i> mRNA)                                                                        | This work                         |
| pKH6-RyhB                    | <i>E. coli</i> MG1655 RyhB expression. Cloned from +1 to +113 of <i>prf1</i>                                                                            | This work                         |
| mini-CTX-lacZ                | lacZ transcriptional fusion attB integration construction plasmid, Tet <sup>R</sup>                                                                     | Becher and chweizer <sup>24</sup> |
| pPtac-miniCTX::lacZTL        | mini-CTX-lacZ-derived vector: modified Ptac with two lac operator sites at upstream of the -35 element and between -35 and -10 elements, IPTG inducible | This work                         |
| pPtac-miniCTX-PA5491::lacZTL | Translational mini-ctx::lacZ fusion containing 5' UTR (103 nt) and 20 amino acid of PA5491                                                              | This work                         |
| pminiCTX-PA4431::lacZTL      | mini-ctx::lacZ translational fusion containing 5' UTR (63 nt) and 20 amino acid of PA4431                                                               | This work                         |
| pPtac-miniCTX-rubA1::lacZTL  | mini-ctx::lacZ translational fusion containing 5' UTR (33 nt) and 20 amino acid of rubA1                                                                | This work                         |
| pPtac-miniCTX-cycB::lacZTL   | mini-ctx::lacZ translational fusion containing 5' UTR (121 nt) and 20 amino acid of cycB                                                                | This work                         |
| pPtac-miniCTX-sdhC::lacZTL   | mini-ctx::lacZ translational fusion containing 5' UTR (113 nt) and 20 amino acid of sdhC                                                                | This work                         |
| pPtac-miniCTX-iscS::lacZTL   | mini-ctx::lacZ translational fusion containing 5' UTR (54 nt) and 20 amino acid of iscS                                                                 | This work                         |
| pPtac-miniCTX-cysI::lacZTL   | mini-ctx::lacZ translational fusion containing 5' UTR (73 nt) and 20 amino acid of cysI                                                                 | This work                         |
| pPtac-miniCTX-fdxA::lacZTL   | mini-ctx::lacZ translational fusion containing 5' UTR (95 nt) and 20 amino acid of fdxA                                                                 | This work                         |
| pPtac-miniCTX-fadD1::lacZTL  | mini-ctx::lacZ translational fusion containing 5' UTR (95 nt) and 20 amino acid of fadD1                                                                | This work                         |
| pPtac-miniCTX-tagQ1::lacZTL  | mini-ctx::lacZ translational fusion containing 5' UTR (583 nt) and 20 amino acid of tagQ1                                                               | This work                         |
| pPtac-miniCTX-gloA1::lacZTL  | mini-ctx::lacZ translational fusion containing 5' UTR (30 nt) and 20 amino acid of gloA1                                                                | This work                         |
| pPtac-miniCTX-katA::lacZTL   | mini-ctx::lacZ translational fusion containing 5' UTR (153 nt) and 20 amino acid of katA                                                                | This work                         |
| pPtac-miniCTX-sodB::lacZTL   | mini-ctx::lacZ translational fusion containing 5' UTR (175 nt) and 20 amino acid of sodB                                                                | This work                         |
| pPtac-miniCTX-PA4880::lacZTL | mini-ctx::lacZ translational fusion containing 5' UTR (66 nt) and 20 amino acid of PA4880                                                               | This work                         |
| pPtac-miniCTX-efp::lacZTL    | mini-ctx::lacZ translational fusion containing 5' UTR (35 nt) and 20 amino acid of efp                                                                  | This work                         |
| pPtac-miniCTX-PA3940::lacZTL | mini-ctx::lacZ translational fusion containing 5' UTR (192 nt) and 20 amino acid of PA3940                                                              | This work                         |
| pPtac-miniCTX-PA5491::6His   | mini-ctx::6His translational fusion containing 5' UTR (103 nt) and coding sequences lacking the stop codon of PA5491                                    | This work                         |
| miniCTX-PA4431::6His         | mini-ctx::6His translational fusion containing 5' UTR (63 nt) and coding sequences lacking the stop codon of PA4431                                     | This work                         |
| pPtac-miniCTX-rubA1::6His    | mini-ctx::6His translational fusion containing 5' UTR (33 nt) and coding sequences lacking the stop codon of rubA1                                      | This work                         |
| pPtac-miniCTX-cycB::6His     | mini-ctx::6His translational fusion containing 5' UTR (121 nt) and coding sequences lacking the stop codon of cycB                                      | This work                         |
| pPtac-miniCTX-sdhC::6His     | mini-ctx::6His translational fusion containing 5' UTR (113 nt) and coding sequences lacking the stop codon of sdhC                                      | This work                         |
| pPtac-miniCTX-iscS::6His     | mini-ctx::6His translational fusion containing 5' UTR (54 nt) and coding sequences lacking the stop codon of iscS                                       | This work                         |

|                                    |                                                                                                                    |           |
|------------------------------------|--------------------------------------------------------------------------------------------------------------------|-----------|
| pPtac-miniCTX-cysl::6His           | mini-ctx::6His translational fusion containing 5' UTR (73 nt) and coding sequences lacking the stop codon of cysl  | This work |
| pPtac-miniCTX-fdxA::6His           | mini-ctx::6His translational fusion containing 5' UTR (95 nt) and coding sequences lacking the stop codon of fdxA  | This work |
| pPtac-miniCTX-fadD1::6His          | mini-ctx::6His translational fusion containing 5' UTR (95 nt) and coding sequences lacking the stop codon of fadD1 | This work |
| pPtac-miniCTX-gloA1::6His          | mini-ctx::6His translational fusion containing 5' UTR (30 nt) and coding sequences lacking the stop codon of gloA1 | This work |
| pPtac-miniCTX-katA::6His           | mini-ctx::6His translational fusion containing 5' UTR (153 nt) and coding sequences lacking the stop codon of katA | This work |
| pPtac-miniCTX-sodB::6His           | mini-ctx::6His translational fusion containing 5' UTR (175 nt) and coding sequences lacking the stop codon of sodB | This work |
| pPtac-miniCTX-efp::6His            | mini-ctx::6His translational fusion containing 5' UTR (35 nt) and coding sequences lacking the stop codon of efp   | This work |
| pPtac-miniCTX-sodB(M2')::lacZTL    | sodB mutant (C-30G) of pPtac-miniCTX-sodB::lacZTL                                                                  | This work |
| pPtac-miniCTX-gloA1(M1.5')::lacZTL | gloA1 mutant (G-21C) of pPtac-miniCTX-gloA1::lacZTL                                                                | This work |
| pPtac-miniCTX-sodB(M2')::6His      | sodB mutant (C-30G) of pPtac-miniCTX-sodB::6His                                                                    | This work |
| pPtac-miniCTX-gloA1(M1.5')::6His   | gloA1 mutant (G-21C) of pPtac-miniCTX-gloA1::6His                                                                  | This work |

**Supplementary Table 5: Primers used in this study.**

| Name                 | Sequence (5' to 3')                                           | Used for                                                        |
|----------------------|---------------------------------------------------------------|-----------------------------------------------------------------|
| F_XhoI_pKH5          | GTCC CTCGAG TATGCTCTTCTGCTCC                                  | cloning for pKH7                                                |
| R_ERI_rrnBT          | GTCC GAATTC CAAAAGAGTT TGTAGAAACG C                           | cloning for pKH7                                                |
| F_pKH11_bla vec_gs   | GAATACTCATCGTTGCTGCTCCATAACATC                                | cloning for pKH11                                               |
| R_pKH11_bla vec_gs   | GATTAAGCATTGGTAACAATTCGTTCAAGCCGAG                            | cloning for pKH11                                               |
| F_Bla_gsn            | GAATTGTTACCAATGCTTAATCAGTGAGG                                 | cloning for pKH11                                               |
| R_Bla_gsn            | GAGCAGCAACGATGAGTATTTCAACATTTCC                               | cloning for pKH11                                               |
| F_pspOMI_laclq       | CGAGACAGAACCTTAATGGGCCCGCTAACAGCGCG                           | cloning for pKH13                                               |
| R_pKH13_pBTK27       | CCGCCAAAACAGCCAAGCTTCGTGACTCTAGA GTACCGAGCTCGAATTC            | cloning for pKH13                                               |
| F_xbl_SD_T4RL_pKH13  | ATTCGAGCTCGGTAC TCTAGA CTAAGAAGTAGATATACAT ATG CAAGAACTTTTAAC | cloning for pKH13- <i>t4ml1</i>                                 |
| R_Hnd3_T4RL_pKH11    | CCGCCAAAACAGCC AAGCTT TTAGTATCCTTCTGGG                        | cloning for pKH13- <i>t4ml1</i>                                 |
| F_MluI_laclq         | CTGACGCGTTGCGCGAGAAGATTGTGC                                   | cloning for pKH4                                                |
| R_Dn_laclq           | CCGCTGACATTTATGCCAGAACCCTTATG                                 | cloning for pKH4                                                |
| F_Up_Ptac            | GGCATAAATGTCAGCGGATAACATTGACATTGTGAGCGGATAAC                  | cloning for pKH4                                                |
| R_Dn_Ptac            | CCCAAGCTTGTGACTCTAGAATTATATTGTTATCCGCTCACAATG                 | cloning for pKH4                                                |
| F_MluI_pJN150        | GTCC ACGCGT AACA AAGTGTCTA TAATCAC                            | cloning for pKH6                                                |
| R_ERI_Xbl_pJN150     | GTCC GAATTC GACGTC TCTAGA AACAGTAGAG AGTTGCG                  | cloning for pKH6                                                |
| F_PstI_rrnBT         | GTCC CTCGAGAAGCTT ACTAGT GGCTGTTTTGGCGGATG                    | cloning for pKH6                                                |
| R_sacI_rrnBT         | GTCC GAGCTC CAAAAGAGTT TGTAGAAACG C                           | cloning for pKH6                                                |
| R_phos_notI_pKH6     | p-CCATGGACGCACACCCGTGG                                        | cloning for pKH6                                                |
| F_phos_aac65_pKH6    | p-CTAAAGGGAACAAAAGCTGGGTACC                                   | cloning for pKH6                                                |
| F_t4rIK99N           | GATTATATCTAACAAATGAAGACGGGCTTTG                               | cloning for pKH13- <i>t4ml1K99N</i>                             |
| R_t4rIK99N           | CAAAGACCCGCTTCTATTGTTAGAATAAATC                               | cloning for pKH13- <i>t4ml1K99N</i>                             |
| F_XbaI_prrf1+1       | GTCC TCTAGA T AACTGGTCGC GAGATCAGC                            | cloning for pKH6-PrrF1 and PrrF1 mutants                        |
| R_Hd3_prrf1+135      | GTCCAAGCTTCTCCGGCCGAATCGCAG                                   | cloning for pKH6-PrrF1 and PrrF1 mutants                        |
| F_prrf1_M1           | CTAATCA CCGTTTTTGA CCCGGC                                     | cloning for pKH6-PrrF1(M1)                                      |
| R_prrf1_M1           | GGTCAAAAACGGTGATTAGCCTGATG                                    | cloning for pKH6-PrrF1(M1)                                      |
| F_prrf1_M2re         | CCTCATC ACGCTAATCA CGGTTTTTGG                                 | cloning for pKH6-PrrF1(M2)                                      |
| R_prrf1_M2           | GATTAGCGTATGAGGAGAT                                           | cloning for pKH6-PrrF1(M2)                                      |
| F_prrf1_M3           | GATTA TCTCGTCATC AGGCTAATC                                    | cloning for pKH6-PrrF1(M3)                                      |
| R_prrf1_M3           | CCTGATGACGAGATAATCTGAAG                                       | cloning for pKH6-PrrF1(M3)                                      |
| F_prrf1_M4           | GTCGGACT CTTGAGATTA TCTCCTC                                   | cloning for pKH6-PrrF1(M4)                                      |
| R_prrf1_M4           | GATAATCTCAAGAGTCCGACTG                                        | cloning for pKH6-PrrF1(M4)                                      |
| F_PrrF1_M1.5         | CTCATCAGGCTAATCAGGGTTTTGACCCGGCAC                             | cloning for pKH6-PrrF1(M1.5)                                    |
| R_PrrF1_M1.5         | GTGCCGGGTCAAAAACCCCTGATTAGCCTGATGAG                           | cloning for pKH6-PrrF1(M1.5)                                    |
| F_PrrF1_M2.5         | GACTCTTTCAGATTATCTCCTGATCAGGCTAATCACGG                        | cloning for pKH6-PrrF1(M2.5)                                    |
| R_PrrF1_M2.5         | CCGTGATTAGCCTGATCAGGAGATAATCTGAAGAGTC                         | cloning for pKH6-PrrF1(M2.5)                                    |
| F_xbaI_pkh6_sKatAinf | CAACTCTCTACTGTT TCTAGA T ACCGGAACAGATCCAGCGG                  | cloning for pKH6-skatA and skatA(M)                             |
| R_Hnd3_pkh6_sKatAinf | CCGCCAAAACAGCC AAGCTT CTGATCCGGGTCAAGCC                       | cloning for pKH6-skatA and skatA(M)                             |
| F_skatAmut-fus       | GACTGATGCGGTGATGAGGCC                                         | cloning for pKH6-skatA(M)                                       |
| R_skatAmut-fus       | GGCCTCATCACCGCATCAGTCCAGCTTCAG                                | cloning for pKH6-skatA(M)                                       |
| F_Hnd3_rppHdel       | GCATAAATGTAAGC AAGCTTCT GTGACGAAGCGGTTGG                      | cloning for pEXG2- $\Delta$ rppH                                |
| F_rppH_fus           | GAGGATGTCCAGCGACACGGAGACAAGGC                                 | cloning for pEXG2- $\Delta$ rppH                                |
| R_rppH_fus           | GCCTTGCTCCGTGTCGCTGGGACATCCTC                                 | cloning for pEXG2- $\Delta$ rppH                                |
| R_BHI_rppHdel        | GAGCTCGAGCCCGG GGATCC CTCGGCATGCGCGATG                        | cloning for pEXG2- $\Delta$ rppH                                |
| F_BHI_Del_katA5n3    | CAGGTGACTCTAGA GGATCC CCATCGTAAAAGTGGTC                       | cloning for pEXG2- $\Delta$ katA                                |
| R_Del_katA5n3_fusre  | CTAGCCGCATATGCTCCAGCCCTCTACAATCC                              | cloning for pEXG2- $\Delta$ katA                                |
| F_Del_katA5n3_fusre  | GGATTGTAGGAGGGCTG GAGCATATGCGGCTAG                            | cloning for pEXG2- $\Delta$ katA                                |
| F_BHI_del_sKatA      | CAGGTGACTCTAGA GGATCC GTACGAGAGCATCGAG                        | cloning for pEXG2- $\Delta$ skatA                               |
| F_sKatAAdel_fus      | GACATCCGGATGTATCTGCATTGGCTTGACC                               | cloning for pEXG2- $\Delta$ skatA                               |
| R_sKatAAdel_fus      | CAAGCCAATGCAGATACATCGCGGATGCTTC                               | cloning for pEXG2- $\Delta$ skatA                               |
| R_ERI_del_sKatA      | GAAATTAATTAAGGTACC GAATTC GCCAACTGGGCCTTGAG                   | cloning for pEXG2- $\Delta$ skatA and pEXG2- $\Delta$ katA      |
| R_prrf1+26-1         | CTTACCGGCTGATCTCGCGAC                                         | RT-PCR for the detection of chimera products of 5' end of PrrF1 |
| F_sodB-6             | GAGACACCATGGCTTTCGAATTGCC                                     | RT-PCR for the detection of chimera products of SodB-PrrF1      |
| F_pa4880+1           | ATGACCACCGTTCAACTGACGGAC                                      | RT-PCR for the detection of chimera products of PA4880-PrrF1    |
| F_elfp-3             | CGTATGAAAACCGCTCAAGAGTTCC                                     | RT-PCR for the detection of chimera products of elfp-PrrF1      |
| F_pa3940-4           | CACCATGGCACTGACCAAAGACC                                       | RT-PCR for the detection of chimera products of PA3940-PrrF1    |
| F_XbaI_ryhB+1A       | GTCC TCTAGA TA GCGATCAGGA AGACCCCTC                           | cloning for pKH6-RyhB                                           |
| R_Hnd3_ryhB+113      | GTCC AAGCTT GCACTCCCGT GGATAAATTG AG                          | cloning for pKH6-RyhB                                           |

|                       |                                                        |                                                                     |
|-----------------------|--------------------------------------------------------|---------------------------------------------------------------------|
| R_ryhB+57             | GAAGCAATGTGAGCAATGTCGTG                                | RT for the detection of chimera products of 5' end of RyhB          |
| R_ryhB+45             | GCAATGTCGTGCTTTCAGGTTTC                                | RT-PCR for the detection of chimera products of 5' end of RyhB      |
| F_ec_sodB-32          | GCAAATTAATAATAAAGGAGAGTAGCAATGTC                       | RT-PCR for the detection of chimera products of sodB-RyhB           |
| F_ec_sdhD-11          | GGAGTCCTCGTATGGTAAGCAACG                               | RT-PCR for the detection of chimera products of sdhD-RyhB           |
| F_ec_efp-11           | CAGAGGGCCTTATGGCAACGTAC                                | RT-PCR for the detection of efp and chimera products of efp-RyhB    |
| F_q_ec_rpsT-11        | GGAGTTGGACCTTGCTAATATCAAATC                            | RT-PCR for the detection of rpsT and chimera products of rpsT-RyhB  |
| F_ec_rpos-125_q       | CATTTTGAATTCGTTACAAGGGAAATCC                           | RT-PCR for the detection of rpoS                                    |
| R_ec_rpos+25_q        | GAACCTTCAGCGTATTCTGACTCATAAG                           | RT-PCR for the detection of rpoS                                    |
| R_q_ec_efq+105        | GCCTTTACCCGGTTTTACGAATTCAC                             | RT-PCR for the detection of efp                                     |
| R_q_ec_rpsT+96        | GATGAAAGTACGCATCATAGAGCGAC                             | RT-PCR for the detection of rpsT                                    |
| F_shiA-62             | GACGGCAATGTGAGTTACCTTTTCC                              | RT-PCR the detection of chimera products of shiA-RyhB               |
| R_shiA-38             | GGAAAAGGTAACACATTGCCGTC                                | RT-PCR the detection of chimera products of RyhB-shiA               |
| F_ryhB+30             | GAAAGCACGACATTGCTCACATTGC                              | RT-PCR the detection of chimera products of RyhB-shiA               |
| R_ryhB+54             | GCAATGTGAGCAATGTCGTGCTTTC                              | RT-PCR the detection of chimera products of shiA-RyhB               |
| F_q_t4rn1+65          | CTCAGATGATGTAAGTGCATCTGGAAG                            | qRT-PCR for T4 RNA ligase                                           |
| R_q_t4rn1+171         | CATAATTCACGACATTCTAGTGCATC                             | qRT-PCR for T4 RNA ligase                                           |
| F_q_Prrf1+8           | CGCGAGATCAGCCGGTAAGC                                   | qRT-PCR for PrrF1                                                   |
| R_q_Prrf1+86          | AAACCGTGATTAGCCTGATGAGGAG                              | qRT-PCR for PrrF1                                                   |
| F_sodB+25             | CCTTACGAAAAGAACGCCCTTGAG                               | qRT-PCR for sodB                                                    |
| R_sodB+132            | CGGGATCAGGTTGTTCCAGTTTC                                | qRT-PCR for sodB                                                    |
| F_q_pa4880+24         | CGTCCAGACCCCTTCGCGAC                                   | qRT-PCR for PA4880                                                  |
| R_q_PA4880+158        | GCAGGAAGCAGACCAACTCGG                                  | qRT-PCR for PA4880                                                  |
| F_efp-3               | CGTATGAAAACCGCTCAAGAGTTCC                              | qRT-PCR and RT-PCR for efp                                          |
| R_q_efp               | CCGGTCAGCAGGTTCTTCAGC                                  | qRT-PCR and RT-PCR for efp                                          |
| F_PA3940_q+25         | GATCCAGGACATCGCCGAAGC                                  | qRT-PCR and RT-PCR for PA3940                                       |
| R_PA3940+_q           | GATTTCCGATCGTTCTCCAGG                                  | qRT-PCR and RT-PCR for PA3940                                       |
| rpsL_F_q_in           | TGA AGG TCA CAA CCT GCA AGA GCA                        | qRT-PCR and RT-PCR for rpsL                                         |
| rpsL_R_q_in           | AAC GAC CCT GCT TAC GGT CTT TGA                        | qRT-PCR and RT-PCR for rpsL                                         |
| F_KpnI_Ptac_inf       | CGACTCACTATAGGGCGAATTTGGGTACCGCACGGTGCACCAATGC         | cloning for pTlac-miniCTX::lacZTL                                   |
| R_Fus_Ptac_inf        | GCTTGGATCCCTCGAGAATCCACACATTATACGAGCC                  | cloning for pTlac-miniCTX::lacZTL                                   |
| F_Fus_lacZ_inf        | GAATTCTCGAGGGATCCAAGCTTGCCGCTGTTTTACAACG               | cloning for pTlac-miniCTX::lacZTL                                   |
| R_AatII_lacZ_inf      | GGTTTATGCAGCAACGAGACGTCACGGAAAATGCCGCTC                | cloning for pTlac-miniCTX::lacZTL                                   |
| F_ERI_sodBTSS+1       | TATAATGTGTG GAATTC GCGG CACTGGGAGC CTAG                | cloning for pTlac-miniCTX-sodB::lacZTL, ::6His and sodB (M2) mutant |
| F_ERI_4880TSS+1       | TATAATGTGTG GAATTC GTAAG CAGAAAAAGC CAG                | cloning for pTlac-miniCTX-PA4880::lacZTL                            |
| F_ERI_efpTSS+1        | CAATATAATGTGTG GAATTC CCTGATTTTTGTCTTTCATCCATC         | cloning for pTlac-miniCTX-efp::lacZTL, and ::6His                   |
| F_ERI_pa3940TSS+1     | CAATATAATGTGTG GAATTC AGCCCGCAAAAACCTCTG               | cloning for pTlac-miniCTX-PA3940::lacZTL                            |
| R_Hnd3_sodB+20aa      | TGTA AACGACGCGCAAGCTTGAAATGTGCGGCTCAAG                 | cloning for pTlac-miniCTX-sodB::lacZTL and sodB (M2) mutant         |
| R_Hnd3_pa4880+20aa    | TGTA AACGACGCGCAAGCTTGATGTTCTTGCGGGCACG                | cloning for pTlac-miniCTX-PA4880::lacZTL                            |
| R_Hnd3_efp+20aa       | TGTA AACGACGCGCAAGCTTCCAGGGAGCGCCATTG                  | cloning for pTlac-miniCTX-efp::lacZTL                               |
| R_Hnd3_pa3940+20aa    | TGTA AACGACGCGCAAGCTTCTTCTGCGCTCGATGG                  | cloning for pTlac-miniCTX-PA3940::lacZTL                            |
| R_NP_PrrF1            | GACTGCGTGGGTCTCTCAG                                    | Northern blot for PrrF1                                             |
| R_NP_5sRNA+67         | CGTTCCTTCTGAGTTCGGGAAGG                                | Northern blot for 5S rRNA                                           |
| R_NP_sodB+137         | GTGCCCGGGA TCAGGTTGTT CAGG                             | Northern blot for sodB                                              |
| R_NP_katA+69          | GGTCTGCAGTTCGTTATCGAC                                  | Northern blot for katA                                              |
| R_NP_skatA            | CATCAGTCCAGCTTCAGGCC                                   | Northern blot for skatA                                             |
| R_polyA_PrrF1         | AAAAAAAAAAAAAAAAAAGAGTCCGACTGCGTGGGTC                  | Capturing Oligo for PrrF1                                           |
| P1_R_PrrF1+45         | GACTGCGTGGGTCTCTCAG                                    | RT for PrrF1, identical to R_NP_PrrF1                               |
| P2_R_PrrF1+26         | CTTACCGGCTGATCTCGCGAC                                  | PCR after RT for PrrF1, identical to R_PrrF1+26-1                   |
| P3_F_PrrF1+62         | CTCTCATCAGGCTAATCACGG                                  | PCR after RT for PrrF1                                              |
| F_KpnI_Laclq_inf      | CGACTCACTATAGGGCGAATTTGGGTACCCCTTCTGCTCCCGAACGC        | cloning for pTlac-miniCTX::6His                                     |
| R_pKHctx3G6His-P      | /5phos/ GGATCCCTCGAGAATTCACACATTATATTG                 | cloning for pTlac-miniCTX::6His                                     |
| F_pKHctx3G6His-P      | /5phos/ AAGCTTGGCCACCACCACCACCACCTAATAAACCGGGCAGGCCATG | cloning for pTlac-miniCTX::6His                                     |
| R_speI_lacZTL_ctx_inf | GGCCGCTCTAGAAGTGGGAACAAAAGCTGGAATAG                    | cloning for pTlac-miniCTX::6His                                     |
| F_ERI_PA5491_ctZ1     | CAATATAATGTGTG GAATTC GATTTGTGTGCGCTTATCC              | cloning for pTlac-miniCTX-PA5491::lacZTL and ::6His                 |
| R_Hd3_PA5491_ctZ1     | TGTA AACGACGCGCAAGCTTCCGCCCTGCGCCGTAACG                | cloning for pTlac-miniCTX-PA5491::lacZTL                            |

|                                           |                                                                  |                                                                      |
|-------------------------------------------|------------------------------------------------------------------|----------------------------------------------------------------------|
| F_ERI_PA4431_ctZ2                         | CAATATAATGTGTG GAATTC ATTTTACTTAAAGGCGCTGATTAG                   | cloning for pPtac-miniCTX-PA4431::lacZTL and ::6His                  |
| R_Hd3_PA4431_ctZ2                         | TGTA AACACGACGGCAAGCTTCGCCAACACAGAGGTGGC                         | cloning for pPtac-miniCTX-PA4431::lacZTL                             |
| F_ERI_rubA1_ctZ3                          | CAATATAATGTGTG GAATTC GCTGAACCGTGGTAACCCG                        | cloning for pPtac-miniCTX-rubA1::lacZTL and ::6His                   |
| R_Hd3_rubA1_ctZ3                          | TGTA AACACGACGGCAAGCTTCGCCAGCCTTTGGCCTCG                         | cloning for pPtac-miniCTX-rubA1::lacZTL                              |
| F_ERI_cycB_ctZ4                           | CAATATAATGTGTG GAATTC TTTCTGCCGGGCTTTCTTTGCC                     | cloning for pPtac-miniCTX-cycB::lacZTL and ::6His                    |
| R_Hd3_cycB_ctZ4                           | TGTA AACACGACGGCAAGCTTGGTCTGAGCTGAGCGCTTAC                       | cloning for pPtac-miniCTX-cycB::lacZTL                               |
| F_ERI_sdhC_ctZ5                           | CAATATAATGTGTG GAATTC GACCGCAAGGGGTATTCC                         | cloning for pPtac-miniCTX-sdhC::lacZTL and ::6His                    |
| R_Hd3_sdhC_ctZ5                           | TGTA AACACGACGGCAAGCTTGAGTTTGTAGTCTTAGGTC                        | cloning for pPtac-miniCTX-sdhC::lacZTL                               |
| F_ERI_iscS_ctZ6                           | CAATATAATGTGTG GAATTC ATTTGAAGCGTCCGCCATCG                       | cloning for pPtac-miniCTX-iscS::lacZTL and ::6His                    |
| R_Hd3_iscS_ctZ6                           | TGTA AACACGACGGCAAGCTTGGCGACGGGGATCGACG                          | cloning for pPtac-miniCTX-iscS::lacZTL                               |
| F_ERI_cysl_ctZ7                           | CAATATAATGTGTG GAATTC ACTCCGCTGGAGCGCTAG                         | cloning for pPtac-miniCTX-cysl::lacZTL and ::6His                    |
| R_Hd3_cysl_ctZ7                           | TGTA AACACGACGGCAAGCTTGGGAACTGCTTGACGGGTC                        | cloning for pPtac-miniCTX-cysl::lacZTL                               |
| F_ERI_fdxA_ctZ8                           | CAATATAATGTGTG GAATTC GTTATATGCATGGAAGATGC                       | cloning for pPtac-miniCTX-fdxA::lacZTL and ::6His                    |
| R_Hd3_fdxA_ctZ8                           | TGTA AACACGACGGCAAGCTTGACTTCCACGCAGTCGGTG                        | cloning for pPtac-miniCTX-fdxA::lacZTL                               |
| F_ERI_fadD1_ctZ9                          | CAATATAATGTGTG GAATTC GCCTAATAGCCCTGGGTCCAG                      | cloning for pPtac-miniCTX-fadD1::lacZTL and ::6His                   |
| R_Hd3_fadD1_ctZ9                          | TGTA AACACGACGGCAAGCTTGGGATTGATCTCGGCAGC                         | cloning for pPtac-miniCTX-fadD1::lacZTL                              |
| F_ERI_tagQ1_ctZ10                         | CAATATAATGTGTG GAATTC AGCAATTGGACGGAACTATTG                      | cloning for pPtac-miniCTX-tagQ1::lacZTL                              |
| R_Hd3_tagQ1_ctZ10                         | TGTA AACACGACGGCAAGCTTCAACAGCGACAGCGCTAGC                        | cloning for pPtac-miniCTX-tagQ1::lacZTL                              |
| F_ERI_gloA1_ctZ11                         | CAATATAATGTGTG GAATTC CTTTGACCGTGAAGCTCG                         | cloning for pPtac-miniCTX-gloA1::lacZTL and ::6His                   |
| R_Hd3_gloA1_ctZ11                         | TGTA AACACGACGGCAAGCTTATAGAAATCGATCGAGCGATC                      | cloning for pPtac-miniCTX-gloA1::lacZTL and M1.5' mutant             |
| F_ERI_katA_ctZ12                          | CAATATAATGTGTG GAATTC CTTTTACGAAAAGCTACGTTCCG                    | cloning for pPtac-miniCTX-katA::lacZTL and ::6His                    |
| R_Hd3_katA_ctZ12                          | TGTA AACACGACGGCAAGCTTGTCTGGTTATCGACCACC                         | cloning for pPtac-miniCTX-katA::lacZTL                               |
| R_Hn3_PA5491_ctH1                         | GTGGTGGCCAAGCTTCTTCTCACCATCCACTGGATG                             | cloning for pPtac-miniCTX-PA5491::6His                               |
| R_Hn3_PA4431_ctH2                         | GTGGTGGCCAAGCTTGGCTTCTCCTGGTCCACG                                | cloning for pPtac-miniCTX-PA4431::6His                               |
| R_Hn3_rubA1_ctH3                          | GTGGTGGCCAAGCTTGGCATTCTGCATCATCTCGAAG                            | cloning for pPtac-miniCTX-rubA1::6His                                |
| R_Hn3_cycB_ctH4                           | GTGGTGGCCAAGCTTCCAGACCGACATATGCTTG                               | cloning for pPtac-miniCTX-cycB::6His                                 |
| R_Hn3_sdhC_ctH5                           | GTGGTGGCCAAGCTTCCATACCCATACCCCGCCAGAAC                           | cloning for pPtac-miniCTX-sdhC::6His                                 |
| R_Hn3_iscS_ctH6                           | GTGGTGGCCAAGCTTGTGCGCTGCCATTGACCTCG                              | cloning for pPtac-miniCTX-iscS::6His                                 |
| R_Hn3_cysl_ctH7                           | GTGGTGGCCAAGCTTATGATTCCTGCATATACG                                | cloning for pPtac-miniCTX-cysl::6His                                 |
| R_Hn3_fdxA_ctH8                           | GTGGTGGCCAAGCTTGGCTCCAGATGCTGGAGCTTG                             | cloning for pPtac-miniCTX-fdxA::6His                                 |
| R_Hn3_fadD1_ctH9                          | GTGGTGGCCAAGCTTCTTCTGCGCCGCTTCTTTCAG                             | cloning for pPtac-miniCTX-fadD1::6His                                |
| R_Hn3_gloA1_ctH11                         | GTGGTGGCCAAGCTTGAAGACTTCTGGATCAGTTT                              | cloning for pPtac-miniCTX-gloA1::6His, and M1.5' mutant              |
| R_Hn3_katA_ctH12                          | GTGGTGGCCAAGCTTGTCCAGCTTCCAGCCGAGG                               | cloning for pPtac-miniCTX-katA::6His                                 |
| F_BHI_tagQ1_6H                            | CAGGTGACTCTAGA GGATCC CTACATGGAGAAGCAGAAGC                       | cloning for pEXG-tagQ1-6H                                            |
| R_tagQ1_6H_fus                            | GGCCTTGGCGCAGCTCGGC                                              | cloning for pEXG-tagQ1-6H                                            |
| F_tagQ1_6H_fus                            | CCGAGCTGCGCCAAGGCCACCACCACCACCAGTATCGGCCTCGTTACCGGCAC            | cloning for pEXG-tagQ1-6H                                            |
| R_ERI_tagQ1_6H                            | GAAATTAATTAAGGTACC GAATTC CGCTGTTCCAGGAATGGC                     | cloning for pEXG-tagQ1-6H                                            |
| F_tagQ1_6H_veri                           | CTGCAACAGCCCGGACATGG                                             | Validation of tagQ-6His integration on chromosome                    |
| R_tagQ1_6H_veri                           | GTTGCTGCCGTAACGAGG                                               | Validation of tagQ-6His integration on chromosome                    |
| R_Hn3_sodB_ctHctrl                        | GTGGTGGCCAAGCTTGGCAGCGAAATCTTCGCTAC                              | cloning for pPtac-miniCTX-sodB::6His, and M2' mutant                 |
| R_Hn3_efp_ctHctrl                         | GTGGTGGCCAAGCTTGGCCTTGACGCGGACTTG                                | cloning for pPtac-miniCTX-efp::6His                                  |
| F_sodB_M2_RVT_fus                         | GCTAGCCGCGCCAGTCGTGACCTGAGGAAGAATAG                              | cloning for pPtac-miniCTX-sodB (M2)::lacZTL and sodB (M2)::6His      |
| R_sodB_M2_RVT_fus                         | CTATTCTTCTCAGGTCACGACTGGCGCGGCTAGC                               | cloning for pPtac-miniCTX-sodB (M2)::lacZTL and sodB (M2)::6His      |
| F_gloA1_M1.5_RVT_ERI                      | CAATATAATGTGTG GAATTC CTTTGACCTGAAGCTCGAGGCAATG                  | cloning for pPtac-miniCTX-gloA1 (M1.5)::lacZTL and gloA1(M1.5)::6His |
| NEBNext Index 5 Primer for Illumina       | CAAGCAGAAGACGGCATACGAGATCACTGTGTGACTGGAGTTTCAGACGTGTGCTCTCCGATCT | Library 1 for GRIL-Seq: ACAGTG                                       |
| NEBNext Index 6 Primer for Illumina       | CAAGCAGAAGACGGCATACGAGATATTGGCTGACTGGAGTTTCAGACGTGTGCTCTCCGATCT  | Library 2 for GRIL-Seq: GCCATT                                       |
| NEBNext Index 7 Primer for Illumina       | CAAGCAGAAGACGGCATACGAGATGATCTGTGACTGGAGTTTCAGACGTGTGCTCTCCGATCT  | Library 1 (Vec.) for RNA-Seq: CAGATC                                 |
| NEBNext Index 8 Primer for Illumina       | CAAGCAGAAGACGGCATACGAGATCAAGTGTGACTGGAGTTTCAGACGTGTGCTCTCCGATCT  | Library 2 (Vec.) for RNA-Seq: ACTTGA                                 |
| NEBNext Index 9 Primer for Illumina       | CAAGCAGAAGACGGCATACGAGATCTGATCTGACTGGAGTTTCAGACGTGTGCTCTCCGATCT  | Library 3 (PrrF1++) for RNA-Seq: GATCAG                              |
| NEBNext Index 10 Primer for Illumina      | CAAGCAGAAGACGGCATACGAGATAAGCTAGTACTGGAGTTTCAGACGTGTGCTCTCCGATCT  | Library 4 (PrrF1++) for RNA-Seq: TAGCTT                              |
| NEBNext Universal PCR Primer for Illumina | AATGATACGGCGACCACCGAGATCTACACTCTTCCCTACACGACGCTCTTCCGATCT        | Libraries for GRIL-Seq and RNA-seq                                   |



## Supplementary References

1. Frohlich, K.S. & Vogel, J. Activation of gene expression by small RNA. *Curr. Opin. Microbiol.* **12**, 674-682 (2009).
2. Podkaminski, D. & Vogel, J. Small RNAs promote mRNA stability to activate the synthesis of virulence factors. *Mol. Microbiol.* **78**, 1327-1331 (2010).
3. Masse, E. & Gottesman, S. A small RNA regulates the expression of genes involved in iron metabolism in Escherichia coli. *Proc. Natl. Acad. Sci. USA* **99**, 4620-4625 (2002).
4. Masse, E., Vanderpool, C.K. & Gottesman, S. Effect of RyhB small RNA on global iron use in Escherichia coli. *J. Bacteriol.* **187**, 6962-6971 (2005).
5. Oglesby, A.G. *et al.* The influence of iron on Pseudomonas aeruginosa physiology: a regulatory link between iron and quorum sensing. *J. Biol. Chem.* **283**, 15558-15567 (2008).
6. Prevost, K. *et al.* The small RNA RyhB activates the translation of shiA mRNA encoding a permease of shikimate, a compound involved in siderophore synthesis. *Mol. Microbiol.* **64**, 1260-1273 (2007).
7. Wilderman, P.J. *et al.* Identification of tandem duplicate regulatory small RNAs in Pseudomonas aeruginosa involved in iron homeostasis. *Proc. Natl. Acad. Sci. USA* **101**, 9792-9797 (2004).
8. Wurtzel, O. *et al.* The single-nucleotide resolution transcriptome of Pseudomonas aeruginosa grown in body temperature. *PLoS Path.* **8**, e1002945 (2012).
9. Miyakoshi, M., Chao, Y. & Vogel, J. Cross talk between ABC transporter mRNAs via a target mRNA-derived sponge of the GcvB small RNA. *EMBO J.* **34**, 1478-1492 (2015).
10. Chao, Y. & Vogel, J. A 3' UTR-Derived Small RNA Provides the Regulatory Noncoding Arm of the Inner Membrane Stress Response. *Mol. Cell* **61**, 352-363 (2016).
11. Bally, M., Ball, G. & Lazdunski, A. A new cluster of three tRNA genes in Pseudomonas aeruginosa. *Nucleic Acids Res.* **20**, 3779 (1992).
12. Lalaouna, D. *et al.* A 3' external transcribed spacer in a tRNA transcript acts as a sponge for small RNAs to prevent transcriptional noise. *Mol. Cell* **58**, 393-405 (2015).
13. Picelli, S. *et al.* Full-length RNA-seq from single cells using Smart-seq2. *Nat. Protoc.* **9**, 171-181 (2014).

14. Morrissey, D.V. *et al.* Nucleic acid hybridization assays employing dA-tailed capture probes. I. Multiple capture methods. *Anal. Biochem.* **181**, 345-359 (1989).
15. Hoang, T.T., Kutchma, A.J., Becher, A. & Schweizer, H.P. Integration-proficient plasmids for *Pseudomonas aeruginosa*: site-specific integration and use for engineering of reporter and expression strains. *Plasmid* **43**, 59-72 (2000).
16. Miller, J.H. Experiments in molecular genetics. *Cold Spring Harbor Laboratory* (1972).
17. Busch, A., Richter, A.S. & Backofen, R. IntaRNA: efficient prediction of bacterial sRNA targets incorporating target site accessibility and seed regions. *Bioinformatics* **24**, 2849-2856 (2008).
18. Simon, R., Priefer, U. & Puhler, A. A Broad Host Range Mobilization System for In Vivo Genetic Engineering: Transposon Mutagenesis in Gram Negative Bacteria. *Nat. Biotechnol.* **1**, 784-791 (1983).
19. Rietsch, A., Vallet-Gely, I., Dove, S.L. & Mekalanos, J.J. ExsE, a secreted regulator of type III secretion genes in *Pseudomonas aeruginosa*. *Proc. Natl. Acad. Sci. USA* **102**, 8006-8011 (2005).
20. Figurski, D.H. & Helinski, D.R. Replication of an origin-containing derivative of plasmid RK2 dependent on a plasmid function provided in trans. *Proc. Natl. Acad. Sci. USA* **76**, 1648-1652 (1979).
21. Furste, J.P. *et al.* Molecular cloning of the plasmid RP4 primase region in a multi-host-range tacP expression vector. *Gene* **48**, 119-131 (1986).
22. Rietsch, A. & Mekalanos, J.J. Metabolic regulation of type III secretion gene expression in *Pseudomonas aeruginosa*. *Mol. Microbiol.* **59**, 807-820 (2006).
23. Kulasakara, H. *et al.* Analysis of *Pseudomonas aeruginosa* diguanylate cyclases and phosphodiesterases reveals a role for bis-(3'-5')-cyclic-GMP in virulence. *Proc. Natl. Acad. Sci. USA* **103**, 2839-2844 (2006).
24. Newman, J.R. & Fuqua, C. Broad-host-range expression vectors that carry the L-arabinose-inducible *Escherichia coli* araBAD promoter and the araC regulator. *Gene* **227**, 197-203 (1999).
25. Becher, A. & Schweizer, H.P. Integration-proficient *Pseudomonas aeruginosa* vectors for isolation of single-copy chromosomal lacZ and lux gene fusions. *Bio. Techniques* **29**, 948-950, 952 (2000).
